# Supplementary material for: Effect of the Seasonal Climatic Variations on the Accumulation of Fruit Volatiles in Four Grape Varieties Under the Double Cropping System
Source: Front Plant Sci. 2022 Jan 27;12:809558. doi: 10.3389/fpls.2021.809558 (PMC8829325; doi:10.3389/fpls.2021.809558)
Supplement: Supplementary file 2 [file Data_Sheet_2.xlsx]

## Sheet: Supplementary Table 1
	Supplementary Table 1. Information of all the studied varieties.
	Variety	Color	Usage	Rootstock	Inter- and intra-row vine spacing	Planted year	Row orientation
	V vinifera L. cv. Cabernet Sauvignon (CS)	red	wine grape	SO4	3.5 m × 1.5 m	2007	east-west
	V. vinifera L. cv. Riesling (R)	white	wine grape	SO4	3.5 m × 1.5 m	2007	east-west
	V. vinifera L. cv. Muscat Hamburg (MH)	red	table grape	5BB	3.5 m × 1 m	2007	north-south
	V. vinifera L. cv. Victoria (V)	white	table grape	5BB	3.5 m × 1 m	2007	north-south

## Sheet: Supplementary Table 2
	Supplementary Table 2. Grapevine growth stages and yield of CS, R, MH, and V under the double cropping system in 2014 and 2015.
	Variety	Season	Grapevine growth stages (month/day)						Estimated yield/m row (kg)
			budburst	full bloom	pea-size	onset of veraison	veraison completement	harvest
			E-L 4	E-L 23	E-L 31	E-L 35	E-L 36	E-L 38
	V vinifera L. cv. Cabernet Sauvignon (CS)	2014 Summer season	2021-03-06	2021-04-15	2021-05-12	2021-06-15	2021-07-13	2021-07-28	3.54 ± 0.29ab
		2014 Winter season	-	2021-09-12	2021-10-25	2021-11-10	2021-11-27	1/13 (2015)	2.25 ± 0.05d
		2015 Summer season	-	2021-04-18	2021-05-15	2021-06-10	2021-07-10	2021-07-29	3.92 ± 0.12a
		2015 Winter season	-	2021-09-10	2021-10-23	2021-11-09	2021-11-30	1/19 (2016)	2.51 ± 0.12c
	V. vinifera L. cv. Muscat Hamburg (MH)	2014 Summer season	2021-03-16	2021-04-10	2021-05-12	2021-06-05	2021-06-23	2021-06-30	5.20 ± 0.14a
		2014 Winter season	-	2021-09-15	2021-11-10	2021-11-27	2021-12-22	1/5 (2015)	4.26 ± 0.28b
		2015 Summer season	-	2021-04-14	2021-05-15	2021-06-10	2021-07-16	2021-07-29	5.40 ± 0.20a
		2015 Winter season	-	2021-09-15	2021-10-23	2021-11-09	2021-11-30	1/19 (2016)	5.14 ± 0.28a
	V. vinifera L. cv. Riesling (R)	2014 Summer season	2021-03-06	2021-04-15	2021-05-12	2021-06-15	2021-07-13	2021-07-28	2.01 ± 0.04b
		2014 Winter season	-	2021-09-12	2021-10-25	2021-11-10	2021-11-27	1/13 (2015)	1.71 ± 0.06c
		2015 Summer season	-	2021-04-18	2021-05-15	2021-06-10	2021-07-10	2021-07-29	3.11 ± 0.15a
		2015 Winter season	-	2021-09-10	2021-10-23	2021-11-09	2021-11-30	1/19 (2016)	1.58 ± 0.15c
	V. vinifera L. cv. Victoria (V)	2014 Summer season	2021-03-16	2021-04-10	2021-05-12	2021-06-05	2021-06-23	2021-06-30	9.40 ± 1.76ab
		2014 Winter season	-	2021-09-15	2021-11-10	2021-11-27	2021-12-22	1/5 (2015)	6.54 ± 0.50c
		2015 Summer season	-	2021-04-14	2021-05-15	2021-06-04	2021-06-25	2021-07-06	10.06 ± 0.38a
		2015 Winter season	-	2021-09-15	2021-10-23	2021-11-09	2021-11-30	1/19 (2016)	8.32 ± 0.88b
	"-" indicates no record. Different letters indicate in each variety signiﬁcant differences among seasons based on Duncan’s multiple range test at p < 0.05.

## Sheet: Supplementary Table 3
	Supplementary Table 3. Alignment statistics results with reference genome for all samples.
	Variety	Season	Stage	Replicate	Total Reads	Total Mapped Reads	Average Reads	Average Mapped Reads	Quality (%)
	Cabernet Sauvignon	Summer	E-L 35	1	57270577	47956300	48232061	39979988	82.9
				2	24576896	20318583
				3	62848709	51665081
			E-L 36	1	24529886	20389126	26108894	21734595	83.2
				2	28426934	23731687
				3	25369861	21082972
			E-L 38	1	21925699	18106005	20589684	17083280	83
				2	18779377	15641181
				3	21063977	17502655
		Winter	E-L 35	1	25358675	21138592	23854915	19936926	83.6
				2	21545602	18000707
				3	24660467	20671478
			E-L 36	1	21829495	18162439	34617308	28818537	83.2
				2	31565767	26568366
				3	50456662	41724805
			E-L 38	1	20851465	17084015	36564448	30492932	83.4
				2	63581863	53349388
				3	25260016	21045393
	Riesling	Summer	E-L 35	1	23213372	19278099	21572496	17717391	82.1
				2	23310104	18933466
				3	18,1940,12	14940608
			E-L 36	1	35121219	29653659	35058246	29405453	83.9
				2	33991630	28618487
				3	36061890	29944213
			E-L 38	1	23302725	19370448	23148144	19230427	83.1
				2	22449762	18727579
				3	23691946	19593255
		Winter	E-L 35	1	23133390	19325160	22051387	18221612	82.6
				2	23781127	19668987
				3	19239645	15670690
			E-L 36	1	21068110	17569735	24354583	20124287	82.6
				2	25045675	20896796
				3	26949963	21906330
			E-L 38	1	22547442	18970400	21958464	18402331	83.8
				2	22556360	18862131
				3	20771589	17374462
	Victoria	Summer	E-L 35	1	37108828	30635927	37895666	30782396	81.2
				2	42210016	33903309
				3	34368153	27807951
			E-L 36	1	27971555	23033420	22950252	19069936	83.1
				2	19634826	16432039
				3	21244375	17744348
			E-L 38	1	24131512	19876983	22165628	18215408	82.2
				2	18771647	15387285
				3	23593726	19381957
		Winter	E-L 35	1	21717759	16984346	22741392	13678905	60.1
				2	23770582	10259851
				3	22735836	13792519
			E-L 36	1	25929573	20591751	23825628	18856856	79.1
				2	22755463	17997549
				3	22791849	17981267
			E-L 38	1	19110027	14407054	20768525	16430356	79.1
				2	21359472	17246703
				3	21836076	17637310
	Muscat Hamburg	Summer	E-L 35	1	29377230	24906497	29316743	24891002	84.9
				2	29774885	25309225
				3	28798115	24457284
			E-L 36	1	21258865	18089736	22431807	19095527	85.1
				2	23945326	20392591
				3	22091229	18804255
			E-L 38	1	21914166	18624461	23332661	19842452	85
				2	21578246	18379019
				3	26505570	22523875
		Winter	E-L 35	1	18954744	15886415	21921981	18408853	84
				2	23932042	20052866
				3	22879158	19287278
			E-L 36	1	24802781	20830535	24988881	21001173	84
				2	25392323	21320049
				3	24771538	20852934
			E-L 38	1	19081929	16001437	23487572	19753418	84.1
				2	26531048	22335758
				3	24849738	20923058
	Quality criteria represent the percentage of raw reads that mapped onto the reference genome.

## Sheet: Supplementary Table 4
Supplementary Table 4. Concentrations of free volatile compounds in CS, R, MH, and V grapes during development stages (μg/L).
Compounds	Form	Class	14 summer (CS)					14 winter (CS)					15 summer (CS)					15 winter (CS)					14 summer (R)					14 winter (R)					15 summer (R)					15 winter (R)					14 summer (V)					14 winter (V)
			E-L 31	E-L 35	E-L 36	E-L 38		E-L 31	E-L 35	E-L 36	E-L 38		E-L 31	E-L 35	E-L 36	E-L 38		E-L 31	E-L 35	E-L 36	E-L 38		E-L 31	E-L 35	E-L 36	E-L 38		E-L 31	E-L 35	E-L 36	E-L 38		E-L 31	E-L 35	E-L 36	E-L 38		E-L 31	E-L 35	E-L 36	E-L 38		E-L 31	E-L 35	E-L 36	E-L 38		E-L 31	E-L 35
1-Hexanol	free	C6/C9	23.37±1.85	45.53±10.53	152.31±58.16	151.10±79.57		23.25±14.95	34.55±23.69	59.80±4.64	164.68±49.17		26.95±3.41	34.36±8.36	39.96±8.55	35.46±6.14		32.19±6.33	49.34±10.42	60.97±24.99	142.83±23.39		36.68±4.75	77.98±20.12	81.60±42.48	213.79±204.19		48.21±7.41	96.19±38.71	47.45±8.41	165.40±28.29		12.06±1.36	25.63±2.87	37.56±20.23	31.60±5.41		19.86±3.79	113.37±17.94	59.70±21.70	176.96±41.99		5.38±1.79	22.66±5.96	60.48±37.07	22.10±7.08		10.81±6.28	10.70±2.13
1-Nonanol	free	C6/C9	0.37±0.00	0.40±0.01	0.40±0.00	0.39±0.01		0.38±0.01	0.43±0.02	0.40±0.02	0.40±0.01		0.37±0.00	0.38±0.01	0.39±0.00	0.38±0.01		0.37±0.01	0.38±0.00	0.38±0.00	0.38±0.01		0.38±0.01	0.44±0.04	0.41±0.00	0.42±0.03		0.40±0.01	0.40±0.01	0.40±0.01	0.41±0.01		0.37±0.00	0.37±0.01	0.37±0.00	0.37±0.00		0.36±0.00	0.38±0.01	0.37±0.01	0.38±0.01		0.36±0.00	0.37±0.00	0.37±0.00	0.37±0.00		0.38±0.01	0.41±0.00
(E,E)-2,4-Hexadienal	free	C6/C9	51.33±5.70	98.85±7.38	109.43±6.39	113.67±6.71		67.77±9.42	125.93±4.60	125.77±2.45	103.52±6.65		49.36±2.96	78.70±3.29	74.51±2.88	66.51±2.71		46.45±3.01	87.04±2.95	79.07±0.82	59.45±1.41		36.15±0.86	82.35±8.92	105.25±8.80	72.55±10.61		63.86±8.51	101.60±5.28	105.57±8.15	100.58±10.53		48.66±1.80	66.87±4.53	67.25±5.51	63.00±1.48		53.38±2.29	76.65±1.78	88.03±4.22	76.64±0.88		41.59±2.43	50.69±0.94	49.74±3.78	48.61±2.70		52.21±6.78	58.20±2.53
(E,Z)-2,4-Hexadienal	free	C6/C9	40.22±3.01	61.54±2.58	72.99±8.79	66.28±3.44		46.15±3.63	71.69±2.80	71.28±2.28	63.49±3.35		40.36±2.35	51.22±2.66	50.84±1.56	46.11±1.08		37.77±0.71	53.42±1.71	51.58±0.55	42.87±0.74		33.15±0.36	55.11±3.63	66.51±3.09	57.97±4.52		45.51±4.09	63.25±2.92	63.96±2.71	62.93±4.03		38.58±0.87	47.73±2.13	48.08±2.63	45.46±0.51		40.69±1.21	55.12±1.50	58.10±2.44	54.06±0.89		35.90±1.39	40.40±0.54	41.33±2.32	39.19±1.37		41.14±3.60	43.47±1.36
(E,Z)-2,6-Nonadienal	free	C6/C9	2.31±0.02	2.44±0.05	2.58±0.07	2.61±0.09		2.43±0.01	2.61±0.04	2.61±0.05	2.49±0.01		2.33±0.02	2.37±0.02	2.48±0.03	2.48±0.03		2.31±0.02	2.32±0.01	2.41±0.01	2.36±0.01		2.29±0.01	2.59±0.08	2.59±0.09	2.65±0.03		2.49±0.12	2.89±0.03	2.75±0.08	2.64±0.04		0.07±0.02	0.22±0.01	0.14±0.02	0.21±0.04		0.07±0.01	0.10±0.01	0.11±0.01	0.10±0.00		2.31±0.02	2.50±0.03	2.45±0.03	2.43±0.05		2.36±0.03	2.55±0.05
(E)-2-Hexen-1-ol	free	C6/C9	14.04±2.82	67.92±3.77	471.84±337.94	98.06±14.57		11.81±4.98	31.92±21.84	80.49±7.01	202.09±60.13		17.81±3.84	39.86±10.80	87.33±66.66	22.39±0.93		35.54±24.32	110.70±13.69	67.49±36.86	96.50±10.81		25.75±6.45	104.37±3.58	88.59±43.67	450.08±482.00		28.46±6.43	77.04±27.49	79.01±3.14	141.40±9.64		8.59±1.25	19.86±1.85	52.74±27.57	18.54±3.41		11.34±2.93	200.40±93.42	65.30±16.44	143.68±20.45		4.83±1.17	22.76±10.72	91.90±34.14	16.27±5.17		9.92±7.51	9.72±2.41
(Z)-2-Hexen-1-ol	free	C6/C9	0.28±0.00	ND	3.06±1.45	1.44±0.27		ND	ND	ND	2.28±0.24		0.48±0.08	0.63±0.15	0.61±0.20	ND		0.46±0.06	ND	ND	ND		0.31±0.01	1.24±0.22	0.96±0.44	3.87±4.37		ND	2.84±0.93	ND	2.05±0.08		0.14±0.02	0.71±0.08	0.43±0.16	0.37±0.09		0.34±0.08	1.71±0.66	0.61±0.12	0.86±0.18		ND	ND	0.44±0.10	ND		ND	ND
(Z)-2-Hexen-1-yl acetate	free	C6/C9	ND	ND	ND	ND		ND	ND	ND	ND		ND	ND	ND	ND		ND	ND	ND	ND		0.83±0.03	ND	ND	0.31±0.54		0.86±0.06	ND	ND	0.83±0.01		0.78±0.01	ND	ND	ND		ND	0.84±0.03	ND	ND		ND	ND	ND	ND		ND	ND
(E)-2-Hexenal	free	C6/C9	1,048.83±44.74	9,069.14±637.26	10,275.89±441.97	9,533.81±801.82		3,751.27±805.83	11,961.97±727.95	11,360.53±1,216.09	7,631.90±639.85		1,934.44±285.47	6,139.47±1,101.43	5,676.82±470.48	4,587.12±392.35		1,720.34±515.68	5,777.10±385.59	6,153.74±171.31	2,853.32±133.88		621.58±117.34	7,414.72±1,204.91	9,993.11±1,174.24	6,371.80±1,613.33		4,358.40±1,023.84	10,979.29±910.51	9,844.65±1,013.12	9,372.61±723.94		1,797.38±121.21	4,983.53±546.17	4,991.07±824.55	4,615.25±205.73		2,769.17±379.96	6,288.68±240.19	6,140.07±214.80	5,644.32±365.28		588.95±202.77	3,321.30±148.69	2,290.53±500.63	2,270.05±469.29		1,893.51±522.00	4,626.96±264.30
(Z)-2-Hexenal	free	C6/C9	46.46±0.94	173.33±12.85	187.23±6.09	171.95±12.71		73.97±11.53	171.04±4.71	209.82±15.41	130.96±10.24		58.00±4.96	127.17±21.98	125.02±8.52	105.80±6.93		54.78±4.86	115.25±7.32	118.25±3.47	71.48±1.79		38.51±0.61	135.38±19.74	180.51±18.60	118.37±26.84		85.97±10.18	185.05±17.08	168.68±14.33	162.21±10.35		61.30±1.41	114.59±11.03	111.60±14.69	105.10±5.01		70.34±6.59	137.02±5.40	141.92±4.53	126.90±7.28		50.57±6.37	99.67±3.33	76.87±10.50	75.88±9.58		86.56±16.40	121.62±6.14
Hexanal	free	C6/C9	105.25±8.89	2,330.66±538.83	3,770.92±520.59	4,739.99±400.05		714.56±192.15	3,054.23±533.09	4,715.04±385.40	5,681.21±409.26		183.64±30.02	1,650.64±443.40	3,656.24±151.68	3,137.59±149.17		176.95±41.47	1,610.09±310.80	3,735.95±153.37	3,959.38±298.34		58.51±1.41	2,736.75±433.27	4,762.91±358.27	2,371.15±657.80		759.43±489.66	3,544.38±187.48	4,812.78±750.27	6,948.84±688.68		341.81±25.09	1,942.51±266.30	2,926.08±813.50	2,570.27±123.51		394.39±98.75	2,911.52±177.72	3,451.10±370.13	3,676.96±264.27		293.74±88.97	1,942.01±232.27	1,583.22±341.59	1,920.84±372.20		1,052.42±167.17	3,014.97±292.19
2-Nonanol	free	C6/C9	ND	ND	ND	ND		ND	ND	ND	ND		ND	ND	ND	ND		ND	ND	ND	ND		0.36±0.01	0.37±0.01	ND	0.36±0.01		0.36±0.01	ND	ND	ND		ND	ND	ND	ND		ND	ND	ND	ND		ND	ND	ND	ND		ND	ND
Nonanal	free	C6/C9	1.53±0.50	10.75±1.61	18.60±4.77	21.07±2.81		6.03±1.46	19.24±0.89	22.20±2.45	17.24±2.67		1.59±0.13	5.70±1.00	14.81±1.20	15.02±1.20		1.97±0.30	7.58±1.99	18.57±4.74	14.13±2.01		0.77±0.13	26.52±3.48	30.44±3.95	32.11±9.95		4.68±2.43	22.53±1.90	24.39±1.91	22.96±3.14		1.77±0.34	10.57±2.38	19.86±0.88	15.29±2.63		3.52±1.07	12.96±0.52	10.75±2.97	12.56±1.25		1.48±0.34	24.96±2.73	4.83±1.97	5.38±1.22		4.71±0.65	13.21±1.58
(E)-2-Nonenal	free	C6/C9	1.88±0.00	1.96±0.01	2.03±0.03	2.11±0.03		1.96±0.01	2.07±0.06	2.18±0.02	2.06±0.01		1.90±0.00	1.95±0.03	2.16±0.04	2.10±0.03		1.90±0.02	1.92±0.01	2.02±0.01	1.98±0.02		1.88±0.00	2.03±0.04	2.22±0.11	2.06±0.02		2.00±0.06	2.12±0.01	2.10±0.03	2.18±0.05		1.91±0.01	2.00±0.02	2.01±0.05	2.05±0.01		1.92±0.00	1.93±0.01	1.95±0.02	1.97±0.01		1.90±0.02	2.10±0.03	2.02±0.02	2.00±0.05		1.95±0.03	2.10±0.04
(Z)-3-Hexen-1-ol	free	C6/C9	241.29±14.08	101.61±20.30	53.91±19.54	21.85±6.58		62.26±28.44	79.91±55.39	101.60±7.07	52.07±12.70		139.09±29.51	104.14±17.78	28.20±7.65	4.51±1.23		137.20±46.36	150.81±17.33	46.41±27.50	17.55±1.40		265.31±41.94	51.42±10.40	28.73±3.39	52.03±24.49		80.38±5.16	71.20±15.10	23.80±0.33	20.77±1.26		51.56±4.22	27.46±3.26	18.93±4.96	5.11±0.75		60.90±5.31	94.37±10.53	19.83±1.15	10.97±0.51		27.17±7.31	14.00±3.33	12.20±2.50	5.43±1.07		35.95±21.41	5.42±0.35
(Z)-3-Hexen-1-yl acetate	free	C6/C9	8.30±0.35	1.27±0.06	1.08±0.03	ND		4.42±0.65	6.19±3.08	3.52±0.03	1.39±0.09		17.74±4.36	6.19±1.93	0.92±0.05	ND		5.25±1.73	4.42±0.81	1.58±0.25	ND		8.44±3.00	0.98±0.05	0.91±0.15	0.91±0.03		3.51±0.53	2.16±0.06	ND	1.06±0.01		2.01±0.15	1.48±0.23	ND	ND		2.71±0.14	2.07±0.29	ND	ND		1.47±0.08	0.80±0.00	ND	ND		3.30±1.39	ND
(E)-3-Hexen-1-ol	free	C6/C9	0.81±0.14	1.37±0.06	4.09±1.84	2.41±0.44		0.85±0.10	1.55±0.33	2.05±0.13	3.13±0.71		0.82±0.14	1.05±0.13	1.31±0.26	1.45±0.18		1.01±0.13	1.39±0.16	1.56±0.34	1.57±0.19		1.21±0.20	1.43±0.31	1.71±0.71	3.68±3.13		1.02±0.01	2.16±0.45	1.14±0.03	3.33±0.45		0.57±0.02	0.89±0.10	1.07±0.34	1.06±0.11		0.66±0.06	1.95±0.37	1.38±0.32	2.24±0.33		0.53±0.06	0.63±0.08	1.03±0.29	0.73±0.12		0.65±0.14	ND
(Z)-3-Hexenal	free	C6/C9	57.42±1.28	135.67±13.84	135.14±13.92	129.29±14.98		76.56±12.56	167.03±11.39	164.38±5.04	122.06±13.42		50.57±3.85	97.39±14.78	90.72±4.02	78.32±4.90		47.76±3.17	86.41±6.86	95.50±1.77	61.17±2.89		31.63±0.52	102.61±14.35	144.16±12.76	95.83±21.87		75.23±13.12	156.23±14.08	139.21±10.22	129.79±11.73		51.21±2.74	86.53±6.90	85.55±12.82	82.24±5.61		63.04±5.04	107.10±6.43	130.06±35.88	97.55±4.91		81.21±14.74	111.25±5.43	102.51±13.95	98.35±12.16		146.25±45.26	146.48±11.87
(E)-3-Hexenyl butanoate	free	C6/C9	3.99±0.09	3.10±0.09	ND	ND		3.41±0.53	3.35±0.35	3.11±0.09	ND		7.94±1.07	4.05±0.55	2.82±0.03	ND		3.74±0.25	3.25±0.16	2.92±0.01	ND		0.12±0.05	0.02±0.03	ND	ND		0.14±0.05	0.05±0.01	ND	ND		0.06±0.01	0.02±0.00	ND	ND		0.09±0.03	0.03±0.00	ND	ND		ND	ND	ND	ND		ND	ND
Hexyl acetate	free	C6/C9	0.97±0.00	ND	ND	ND		0.91±0.03	1.05±0.11	1.03±0.04	1.01±0.08		1.15±0.06	1.00±0.11	ND	ND		0.89±0.05	0.87±0.02	0.85±0.02	0.79±0.00		ND	ND	ND	ND		ND	ND	ND	ND		ND	ND	ND	ND		ND	ND	ND	ND		0.80±0.01	ND	ND	ND		0.88±0.05	ND
Ethyl hexanoate	free	C6/C9	ND	ND	ND	ND		ND	ND	ND	ND		ND	ND	ND	ND		ND	ND	ND	ND		ND	ND	ND	ND		ND	ND	ND	ND		ND	ND	ND	ND		ND	ND	ND	ND		9.09±0.02	ND	9.09±0.01	9.10±0.01		9.03±0.00	ND
Camphene	free	Terpenes	ND	ND	ND	ND		ND	ND	ND	ND		ND	ND	ND	ND		ND	ND	ND	ND		ND	ND	ND	ND		ND	ND	ND	ND		ND	ND	ND	ND		ND	ND	ND	ND		ND	ND	ND	ND		ND	ND
2H-Pyran, 2-ethenyltetrahydro-2,6,6-trimethyl-	free	Terpenes	ND	ND	ND	ND		ND	ND	ND	ND		ND	ND	ND	ND		ND	ND	ND	ND		3.60±0.13	1.61±0.32	ND	1.06±0.08		1.43±0.20	1.11±0.04	1.02±0.04	0.90±0.04		1.88±0.27	1.18±0.05	ND	ND		1.02±0.08	0.90±0.01	ND	ND		0.90±0.12	ND	ND	ND		0.98±0.12	0.89±0.03
Cyclohexene, 1,5,5-trimethyl-3-methylene-	free	Terpenes	ND	ND	ND	ND		ND	ND	ND	ND		ND	ND	ND	ND		ND	ND	ND	ND		ND	ND	ND	ND		ND	ND	ND	ND		ND	ND	ND	ND		ND	ND	ND	ND		ND	ND	ND	ND		ND	ND
β-Myrcene	free	Terpenes	ND	ND	ND	ND		ND	ND	ND	ND		ND	ND	ND	ND		ND	ND	ND	ND		1.49±0.12	2.80±0.54	2.14±0.21	2.54±0.31		4.91±1.20	6.89±1.05	5.33±0.62	4.14±0.29		1.60±0.06	2.21±0.17	1.21±0.15	1.32±0.42		3.60±0.49	3.27±0.09	2.13±0.24	1.89±0.08		ND	ND	ND	ND		ND	ND
α-phellandrene	free	Terpenes	ND	ND	ND	ND		ND	ND	ND	ND		ND	ND	ND	ND		ND	ND	ND	ND		ND	ND	ND	ND		ND	ND	ND	ND		ND	ND	ND	ND		ND	ND	ND	ND		ND	ND	ND	ND		ND	ND
1,4-Cineol	free	Terpenes	1.58±0.18	1.37±0.11	0.96±0.06	0.89±0.03		1.73±0.32	1.97±0.08	1.37±0.15	1.09±0.03		1.83±0.17	1.40±0.06	0.80±0.01	0.78±0.00		1.21±0.19	1.51±0.08	0.95±0.02	0.82±0.02		3.06±0.41	1.28±0.24	0.86±0.02	1.06±0.06		2.20±0.12	2.05±0.23	1.44±0.06	1.00±0.01		2.21±0.32	1.57±0.15	0.81±0.01	0.84±0.02		1.44±0.13	1.23±0.14	0.95±0.04	0.91±0.02		ND	ND	ND	ND		ND	ND
α-Terpinene	free	Terpenes	5.92±0.37	2.56±0.50	1.64±0.29	1.99±0.40		5.78±2.76	6.97±0.76	5.66±0.32	4.96±1.04		7.44±0.51	2.73±0.12	1.08±0.01	0.88±0.13		3.35±1.26	3.59±0.14	2.31±0.18	1.53±0.40		9.34±1.85	4.59±1.69	3.13±0.57	4.38±1.07		26.34±5.73	20.52±3.88	13.32±2.42	7.76±1.00		9.27±0.57	7.26±1.26	1.76±0.23	1.98±0.49		12.64±0.70	10.32±2.37	4.86±2.06	4.95±0.33		ND	ND	ND	ND		ND	ND
D-Limonene	free	Terpenes	2.09±0.06	ND	ND	ND		2.07±0.09	2.22±0.35	ND	ND		1.86±0.05	1.75±0.01	ND	ND		1.77±0.05	1.79±0.02	ND	ND		3.18±0.07	2.44±0.22	ND	2.12±0.05		4.76±0.36	3.30±0.48	2.83±0.13	2.42±0.09		2.74±0.11	2.19±0.05	ND	ND		3.41±0.18	2.35±0.17	1.89±0.02	1.85±0.01		1.75±0.05	ND	ND	ND		1.76±0.04	1.75±0.01
Eucalyptol	free	Terpenes	11.48±1.03	ND	ND	ND		25.35±4.15	31.26±1.08	11.32±1.97	4.49±0.31		22.14±1.32	12.54±0.81	ND	ND		14.18±4.77	13.48±0.48	4.90±0.24	ND		13.44±2.18	0.90±0.02	ND	ND		25.25±7.41	11.11±1.68	2.64±0.15	1.06±0.15		18.83±0.63	2.88±0.38	ND	ND		18.98±0.89	2.53±0.55	ND	ND		ND	ND	ND	ND		ND	ND
β-Phellandrene	free	Terpenes	ND	ND	ND	ND		ND	ND	ND	ND		ND	ND	ND	ND		ND	ND	ND	ND		ND	ND	ND	ND		ND	ND	ND	ND		ND	ND	ND	ND		ND	ND	ND	ND		ND	ND	ND	ND		ND	ND
(Z)-β-Ocimene	free	Terpenes	ND	ND	ND	ND		ND	ND	ND	ND		ND	ND	ND	ND		ND	ND	ND	ND		1.15±0.05	1.33±0.22	0.89±0.06	1.07±0.12		1.79±0.10	1.71±0.29	1.59±0.09	1.44±0.05		0.93±0.02	0.85±0.03	0.71±0.04	0.75±0.10		1.33±0.15	1.02±0.08	1.86±1.81	0.72±0.00		0.74±0.10	ND	ND	ND		0.79±0.08	0.87±0.04
Furan, tetrahydro-2,2-dimethyl-5-(1-methyl-1-propenyl)-	free	Terpenes	ND	ND	ND	ND		ND	ND	ND	ND		ND	ND	ND	ND		ND	ND	ND	ND		1.10±0.06	ND	ND	ND		ND	ND	ND	ND		0.87±0.04	0.78±0.00	ND	ND		ND	ND	ND	ND		ND	ND	ND	ND		ND	ND
γ-Terpinene	free	Terpenes	13.24±2.59	5.19±1.09	3.53±0.82	3.47±0.52		14.18±3.50	15.46±1.86	11.07±1.29	8.16±1.81		15.80±0.69	5.68±0.35	1.67±0.09	1.41±0.27		7.50±3.27	8.15±0.19	4.20±0.41	2.30±0.71		39.73±7.74	10.90±4.43	5.09±0.97	9.00±2.49		66.21±9.42	46.15±7.65	31.18±6.10	16.16±1.58		32.22±1.33	18.19±3.45	3.10±0.34	3.68±0.96		27.98±1.65	21.49±5.56	9.57±1.37	8.39±0.42		ND	0.78±0.31	ND	ND		0.80±0.28	0.77±0.02
(E)-β-Ocimene	free	Terpenes	ND	ND	ND	ND		ND	ND	ND	ND		ND	ND	ND	ND		ND	ND	ND	ND		1.32±0.06	1.81±0.24	1.12±0.10	1.47±0.25		2.59±0.26	2.30±0.43	2.29±0.22	2.02±0.08		1.03±0.02	0.99±0.07	0.81±0.04	0.87±0.18		1.85±0.25	1.32±0.12	1.90±1.61	0.82±0.00		0.89±0.20	0.77±0.06	ND	ND		0.92±0.13	1.08±0.03
3,8-p-Menthadiene	free	Terpenes	ND	ND	ND	ND		ND	ND	ND	ND		ND	ND	ND	ND		ND	ND	ND	ND		ND	ND	ND	ND		ND	ND	ND	ND		ND	ND	ND	ND		ND	ND	ND	ND		ND	ND	ND	ND		ND	ND
Terpinolene	free	Terpenes	3.87±0.68	2.13±0.39	1.46±0.20	1.36±0.13		4.80±1.12	4.89±0.53	3.74±0.24	2.52±0.48		4.01±0.44	1.86±0.09	0.77±0.05	0.66±0.09		2.05±0.80	2.51±0.12	1.34±0.08	0.83±0.16		8.47±1.02	5.70±1.99	2.69±0.43	4.12±0.86		26.34±4.87	18.74±3.34	12.97±1.63	7.59±0.63		7.23±0.78	6.30±0.99	1.48±0.09	1.85±0.64		13.06±0.61	8.91±1.60	3.69±0.56	3.32±0.15		0.72±0.31	0.47±0.08	ND	ND		0.89±0.24	0.93±0.04
Isoterpinolene	free	Terpenes	ND	ND	ND	ND		ND	ND	ND	ND		ND	ND	ND	ND		ND	ND	ND	ND		0.63±0.06	ND	ND	ND		1.12±0.18	1.00±0.15	0.75±0.08	0.56±0.04		0.69±0.03	0.60±0.04	ND	ND		0.71±0.00	0.62±0.06	0.48±0.05	0.44±0.00		ND	ND	ND	ND		ND	ND
Rose oxide	free	Terpenes	ND	ND	ND	ND		ND	ND	ND	ND		ND	ND	ND	ND		ND	ND	ND	ND		0.85±0.00	ND	ND	ND		0.87±0.00	ND	ND	ND		0.84±0.00	ND	ND	ND		0.85±0.00	ND	ND	0.84±0.00		ND	ND	ND	ND		ND	ND
trans-rose oxide	free	Terpenes	ND	ND	ND	ND		ND	ND	ND	ND		ND	ND	ND	ND		ND	ND	ND	ND		ND	ND	ND	ND		ND	ND	ND	ND		ND	ND	ND	ND		ND	ND	ND	ND		ND	ND	ND	ND		ND	ND
(E,Z)-alloociene	free	Terpenes	ND	ND	ND	ND		ND	ND	ND	ND		ND	ND	ND	ND		ND	ND	ND	ND		1.02±0.04	1.06±0.15	0.80±0.01	0.87±0.05		1.40±0.06	1.24±0.17	1.18±0.07	1.10±0.05		0.83±0.02	0.74±0.03	0.64±0.02	0.66±0.06		1.05±0.09	0.83±0.04	0.70±0.01	0.65±0.00		ND	ND	ND	ND		ND	ND
(E,E)-alloociene	free	Terpenes	ND	ND	ND	ND		ND	ND	ND	ND		ND	ND	ND	ND		ND	ND	ND	ND		ND	ND	ND	ND		ND	ND	ND	ND		ND	ND	ND	ND		ND	ND	ND	ND		0.69±0.06	ND	ND	ND		0.73±0.06	0.74±0.01
cis-Furan linalool oxide	free	Terpenes	1.47±0.16	2.50±0.36	1.93±0.38	1.40±0.11		2.07±0.25	2.59±0.58	2.46±0.36	1.61±0.03		1.70±0.65	1.18±0.02	0.67±0.05	0.68±0.09		1.20±0.46	1.42±0.02	0.75±0.09	0.56±0.04		24.86±2.59	17.21±4.58	5.66±1.28	6.80±0.39		50.60±8.22	28.73±9.07	44.90±6.59	25.13±2.51		42.05±10.58	18.41±1.49	3.60±0.16	2.45±0.51		18.53±4.41	12.41±0.61	5.86±1.60	4.58±0.89		1.56±1.30	0.56±0.12	0.38±0.09	0.45±0.16		1.89±0.64	1.55±0.21
1,3,8-p-Menthatriene	free	Terpenes	1.22±0.01	1.26±0.03	ND	ND		1.36±0.07	1.43±0.07	1.33±0.05	ND		1.17±0.02	1.20±0.02	1.14±0.01	1.11±0.02		1.19±0.03	1.24±0.02	1.20±0.01	ND		1.26±0.03	ND	1.54±0.05	1.42±0.15		1.79±0.19	2.43±0.03	1.95±0.13	1.57±0.21		1.33±0.04	1.23±0.09	1.30±0.06	1.29±0.05		1.46±0.07	1.44±0.03	1.32±0.06	1.35±0.04		ND	ND	ND	ND		ND	ND
trans-Furan linalool oxide	free	Terpenes	1.15±0.10	1.18±0.20	0.81±0.11	0.71±0.06		1.08±0.19	1.28±0.30	0.97±0.24	0.76±0.05		1.09±0.29	0.60±0.06	0.55±0.02	0.47±0.07		0.76±0.25	0.63±0.10	0.42±0.06	0.33±0.04		5.95±0.86	5.00±1.05	2.13±0.30	2.28±0.18		13.39±2.28	8.52±2.94	13.32±1.91	8.07±0.78		10.59±2.56	5.24±0.38	1.23±0.10	0.91±0.17		4.98±1.09	3.63±0.24	1.95±0.52	1.47±0.27		0.74±0.54	ND	ND	ND		0.73±0.18	0.60±0.05
Nerol oxide	free	Terpenes	0.91±0.03	0.92±0.01	0.88±0.03	0.85±0.00		1.10±0.05	1.17±0.10	1.06±0.03	0.92±0.01		0.90±0.00	0.89±0.00	0.84±0.00	0.84±0.00		0.94±0.05	1.02±0.01	0.89±0.00	0.85±0.00		1.24±0.03	1.06±0.07	0.89±0.01	0.92±0.02		1.88±0.21	1.59±0.13	1.58±0.17	1.19±0.06		1.64±0.27	1.09±0.04	0.87±0.00	0.86±0.01		1.47±0.17	1.13±0.01	0.91±0.02	0.89±0.01		0.86±0.03	0.84±0.00	ND	ND		0.93±0.04	0.93±0.02
Citronellal	free	Terpenes	ND	ND	ND	ND		ND	ND	ND	ND		ND	ND	ND	ND		ND	ND	ND	ND		ND	ND	ND	ND		ND	ND	ND	ND		ND	ND	ND	ND		ND	ND	ND	ND		ND	ND	ND	ND		ND	ND
Camphor	free	Terpenes	ND	ND	ND	ND		ND	ND	ND	ND		ND	ND	ND	ND		ND	ND	ND	ND		ND	ND	ND	ND		ND	ND	ND	ND		ND	ND	ND	ND		ND	ND	ND	ND		0.28±0.03	0.33±0.05	0.26±0.02	0.24±0.02		0.29±0.03	0.41±0.03
Bornylene	free	Terpenes	1.24±0.06	0.89±0.04	0.79±0.05	0.69±0.04		1.02±0.12	1.46±0.19	0.92±0.28	0.70±0.03		0.67±0.03	0.63±0.01	0.40±0.01	0.40±0.02		0.70±0.17	0.86±0.01	0.54±0.01	0.47±0.04		8.76±0.86	4.13±0.75	1.13±0.18	3.41±0.74		10.80±1.98	10.32±0.96	8.00±0.55	3.99±0.10		4.73±1.01	2.69±0.26	0.76±0.02	0.78±0.10		5.16±0.87	3.01±0.45	1.62±0.20	2.20±0.28		0.49±0.14	0.40±0.05	ND	ND		0.84±0.27	0.67±0.03
Linalool	free	Terpenes	0.81±0.03	1.39±0.45	1.05±0.01	0.82±0.05		1.19±0.31	1.22±0.05	0.87±0.06	0.62±0.03		0.59±0.11	0.55±0.05	0.57±0.06	0.49±0.04		0.48±0.08	0.48±0.05	0.43±0.01	0.39±0.01		0.88±0.14	3.27±0.49	2.12±0.33	2.62±0.54		5.80±1.26	5.30±1.86	5.72±0.32	4.86±0.16		0.96±0.15	1.49±0.16	0.93±0.12	1.37±0.88		5.58±1.41	3.01±0.55	1.66±0.13	1.22±0.04		1.23±0.55	0.71±0.19	0.46±0.08	0.50±0.07		1.07±0.30	1.46±0.14
p-Menthan-8-ol	free	Terpenes	0.16±0.02	ND	ND	ND		0.15±0.02	0.25±0.05	ND	ND		0.93±0.24	0.52±0.12	0.23±0.03	0.23±0.03		0.13±0.01	0.17±0.01	0.14±0.01	0.13±0.01		0.05±0.01	ND	0.19±0.03	ND		ND	ND	ND	ND		2.43±0.55	0.77±0.13	0.08±0.01	0.19±0.05		0.02±0.00	ND	ND	ND		ND	ND	ND	ND		ND	ND
α-Cedrene	free	Terpenes	1.17±0.31	0.97±0.14	1.08±0.13	ND		1.52±0.74	4.41±0.89	ND	ND		0.54±0.07	0.74±0.04	0.35±0.05	0.37±0.09		0.66±0.16	1.24±0.18	0.49±0.14	0.43±0.07		ND	ND	ND	ND		ND	ND	ND	ND		ND	ND	ND	ND		ND	ND	ND	ND		ND	ND	ND	ND		ND	ND
p-Menth-3-en-1-ol	free	Terpenes	0.25±0.04	0.32±0.03	0.26±0.04	0.25±0.01		0.38±0.02	0.55±0.08	0.37±0.03	0.28±0.03		0.27±0.01	0.26±0.02	ND	ND		0.22±0.06	0.37±0.05	0.20±0.01	0.15±0.01		1.10±0.21	0.53±0.09	ND	0.34±0.07		0.78±0.03	1.01±0.15	0.57±0.05	0.20±0.18		0.79±0.17	0.56±0.08	0.15±0.01	0.16±0.02		0.36±0.07	0.33±0.08	0.25±0.05	0.20±0.02		ND	ND	ND	ND		ND	ND
Terpinen-4-ol	free	Terpenes	2.41±0.16	1.59±0.15	1.27±0.14	1.16±0.08		2.62±0.22	3.16±0.44	2.25±0.17	1.63±0.16		2.36±0.10	1.54±0.08	0.93±0.03	0.88±0.04		1.42±0.29	2.01±0.04	1.21±0.02	1.44±0.60		5.40±0.54	3.09±0.87	1.50±0.11	2.45±0.41		9.77±1.38	8.56±0.87	5.86±0.44	3.17±0.06		4.43±0.37	4.11±0.54	1.11±0.09	1.14±0.13		4.64±0.65	3.59±0.86	2.13±0.37	1.96±0.06		ND	0.78±0.05	ND	ND		0.80±0.04	0.86±0.03
Myrcenol	free	Terpenes	ND	ND	ND	ND		ND	ND	ND	ND		ND	ND	ND	ND		ND	ND	ND	ND		ND	ND	ND	ND		ND	ND	ND	ND		ND	ND	ND	ND		ND	ND	ND	ND		ND	ND	ND	ND		ND	ND
Hotrienol	free	Terpenes	3.10±0.37	2.55±0.79	1.41±0.08	1.37±0.11		9.80±2.47	10.05±2.85	8.49±0.27	3.20±0.42		2.26±0.31	1.93±0.16	0.90±0.06	0.88±0.04		3.56±1.18	5.08±0.77	2.74±0.23	1.13±0.11		2.70±0.34	4.35±1.89	2.74±0.54	2.37±0.68		25.07±7.51	16.74±5.56	18.74±4.94	10.87±1.65		10.59±1.30	5.17±0.53	1.94±0.11	1.32±0.32		19.22±6.10	10.78±1.07	3.96±0.89	1.93±0.22		2.25±1.49	1.11±0.19	0.79±0.04	0.84±0.12		3.52±0.79	4.35±0.67
p-Menth-1-en-9-al	free	Terpenes	ND	ND	ND	ND		ND	ND	ND	ND		ND	ND	ND	ND		ND	ND	ND	ND		0.14±0.01	ND	ND	ND		0.25±0.03	0.32±0.04	0.36±0.00	0.32±0.04		0.13±0.00	0.14±0.00	ND	ND		0.18±0.02	0.18±0.01	0.17±0.03	0.16±0.01		0.18±0.06	ND	ND	ND		0.23±0.04	0.29±0.02
p-Menth-8-en-1-ol	free	Terpenes	ND	ND	ND	ND		ND	ND	ND	ND		ND	ND	ND	ND		ND	ND	ND	ND		0.19±0.02	ND	ND	ND		0.23±0.02	0.27±0.01	0.22±0.01	ND		0.18±0.01	0.17±0.01	ND	ND		0.15±0.01	0.16±0.02	ND	ND		ND	ND	ND	ND		ND	ND
Menthol	free	Terpenes	0.86±0.03	1.50±0.19	1.73±0.03	1.32±0.11		1.02±0.07	1.74±0.31	1.27±0.07	1.10±0.02		0.85±0.01	0.99±0.05	1.12±0.06	1.01±0.06		0.94±0.11	1.04±0.11	1.06±0.02	0.99±0.09		0.93±0.02	1.67±0.26	1.31±0.03	1.95±0.41		1.05±0.08	1.45±0.13	1.32±0.11	1.27±0.01		0.87±0.01	1.04±0.06	0.99±0.06	0.98±0.03		0.85±0.03	1.20±0.01	0.97±0.06	1.02±0.01		0.79±0.02	1.11±0.06	1.05±0.12	0.94±0.09		0.91±0.06	1.27±0.01
cis-Ocimenol	free	Terpenes	ND	ND	ND	ND		ND	ND	ND	ND		ND	ND	ND	ND		ND	ND	ND	ND		1.69±0.09	1.11±0.17	ND	0.84±0.05		0.90±0.08	0.87±0.01	ND	ND		1.06±0.09	0.85±0.03	ND	ND		0.75±0.02	0.75±0.00	ND	ND		0.73±0.02	ND	ND	ND		0.90±0.02	0.77±0.02
Isoborneol	free	Terpenes	0.32±0.06	ND	ND	ND		0.29±0.00	0.35±0.05	0.35±0.04	0.31±0.03		0.64±0.13	0.29±0.01	ND	0.23±0.02		0.24±0.02	0.28±0.00	0.24±0.01	ND		ND	ND	ND	ND		ND	ND	ND	ND		0.57±0.07	ND	ND	ND		ND	ND	ND	ND		ND	ND	ND	ND		ND	ND
trans-Ocimenol	free	Terpenes	ND	ND	ND	ND		ND	ND	ND	ND		ND	ND	ND	ND		ND	ND	ND	ND		1.49±0.10	1.03±0.13	ND	ND		0.94±0.11	0.92±0.04	0.89±0.04	ND		1.03±0.06	0.83±0.01	ND	ND		0.76±0.01	0.77±0.01	ND	ND		0.75±0.03	ND	ND	ND		0.94±0.04	0.79±0.00
Neral	free	Terpenes	ND	ND	ND	ND		ND	ND	ND	ND		ND	ND	ND	ND		ND	ND	ND	ND		ND	ND	ND	ND		1.15±0.18	1.21±0.03	1.22±0.06	1.31±0.20		1.06±0.07	1.09±0.04	ND	ND		0.95±0.05	0.93±0.03	ND	ND		ND	ND	ND	ND		ND	ND
α-Terpineol	free	Terpenes	0.95±0.14	1.32±0.21	0.86±0.14	0.62±0.03		1.54±0.21	1.91±0.35	1.69±0.93	0.71±0.11		0.88±0.06	0.71±0.11	0.33±0.04	0.33±0.04		0.62±0.21	0.99±0.03	0.42±0.02	0.27±0.05		4.95±0.41	5.75±1.64	1.37±0.01	3.09±0.48		10.85±0.81	10.41±1.56	7.88±0.88	4.84±0.15		4.80±0.31	4.12±0.48	0.69±0.09	0.99±0.51		5.35±0.95	3.64±0.58	1.82±0.52	1.34±0.03		0.46±0.27	0.28±0.10	0.18±0.03	0.21±0.04		0.71±0.26	0.91±0.03
γ-Terpineol	free	Terpenes	ND	ND	ND	ND		ND	ND	ND	ND		ND	ND	ND	ND		ND	ND	ND	ND		0.50±0.10	0.36±0.06	ND	0.28±0.03		0.58±0.03	0.72±0.07	0.52±0.04	0.30±0.00		0.41±0.05	0.38±0.05	0.14±0.01	0.15±0.01		0.30±0.05	0.31±0.06	0.21±0.04	0.19±0.01		ND	ND	ND	ND		ND	ND
p-Mentha-1,5-dien-8-ol	free	Terpenes	ND	ND	ND	ND		ND	ND	ND	ND		ND	ND	ND	ND		ND	ND	ND	ND		ND	ND	ND	ND		0.35±0.21	0.33±0.05	0.29±0.02	0.28±0.03		0.16±0.00	0.18±0.01	ND	ND		0.37±0.08	0.32±0.03	0.19±0.01	0.16±0.01		ND	ND	ND	ND		ND	ND
Geranial	free	Terpenes	ND	ND	ND	ND		ND	ND	ND	ND		ND	ND	ND	ND		ND	ND	ND	ND		1.38±0.08	0.37±0.64	1.29±0.24	ND		1.10±0.06	ND	ND	ND		ND	ND	ND	ND		0.96±0.03	1.02±0.09	1.05±0.12	ND		ND	ND	ND	ND		ND	ND
trans-Pyran linalool oxide	free	Terpenes	ND	ND	ND	ND		ND	ND	ND	ND		ND	ND	ND	ND		0.25±0.04	ND	ND	ND		0.63±0.17	ND	ND	ND		0.78±0.03	ND	ND	ND		0.38±0.02	ND	ND	ND		0.38±0.07	ND	ND	ND		ND	ND	ND	ND		0.43±0.07	ND
cis-Pyran linalool oxide	free	Terpenes	ND	ND	ND	ND		ND	ND	ND	ND		ND	ND	ND	ND		0.27±0.05	ND	ND	ND		0.86±0.25	ND	ND	ND		2.89±0.70	1.35±0.83	1.34±0.13	1.26±0.07		0.93±0.12	0.47±0.12	ND	ND		1.14±0.27	0.91±0.24	ND	0.54±0.16		ND	ND	ND	ND		ND	ND
p-Mentha-1(7),2-dien-8-ol	free	Terpenes	ND	ND	ND	ND		ND	ND	ND	ND		ND	ND	ND	ND		ND	ND	ND	ND		ND	ND	ND	ND		0.25±0.11	0.24±0.04	0.22±0.01	0.22±0.01		0.14±0.00	0.15±0.00	ND	ND		0.28±0.05	0.24±0.02	0.17±0.01	0.14±0.01		ND	ND	ND	ND		ND	ND
γ-Geraniol	free	Terpenes	ND	0.83±0.05	0.75±0.14	ND		0.71±0.32	ND	ND	ND		ND	ND	ND	ND		ND	ND	ND	ND		ND	0.58±0.51	0.54±0.48	0.52±0.45		0.99±0.15	ND	ND	ND		ND	ND	0.17±0.30	ND		0.57±0.02	0.60±0.06	0.60±0.06	ND		ND	ND	ND	ND		ND	ND
Citronellol	free	Terpenes	0.25±0.01	0.81±0.15	0.69±0.13	1.60±0.43		0.35±0.18	0.73±0.13	0.54±0.05	ND		0.23±0.02	ND	ND	ND		0.21±0.05	ND	ND	ND		ND	0.91±0.18	1.07±0.23	0.72±0.05		1.08±0.16	0.76±0.07	ND	0.79±0.16		ND	ND	0.35±0.12	ND		0.47±0.09	0.60±0.19	0.54±0.04	ND		ND	ND	ND	ND		ND	ND
Myrtenol	free	Terpenes	ND	ND	ND	ND		ND	ND	ND	ND		ND	ND	ND	ND		ND	ND	ND	ND		0.51±0.04	ND	ND	ND		1.16±0.19	0.80±0.02	ND	ND		0.44±0.01	ND	ND	ND		0.60±0.06	0.58±0.07	0.51±0.02	ND		ND	ND	ND	ND		ND	ND
Nerol	free	Terpenes	0.45±0.01	ND	ND	ND		0.52±0.08	ND	ND	ND		ND	ND	ND	ND		ND	ND	ND	ND		0.47±0.01	0.76±0.06	0.82±0.11	0.75±0.06		0.88±0.13	0.98±0.24	1.04±0.11	0.99±0.03		0.45±0.01	0.51±0.03	0.51±0.02	0.55±0.04		0.78±0.13	0.70±0.07	0.62±0.06	0.56±0.02		ND	ND	ND	ND		0.49±0.04	0.55±0.05
cis-Isogeraniol	free	Terpenes	ND	ND	ND	ND		ND	ND	ND	ND		ND	ND	ND	ND		ND	ND	ND	ND		ND	ND	ND	ND		ND	ND	ND	ND		ND	ND	ND	ND		ND	ND	ND	ND		ND	ND	ND	ND		ND	ND
trans-Isogeraniol	free	Terpenes	ND	ND	ND	ND		ND	ND	ND	ND		ND	ND	ND	ND		ND	ND	ND	ND		ND	ND	ND	ND		ND	ND	ND	ND		ND	ND	ND	ND		ND	ND	ND	ND		ND	ND	ND	ND		ND	ND
cis-Calamenene	free	Terpenes	1.32±0.01	1.27±0.01	1.20±0.01	ND		1.34±0.02	1.37±0.05	1.23±0.01	1.20±0.01		1.25±0.02	1.23±0.01	ND	ND		1.25±0.03	1.30±0.01	ND	ND		1.89±0.05	1.56±0.15	1.23±0.03	1.31±0.04		2.28±0.35	1.87±0.07	1.61±0.04	1.44±0.06		1.56±0.05	1.43±0.02	1.19±0.00	1.20±0.01		1.48±0.00	1.37±0.04	1.22±0.02	1.21±0.01		1.21±0.02	ND	ND	ND		1.28±0.03	1.23±0.01
Geraniol	free	Terpenes	0.77±0.08	2.04±0.83	2.29±0.50	2.69±2.06		1.16±0.39	1.36±0.05	1.31±0.02	1.24±0.03		0.59±0.04	0.79±0.02	1.11±0.31	1.42±0.16		0.55±0.03	0.77±0.17	0.84±0.06	0.85±0.05		0.59±0.09	2.30±0.38	3.38±2.13	2.68±0.77		2.71±0.38	2.76±0.98	2.90±0.24	3.98±0.30		0.71±0.09	1.30±0.09	1.83±1.02	1.23±0.17		2.37±0.41	2.95±0.90	5.35±1.18	3.12±0.42		0.98±0.32	1.61±0.40	1.63±0.68	1.84±0.25		0.91±0.15	1.68±0.28
p-Cymen-8-ol	free	Terpenes	0.24±0.03	0.26±0.02	0.21±0.03	ND		0.31±0.02	0.42±0.08	0.32±0.01	0.22±0.03		0.22±0.01	0.24±0.01	0.17±0.01	0.16±0.01		0.17±0.02	0.26±0.02	0.17±0.01	0.14±0.01		0.41±0.07	0.41±0.08	0.25±0.00	0.27±0.03		0.80±0.16	0.72±0.06	0.60±0.03	0.49±0.03		0.51±0.05	0.45±0.05	0.17±0.01	0.16±0.01		0.45±0.06	0.39±0.07	0.25±0.03	0.23±0.02		ND	ND	ND	ND		ND	ND
endo-Borneol	free	Terpenes	0.33±0.05	0.45±0.01	0.55±0.03	0.41±0.04		0.43±0.05	0.69±0.08	0.59±0.06	0.52±0.01		0.37±0.05	0.34±0.01	0.36±0.02	0.39±0.04		0.27±0.03	0.30±0.02	0.34±0.02	0.31±0.01		ND	0.56±0.17	0.41±0.02	0.71±0.19		0.41±0.05	0.54±0.03	0.58±0.01	0.62±0.07		0.28±0.01	0.31±0.01	0.29±0.01	0.38±0.03		0.26±0.00	0.31±0.02	0.28±0.01	0.28±0.00		0.23±0.02	0.40±0.04	0.24±0.02	0.24±0.02		0.27±0.03	0.31±0.02
α-Calacorene	free	Terpenes	2.17±0.08	1.78±0.10	1.34±0.01	1.23±0.02		2.25±0.23	2.08±0.14	1.72±0.01	1.57±0.04		1.60±0.08	1.52±0.01	1.21±0.00	1.19±0.00		1.55±0.13	1.68±0.08	1.27±0.02	1.25±0.00		2.44±0.24	1.96±0.31	1.45±0.11	1.57±0.12		4.50±1.18	3.59±0.09	2.91±0.40	2.27±0.25		2.32±0.13	1.97±0.06	1.28±0.03	1.29±0.04		2.37±0.05	2.58±0.31	1.52±0.06	1.53±0.06		1.69±0.06	1.25±0.03	1.24±0.02	1.22±0.02		2.17±0.24	2.03±0.31
Nerolidol	free	Terpenes	ND	ND	ND	ND		ND	ND	ND	ND		ND	ND	ND	ND		ND	ND	ND	ND		ND	ND	ND	ND		ND	ND	ND	ND		ND	ND	ND	ND		ND	ND	ND	ND		ND	ND	ND	ND		ND	ND
2,6-Dimethyl-3,7-octadiene-2,6-diol	free	Terpenes	ND	ND	ND	ND		ND	ND	ND	ND		ND	ND	ND	ND		ND	ND	ND	ND		ND	ND	ND	ND		ND	ND	ND	ND		ND	ND	ND	ND		ND	ND	ND	ND		ND	ND	ND	ND		ND	ND
Cadalene	free	Terpenes	0.38±0.00	0.46±0.01	0.37±0.00	0.34±0.00		0.56±0.02	0.57±0.07	0.42±0.00	0.38±0.01		0.35±0.01	0.37±0.00	0.33±0.00	0.32±0.00		0.36±0.01	0.42±0.01	0.34±0.00	0.33±0.00		0.45±0.02	0.51±0.08	0.38±0.02	0.40±0.01		0.86±0.18	0.95±0.08	0.65±0.06	0.53±0.03		0.46±0.02	0.49±0.00	0.35±0.01	0.34±0.00		0.56±0.02	0.53±0.03	0.37±0.00	0.36±0.00		0.34±0.00	0.33±0.00	0.33±0.00	0.32±0.00		0.38±0.01	0.38±0.02
Geranic acid	free	Terpenes	ND	ND	ND	ND		ND	ND	ND	ND		ND	ND	ND	ND		ND	ND	ND	ND		ND	ND	ND	ND		ND	ND	ND	ND		ND	ND	ND	ND		ND	ND	ND	ND		ND	ND	ND	ND		ND	ND
Carotol	free	Terpenes	1.29±0.01	ND	ND	ND		1.24±0.02	1.24±0.02	ND	ND		1.24±0.01	1.21±0.01	ND	ND		1.20±0.01	1.19±0.01	ND	ND		ND	ND	ND	ND		ND	ND	ND	ND		ND	ND	ND	ND		ND	ND	ND	ND		ND	ND	ND	ND		ND	ND
Humulene	free	Terpenes	ND	ND	ND	ND		ND	ND	ND	ND		ND	ND	ND	ND		ND	ND	ND	ND		4.89±0.83	ND	ND	ND		3.63±0.38	ND	ND	ND		ND	ND	ND	ND		ND	ND	ND	ND		ND	ND	ND	ND		ND	ND
α-Muurolene	free	Terpenes	ND	ND	ND	ND		ND	ND	ND	ND		ND	ND	ND	ND		ND	ND	ND	ND		4.34±0.29	4.57±0.57	ND	3.01±0.31		5.68±0.85	6.69±1.11	5.12±0.53	3.35±0.40		3.90±0.15	3.44±0.02	ND	ND		3.23±0.12	2.95±0.18	ND	ND		ND	ND	ND	ND		ND	ND
α-Curcumene	free	Terpenes	ND	ND	ND	ND		ND	ND	ND	ND		ND	ND	ND	ND		ND	ND	ND	ND		2.76±0.13	ND	ND	ND		2.90±0.20	ND	ND	ND		2.36±0.03	2.09±0.11	ND	ND		ND	ND	ND	ND		ND	ND	ND	ND		ND	ND
Cubenol	free	Terpenes	1.29±0.02	ND	ND	ND		1.20±0.02	ND	ND	ND		1.24±0.02	1.18±0.01	ND	ND		1.19±0.01	ND	ND	ND		1.28±0.03	ND	ND	ND		1.28±0.04	ND	ND	ND		1.19±0.00	ND	ND	ND		1.18±0.00	1.19±0.01	ND	ND		ND	ND	ND	ND		ND	ND
Isophorone	free	Terpenes	ND	0.57±0.50	0.84±0.01	0.85±0.01		0.85±0.03	0.83±0.02	0.80±0.01	0.81±0.03		ND	ND	0.82±0.01	0.82±0.01		ND	ND	ND	0.79±0.00		ND	ND	ND	ND		ND	ND	ND	ND		ND	ND	ND	ND		ND	ND	ND	ND		ND	ND	ND	ND		ND	ND
2,6,6- Trimethylcyclohexanone	free	Norisoprenoids	0.96±0.02	1.19±0.03	1.15±0.10	0.95±0.02		0.94±0.06	1.19±0.01	1.16±0.04	0.95±0.02		0.94±0.00	0.96±0.04	0.85±0.01	0.84±0.01		0.90±0.06	1.03±0.02	0.94±0.01	0.83±0.01		1.08±0.02	0.97±0.04	0.86±0.01	0.90±0.02		0.98±0.07	1.02±0.05	0.99±0.03	0.97±0.05		0.92±0.03	0.86±0.01	0.80±0.02	0.82±0.01		0.88±0.01	0.88±0.02	0.82±0.01	0.82±0.00		0.92±0.07	0.80±0.01	0.77±0.01	0.77±0.01		1.00±0.09	0.90±0.02
6-Methyl-5-hepten-2-one	free	Norisoprenoids	1.84±0.13	1.80±0.17	2.62±0.41	5.53±2.83		2.41±0.21	2.10±0.38	2.50±0.09	2.21±0.28		1.88±0.34	1.69±0.14	1.65±0.05	1.57±0.08		1.78±0.75	1.49±0.01	1.59±0.06	1.31±0.03		1.85±0.15	2.87±0.45	2.38±0.39	3.65±1.50		2.36±0.11	3.85±0.39	3.31±0.19	2.41±0.11		1.55±0.04	2.08±0.18	1.46±0.14	1.65±0.09		1.45±0.04	1.94±0.12	1.36±0.18	1.63±0.17		1.63±0.32	1.52±0.19	1.36±0.06	1.27±0.11		1.26±0.10	1.50±0.07
6-Methyl-5-hepten-2-ol	free	Norisoprenoids	0.28±0.02	0.31±0.03	0.58±0.17	0.77±0.64		0.33±0.06	0.37±0.02	ND	ND		0.29±0.04	0.25±0.02	0.30±0.04	0.26±0.03		0.26±0.02	0.26±0.01	ND	ND		0.26±0.03	0.12±0.21	0.45±0.04	0.33±0.03		0.57±0.08	ND	ND	ND		ND	ND	0.09±0.16	ND		0.36±0.03	0.30±0.03	0.31±0.01	ND		0.22±0.02	ND	ND	ND		ND	ND
trans-Theaspirane	free	Norisoprenoids	0.79±0.08	1.01±0.10	0.40±0.03	ND		1.71±0.29	2.35±0.43	1.71±0.08	0.98±0.05		0.74±0.01	1.25±0.09	0.30±0.02	0.19±0.02		0.59±0.17	1.14±0.15	0.67±0.03	0.21±0.01		0.94±0.07	2.06±0.61	0.70±0.04	0.51±0.06		2.35±0.03	2.47±0.22	2.24±0.23	1.89±0.14		1.05±0.00	1.79±0.11	0.29±0.06	0.29±0.01		0.69±0.00	1.01±0.05	0.48±0.01	0.23±0.01		0.20±0.03	0.19±0.02	0.16±0.01	0.16±0.00		0.22±0.03	0.28±0.02
cis-Theaspirane	free	Norisoprenoids	0.66±0.04	0.86±0.06	0.33±0.01	ND		1.54±0.29	2.03±0.34	1.41±0.34	0.96±0.03		0.60±0.01	1.01±0.13	0.26±0.02	0.17±0.02		0.47±0.12	0.90±0.12	0.58±0.04	0.18±0.00		0.67±0.05	1.49±0.40	0.50±0.02	0.39±0.04		1.87±0.07	1.98±0.11	1.84±0.18	1.59±0.09		0.75±0.03	1.32±0.08	0.24±0.03	0.25±0.02		0.62±0.02	0.89±0.05	0.40±0.01	0.22±0.00		ND	ND	ND	ND		ND	ND
Vitispirane B	free	Norisoprenoids	2.18±0.30	8.35±2.60	4.37±0.59	2.59±0.55		4.04±1.49	8.60±2.08	4.67±0.41	1.62±0.15		2.03±0.13	6.79±2.54	1.30±0.39	1.19±0.29		2.82±1.21	10.12±2.35	2.20±0.25	0.90±0.15		12.30±1.55	28.80±2.38	1.46±0.39	10.75±2.25		11.99±2.01	24.79±5.96	12.83±3.08	6.54±0.40		13.37±1.77	19.42±6.52	0.89±0.08	1.27±0.25		2.79±0.58	2.70±0.91	1.48±0.32	1.15±0.14		3.16±2.28	1.78±0.94	0.82±0.15	1.08±0.36		9.71±7.00	9.14±1.48
Vitispirane A	free	Norisoprenoids	1.33±0.01	5.11±1.38	3.57±0.56	2.38±0.49		2.55±0.75	5.64±1.14	4.40±0.23	2.21±0.22		1.10±0.05	3.64±0.65	1.37±0.44	1.30±0.25		1.41±0.39	4.54±0.80	2.09±0.13	1.01±0.18		2.89±0.25	22.03±8.16	2.05±0.64	9.49±1.82		6.36±0.97	21.89±6.08	13.66±2.28	9.59±0.71		4.41±0.47	12.15±1.92	1.16±0.08	1.69±0.34		2.13±0.11	2.97±0.96	1.93±0.43	1.56±0.22		1.10±0.43	1.16±0.45	0.70±0.08	0.85±0.17		2.25±1.08	2.75±0.31
α-Ionene	free	Norisoprenoids	ND	0.27±0.05	0.84±0.32	1.66±0.48		0.18±0.02	0.44±0.07	0.32±0.12	0.37±0.02		ND	0.23±0.03	0.55±0.20	0.69±0.19		ND	0.22±0.03	0.50±0.05	0.45±0.07		ND	11.59±7.38	20.21±6.45	30.45±3.85		0.30±0.16	67.13±8.49	27.72±11.76	18.55±6.85		0.20±0.01	3.50±0.52	10.60±2.58	11.64±2.76		0.34±0.12	6.39±0.78	9.27±3.93	18.90±1.48		1.14±0.33	3.71±1.21	3.57±1.90	4.80±1.98		0.62±0.08	12.72±4.31
Edulan I	free	Norisoprenoids	ND	ND	ND	ND		ND	ND	ND	ND		ND	ND	ND	ND		ND	ND	ND	ND		ND	ND	ND	ND		ND	ND	ND	ND		ND	ND	ND	ND		ND	ND	ND	ND		0.89±0.07	1.12±0.11	1.21±0.22	1.23±0.18		0.90±0.07	1.34±0.06
β-Cyclocitral	free	Norisoprenoids	1.69±0.12	4.30±0.08	4.12±0.37	2.41±0.20		2.56±0.26	4.60±0.26	3.63±0.36	2.18±0.17		1.19±0.12	2.24±0.21	1.34±0.07	1.19±0.07		1.47±0.38	2.94±0.07	2.10±0.01	1.09±0.04		1.86±0.30	3.73±0.80	1.79±0.05	2.23±0.23		3.48±0.64	5.37±0.41	3.34±0.39	2.66±0.35		1.28±0.02	1.97±0.08	1.13±0.19	1.28±0.09		1.97±0.09	2.33±0.13	1.38±0.09	1.03±0.02		1.01±0.17	1.12±0.15	0.77±0.07	0.75±0.08		1.63±0.36	2.36±0.18
Riesling acetal	free	Norisoprenoids	1.20±0.12	2.98±0.67	2.35±0.29	1.70±0.19		2.30±0.50	4.42±1.01	3.52±0.38	1.60±0.10		1.14±0.01	2.58±0.53	1.31±0.22	1.12±0.14		1.48±0.38	3.57±0.18	1.74±0.06	0.99±0.04		3.62±0.34	8.88±0.95	1.52±0.28	4.79±0.78		4.08±0.43	11.78±2.98	8.23±1.41	5.03±0.73		2.87±0.14	4.80±0.86	0.96±0.10	1.22±0.16		1.54±0.16	1.99±0.39	1.56±0.21	1.38±0.12		1.08±0.37	1.44±0.45	1.18±0.28	1.33±0.34		2.47±0.92	3.99±0.26
α-Cyclogeraniol	free	Norisoprenoids	ND	ND	ND	ND		ND	ND	ND	ND		ND	ND	ND	ND		ND	ND	ND	ND		1.16±0.35	1.32±0.41	ND	0.71±0.62		1.14±0.21	ND	ND	ND		0.78±0.02	0.69±0.01	ND	ND		0.75±0.05	0.74±0.05	ND	ND		ND	ND	ND	ND		ND	ND
1,1,6-Trimethyl-1,2- dihydronaphtha-lene	free	Norisoprenoids	0.69±0.01	1.69±0.12	2.76±0.38	2.70±0.20		1.26±0.42	3.90±0.88	2.07±0.11	1.53±0.09		0.67±0.02	1.26±0.03	1.17±0.27	1.14±0.23		0.74±0.06	1.63±0.11	1.49±0.18	1.22±0.08		1.20±0.14	15.87±9.08	7.12±1.57	13.59±0.80		1.59±0.55	37.93±4.35	28.56±1.86	18.86±7.71		1.61±0.14	6.12±0.30	3.80±0.63	4.32±0.79		1.22±0.24	5.04±0.91	5.21±1.02	8.63±0.43		1.85±0.60	7.37±2.32	9.03±4.01	11.38±2.57		3.64±1.53	26.91±4.04
(E)-1-(2,3,6-Trimethylphenyl)buta-1,3-diene	free	Norisoprenoids	ND	ND	ND	ND		ND	ND	ND	ND		ND	ND	ND	ND		ND	ND	ND	ND		ND	2.43±1.13	2.95±0.70	4.71±0.35		ND	7.89±0.94	4.14±1.33	3.09±0.76		ND	1.05±0.05	1.91±0.32	1.97±0.28		ND	1.38±0.07	1.68±0.52	2.70±0.19		0.74±0.06	1.17±0.20	1.11±0.28	1.29±0.25		0.67±0.03	2.90±0.77
(Z)-β-Damascenone	free	Norisoprenoids	1.28±0.03	7.22±1.17	10.66±0.84	10.82±1.21		1.85±0.30	8.29±1.29	6.38±0.61	6.49±0.23		1.23±0.04	4.57±0.63	5.04±0.77	5.00±0.64		1.06±0.10	3.73±0.42	5.20±0.43	4.80±0.61		1.06±0.15	11.05±1.91	7.87±1.90	11.15±1.70		1.90±0.76	12.15±1.64	13.65±2.03	13.48±0.67		1.67±0.01	6.07±0.47	5.01±0.32	5.17±0.57		1.24±0.21	6.12±0.48	6.27±0.52	9.97±0.37		4.25±1.43	7.79±1.02	6.01±2.70	7.57±2.37		3.34±0.90	9.54±0.99
(E)-β-Damascenone	free	Norisoprenoids	26.75±0.37	71.76±9.90	97.57±5.22	98.75±9.02		31.18±2.56	73.92±6.04	68.46±3.75	66.04±1.06		17.16±1.60	46.58±3.10	49.32±3.79	49.06±3.66		12.58±2.34	41.31±2.19	50.99±2.52	47.34±3.41		16.10±6.24	94.06±15.77	75.79±11.93	97.24±8.95		30.58±5.11	104.29±8.30	115.28±16.55	112.39±4.76		28.74±0.14	55.01±2.79	49.70±2.37	49.45±4.01		19.21±6.97	56.21±3.70	60.61±6.91	78.10±2.44		40.58±7.11	61.88±5.66	50.49±14.31	58.75±11.91		35.72±4.33	67.13±5.49
Geranylacetone	free	Norisoprenoids	1.04±0.18	1.09±0.01	1.73±0.12	1.78±0.19		1.76±0.33	1.38±0.17	1.38±0.09	0.96±0.05		1.04±0.15	1.25±0.26	1.14±0.09	1.12±0.06		0.89±0.17	0.93±0.09	1.03±0.07	0.82±0.05		1.06±0.11	2.68±0.71	2.10±0.32	2.25±0.30		1.75±0.22	2.38±0.42	2.69±0.96	1.64±0.21		0.71±0.04	0.81±0.09	0.89±0.10	0.91±0.04		0.71±0.04	1.01±0.08	0.90±0.07	1.34±0.21		0.88±0.13	1.09±0.21	1.18±0.18	1.07±0.03		0.91±0.10	1.48±0.21
(E)-β-Ionone	free	Norisoprenoids	1.21±0.12	5.46±0.67	5.99±0.34	2.52±0.24		1.62±0.06	5.74±1.05	4.02±0.62	2.14±0.27		0.58±0.05	2.17±0.53	1.41±0.07	1.07±0.08		0.65±0.24	2.54±0.33	1.86±0.07	0.59±0.07		1.12±0.26	3.76±0.66	2.08±0.15	2.56±0.43		2.29±0.89	4.48±0.25	2.64±0.30	1.78±0.17		0.51±0.02	1.21±0.10	0.85±0.35	0.85±0.09		0.89±0.08	1.78±0.05	0.83±0.12	0.32±0.02		0.48±0.15	0.94±0.23	0.32±0.09	0.32±0.10		1.26±0.37	2.07±0.21
(E)-2-Octen-1-ol	free	Alcohols	0.07±0.02	0.20±0.00	0.25±0.03	0.32±0.03		0.19±0.06	0.43±0.16	0.38±0.06	0.35±0.02		0.06±0.01	0.10±0.01	0.17±0.01	0.16±0.02		0.05±0.03	0.13±0.02	0.17±0.02	0.29±0.14		0.82±0.01	1.00±0.02	1.00±0.04	0.99±0.07		0.87±0.03	1.05±0.03	1.08±0.04	1.30±0.07		0.78±0.01	0.83±0.02	0.85±0.02	0.90±0.02		0.77±0.01	0.85±0.01	0.86±0.00	0.89±0.01		0.77±0.02	0.83±0.03	0.80±0.02	0.80±0.03		0.83±0.02	1.02±0.04
(E)-2-Penten-1-ol	free	Alcohols	5.01±0.30	10.89±1.87	13.49±0.26	6.91±0.95		4.16±0.99	11.34±0.76	9.57±0.46	6.80±0.43		5.88±0.08	6.66±0.40	5.07±1.14	3.71±0.54		3.31±0.90	7.57±0.44	7.68±0.79	3.33±0.38		ND	ND	ND	ND		ND	ND	ND	ND		ND	ND	ND	ND		ND	ND	ND	ND		43.53±16.86	42.86±4.49	28.46±6.78	36.60±7.23		39.52±11.03	81.86±4.46
1-Decanol	free	Alcohols	ND	1.53±0.00	1.54±0.00	1.53±0.00		1.53±0.00	1.54±0.01	1.53±0.00	ND		1.53±0.00	1.55±0.01	1.56±0.01	1.54±0.02		1.52±0.00	1.53±0.00	1.53±0.01	1.53±0.00		1.52±0.00	1.55±0.01	1.54±0.00	1.54±0.01		1.53±0.00	1.54±0.00	1.53±0.00	1.53±0.00		1.53±0.00	1.54±0.01	1.53±0.00	1.53±0.00		1.53±0.00	1.53±0.00	1.54±0.01	1.54±0.01		1.52±0.00	1.53±0.00	1.53±0.00	1.53±0.00		1.53±0.00	1.54±0.00
1-Dodecanol	free	Alcohols	4.63±0.00	4.66±0.01	4.65±0.01	4.65±0.01		4.66±0.03	4.83±0.05	4.65±0.01	4.68±0.06		4.68±0.03	4.77±0.01	4.87±0.05	4.75±0.11		4.62±0.01	4.67±0.02	4.67±0.05	4.64±0.01		4.60±0.01	5.01±0.17	4.77±0.02	4.85±0.09		4.64±0.01	4.71±0.01	4.71±0.03	4.70±0.02		4.73±0.05	4.78±0.08	4.65±0.01	4.63±0.01		4.64±0.05	4.65±0.02	4.77±0.04	4.72±0.04		4.59±0.00	4.62±0.01	4.61±0.01	4.60±0.00		4.63±0.03	4.64±0.01
1-Heptanol	free	Alcohols	0.70±0.01	0.96±0.05	1.20±0.04	0.99±0.06		0.83±0.09	0.92±0.08	1.00±0.06	0.97±0.04		0.71±0.03	0.76±0.01	0.82±0.02	0.74±0.02		0.75±0.07	0.79±0.01	0.78±0.03	0.79±0.05		0.93±0.14	1.28±0.27	0.92±0.07	1.09±0.23		1.29±0.15	1.03±0.05	0.96±0.06	1.14±0.07		0.77±0.03	0.79±0.02	0.83±0.05	0.72±0.01		0.83±0.02	0.89±0.04	0.84±0.03	0.87±0.02		0.67±0.04	0.74±0.04	0.71±0.01	0.68±0.04		0.73±0.03	0.84±0.02
1-Hexanol, 2-ethyl-	free	Alcohols	1.08±0.07	1.04±0.09	1.53±0.07	1.17±0.12		0.81±0.19	1.64±0.40	1.31±0.16	0.86±0.07		0.43±0.03	0.60±0.10	0.72±0.13	0.63±0.15		0.54±0.16	0.69±0.07	0.70±0.02	0.88±0.34		1.48±0.04	1.35±0.20	1.33±0.24	1.41±0.28		0.95±0.15	1.27±0.16	1.22±0.11	1.30±0.18		0.53±0.04	0.69±0.06	0.64±0.07	0.67±0.04		0.49±0.08	0.72±0.06	0.61±0.17	0.70±0.04		0.73±0.16	0.50±0.08	0.51±0.15	0.47±0.10		0.45±0.09	0.83±0.04
1-Octanol	free	Alcohols	0.96±0.00	1.43±0.06	1.71±0.07	1.73±0.10		1.29±0.10	1.65±0.14	1.92±0.16	1.47±0.01		1.04±0.02	1.15±0.03	1.28±0.04	1.21±0.06		1.06±0.08	1.16±0.04	1.20±0.04	1.19±0.10		1.17±0.06	1.93±0.23	1.67±0.08	1.75±0.26		1.68±0.07	1.84±0.06	1.64±0.04	1.81±0.11		1.08±0.01	1.19±0.04	1.20±0.06	1.16±0.01		1.06±0.03	1.18±0.02	1.18±0.09	1.23±0.02		0.97±0.07	1.15±0.08	1.04±0.10	1.03±0.06		1.10±0.07	1.44±0.02
1-Octen-3-ol	free	Alcohols	0.86±0.17	1.64±0.48	2.16±0.45	4.42±0.30		3.54±2.69	1.92±0.33	2.09±0.26	2.00±0.22		0.71±0.07	0.77±0.09	1.05±0.15	1.14±0.11		0.76±0.23	1.76±0.15	1.61±0.53	4.98±1.16		1.55±0.27	2.52±0.44	1.86±0.53	2.16±0.17		3.50±1.02	2.14±0.49	2.70±0.46	2.69±0.50		0.75±0.08	0.81±0.04	0.98±0.14	1.87±0.45		0.96±0.17	1.20±0.09	1.52±0.23	3.94±0.70		0.67±0.17	0.74±0.09	0.52±0.07	0.53±0.12		0.86±0.21	1.22±0.08
1-Pentanol	free	Alcohols	ND	ND	ND	ND		ND	ND	ND	ND		ND	ND	ND	ND		ND	ND	ND	ND		ND	ND	ND	ND		ND	ND	ND	ND		0.60±0.04	0.50±0.02	0.47±0.04	0.49±0.06		0.49±0.02	0.42±0.02	0.61±0.01	0.65±0.14		ND	ND	ND	ND		ND	ND
3-Methyl-2-buten-1-ol	free	Alcohols	ND	ND	ND	ND		ND	ND	ND	ND		ND	ND	ND	ND		ND	ND	ND	ND		ND	ND	ND	ND		ND	ND	ND	ND		ND	ND	ND	ND		ND	ND	ND	ND		ND	ND	ND	ND		ND	ND
2-Heptanol	free	Alcohols	0.26±0.03	0.43±0.11	0.35±0.01	0.31±0.17		0.61±0.48	0.35±0.02	0.33±0.03	0.31±0.08		0.37±0.10	0.18±0.07	0.09±0.04	ND		0.47±0.16	0.29±0.02	0.16±0.03	0.11±0.01		0.43±0.23	0.37±0.17	0.18±0.05	0.26±0.13		0.82±0.25	0.26±0.05	0.24±0.03	0.34±0.08		0.13±0.04	0.09±0.01	0.09±0.03	ND		0.31±0.03	0.22±0.07	0.16±0.03	ND		ND	ND	ND	ND		ND	ND
2-Octanol	free	Alcohols	ND	ND	ND	ND		ND	ND	ND	ND		ND	ND	ND	ND		ND	ND	ND	ND		ND	ND	ND	ND		ND	ND	ND	ND		ND	ND	ND	ND		ND	ND	ND	ND		ND	ND	ND	ND		ND	ND
3-Methyl-3-buten-1-ol	free	Alcohols	ND	ND	ND	ND		ND	ND	ND	ND		ND	ND	ND	ND		ND	ND	ND	ND		ND	ND	ND	ND		ND	ND	ND	ND		ND	ND	ND	ND		ND	ND	ND	ND		14.22±4.05	ND	16.50±1.23	13.07±2.83		19.04±1.59	25.18±2.23
3-Ethyl-4-methylpentanol	free	Alcohols	0.48±0.04	7.07±3.87	8.29±1.77	0.63±0.10		1.89±1.08	3.95±0.89	2.53±0.33	3.21±1.03		0.48±0.06	1.13±0.25	0.97±0.02	0.19±0.07		0.81±0.29	1.76±0.27	1.69±0.28	0.67±0.12		0.28±0.11	3.72±2.26	1.20±1.24	2.86±1.52		1.48±0.44	1.85±0.82	1.43±0.21	1.34±0.10		0.26±0.05	0.91±0.10	0.51±0.22	ND		1.44±0.32	3.98±2.36	2.45±0.33	0.43±0.11		ND	ND	ND	ND		ND	ND
3-Octanol	free	Alcohols	ND	0.04±0.02	0.09±0.01	ND		0.05±0.03	0.06±0.00	0.06±0.00	0.06±0.01		ND	ND	ND	ND		0.03±0.01	ND	ND	ND		0.02±0.00	ND	ND	0.40±0.67		0.05±0.00	ND	ND	0.07±0.01		ND	ND	ND	ND		ND	ND	ND	ND		ND	ND	ND	ND		ND	ND
Benzyl alcohol	free	Alcohols	12.70±2.49	32.52±11.37	33.41±6.83	13.19±2.21		74.00±40.69	82.51±33.72	31.09±5.14	47.14±9.81		35.23±17.77	14.24±2.50	17.22±9.40	9.84±1.88		27.04±10.23	23.84±8.85	19.12±9.20	17.40±1.03		22.79±7.01	30.62±6.84	12.12±3.66	19.88±6.58		76.47±17.56	31.94±13.30	22.72±0.62	29.22±4.32		17.91±7.74	7.86±0.59	7.65±3.10	6.51±0.29		19.56±1.54	23.17±7.51	20.08±1.60	9.05±1.91		6.55±1.73	11.91±3.09	ND	ND		8.21±1.92	9.90±1.46
α-Phenylethanol	free	Alcohols	10.04±1.00	14.23±1.68	12.95±1.13	ND		9.80±0.69	11.70±0.60	10.60±0.53	10.16±0.14		9.91±0.18	10.52±0.35	ND	ND		8.78±0.39	9.87±0.66	ND	ND		12.83±0.20	24.97±7.69	ND	15.66±1.79		14.91±0.97	15.55±0.11	14.19±1.01	16.29±1.69		11.97±0.31	15.73±0.63	ND	ND		9.69±0.55	10.44±0.95	ND	ND		11.92±2.57	ND	ND	ND		14.73±2.79	15.96±1.68
β-Phenylethyl alcohol	free	Alcohols	28.25±0.19	51.64±7.64	50.65±5.56	31.88±3.70		57.01±17.39	72.96±8.78	50.54±1.20	89.31±38.47		27.68±0.38	33.41±2.32	29.59±2.75	26.73±1.64		37.55±6.89	54.61±5.38	42.16±9.74	30.18±1.89		40.39±3.97	62.15±11.17	32.93±2.92	49.12±2.35		75.06±4.04	134.11±17.47	93.28±9.96	77.55±5.24		36.85±0.90	43.09±2.54	27.87±1.62	35.73±3.62		38.53±2.99	52.19±1.85	40.61±2.01	42.89±3.35		25.72±1.84	27.06±2.38	23.60±0.54	23.38±0.48		30.26±3.11	41.84±1.45
Methyl Isobutyl Ketone	free	Carbonyl compounds	49.40±3.00	45.73±0.99	43.95±0.74	43.35±1.24		45.84±0.69	40.00±1.38	34.23±3.99	39.73±6.55		49.40±0.68	44.46±0.21	44.26±0.18	44.27±0.26		49.05±0.88	44.12±0.27	43.13±0.67	42.26±0.47		54.67±0.21	44.04±1.22	47.47±0.26	41.57±0.82		48.56±1.11	42.01±1.89	47.73±1.12	40.25±2.14		45.30±2.76	34.59±0.59	43.00±0.72	43.06±0.40		46.74±0.88	43.37±0.67	44.68±1.65	44.42±3.51		54.92±3.19	45.98±0.57	48.31±1.59	49.38±1.45		50.94±0.49	48.51±0.80
Pentanal	free	Carbonyl compounds	28.47±0.67	47.26±3.20	39.83±4.25	33.42±1.05		33.43±2.77	54.77±1.55	58.25±12.21	39.25±0.20		29.66±0.46	46.45±2.07	33.24±0.80	33.56±1.63		28.75±0.79	50.53±1.53	39.72±0.85	33.65±0.80		31.47±2.17	41.86±3.26	29.01±0.18	31.18±1.95		34.53±0.84	32.83±0.67	43.28±2.85	43.41±1.55		34.98±1.90	39.55±0.63	28.76±0.86	29.18±0.53		36.39±2.51	35.91±1.54	32.55±0.97	30.94±1.32		33.44±1.15	27.81±1.21	26.44±0.50	26.93±0.54		31.19±1.45	35.90±2.99
Heptanal	free	Carbonyl compounds	0.80±0.13	5.26±1.13	10.19±1.37	11.81±1.15		1.60±0.53	6.58±1.35	8.72±0.43	8.84±0.65		ND	3.72±1.40	6.66±0.50	5.82±0.30		0.61±0.14	3.19±0.56	6.68±0.31	6.36±0.58		0.12±0.00	7.63±1.34	11.52±1.56	7.09±1.92		1.55±0.83	8.25±0.73	9.01±1.31	9.96±1.25		0.93±0.08	4.42±0.51	6.11±0.94	5.03±0.20		0.84±0.20	5.44±0.46	4.40±1.18	6.64±0.52		0.97±0.30	3.99±0.16	2.80±0.74	3.18±0.64		2.40±0.33	5.47±0.21
Octanal	free	Carbonyl compounds	2.29±0.02	2.75±0.02	3.13±0.16	3.19±0.21		2.47±0.08	2.99±0.01	3.39±0.32	2.88±0.10		2.30±0.00	2.59±0.10	2.84±0.03	3.14±0.07		2.29±0.02	2.57±0.07	2.96±0.16	2.69±0.12		2.26±0.01	3.58±0.13	3.19±0.14	3.41±0.32		2.48±0.16	3.04±0.10	3.14±0.02	3.14±0.12		2.35±0.03	2.84±0.13	2.73±0.07	2.96±0.03		2.31±0.03	2.63±0.05	2.59±0.09	2.81±0.01		2.29±0.05	2.82±0.17	2.39±0.06	2.43±0.05		2.52±0.04	2.78±0.07
Decanal	free	Carbonyl compounds	2.41±0.02	2.65±0.01	2.88±0.09	2.94±0.14		2.59±0.11	3.36±0.22	2.92±0.11	2.96±0.13		2.39±0.04	2.59±0.08	2.99±0.09	2.90±0.13		2.37±0.01	2.52±0.04	2.65±0.05	2.63±0.09		ND	3.07±0.23	3.87±0.18	3.01±0.33		ND	3.08±0.15	3.04±0.15	2.99±0.25		2.37±0.02	2.58±0.13	2.68±0.11	2.70±0.02		2.37±0.01	2.61±0.05	2.85±0.20	3.13±0.25		2.40±0.01	3.09±0.23	2.70±0.16	2.71±0.13		2.81±0.07	3.63±0.09
Furfural	free	Carbonyl compounds	0.64±0.04	11.58±18.17	47.55±39.55	1.25±0.84		2.83±2.73	1.46±0.10	1.70±0.48	1.16±0.21		0.33±0.03	0.43±0.06	0.35±0.06	0.39±0.05		0.37±0.15	0.68±0.04	0.48±0.03	0.32±0.04		ND	0.93±0.16	0.87±0.31	0.74±0.18		3.35±1.76	2.48±0.08	29.20±43.71	17.18±22.33		1.66±0.35	6.59±4.52	11.66±18.14	0.37±0.06		1.22±0.29	0.75±0.11	0.50±0.06	17.15±4.30		ND	ND	ND	ND		ND	ND
5-MethyIfurfural	free	Carbonyl compounds	ND	ND	ND	ND		ND	ND	ND	ND		0.07±0.01	ND	ND	ND		ND	ND	ND	ND		0.20±0.02	ND	ND	ND		ND	ND	6.03±9.73	2.21±2.69		0.11±0.02	0.77±0.55	1.81±2.78	ND		ND	ND	0.12±0.05	2.16±0.60		ND	ND	ND	ND		ND	ND
(E,E)-2,4-Heptadienal	free	Carbonyl compounds	2.25±0.03	2.90±0.25	3.59±0.19	3.24±0.20		2.58±0.33	4.39±0.25	4.07±0.32	3.16±0.12		1.99±0.01	2.33±0.11	2.38±0.03	2.51±0.05		1.96±0.03	2.30±0.04	2.79±0.07	2.11±0.02		2.23±0.12	2.82±0.28	2.71±0.08	2.90±0.34		2.41±0.29	3.86±0.07	3.70±0.09	3.72±0.29		2.04±0.02	2.57±0.05	2.36±0.09	2.41±0.08		2.00±0.03	2.35±0.08	2.34±0.08	2.19±0.05		2.05±0.07	2.03±0.05	2.07±0.05	2.04±0.09		2.23±0.10	2.80±0.11
(E,Z)-2,4-Heptadienal	free	Carbonyl compounds	ND	ND	ND	ND		ND	ND	ND	ND		ND	ND	ND	ND		ND	ND	ND	ND		1.99±0.03	2.04±0.03	2.32±0.14	2.03±0.05		2.13±0.05	2.25±0.06	2.30±0.02	2.22±0.04		2.01±0.04	2.01±0.00	2.06±0.04	2.04±0.01		1.95±0.01	2.03±0.01	2.05±0.04	1.96±0.01		1.89±0.02	1.93±0.02	1.95±0.03	1.91±0.01		1.91±0.01	1.97±0.01
1-Octen-3-one	free	Carbonyl compounds	2.26±0.01	2.43±0.08	2.89±0.17	2.89±0.26		2.39±0.04	2.60±0.09	2.77±0.11	2.67±0.03		2.27±0.02	2.32±0.05	2.76±0.13	2.69±0.07		2.30±0.06	2.41±0.03	2.66±0.06	2.50±0.10		2.30±0.02	3.03±0.23	2.65±0.08	2.99±0.00		2.41±0.04	2.88±0.13	2.75±0.04	3.20±0.26		2.30±0.01	2.48±0.08	2.49±0.04	2.57±0.05		2.31±0.01	2.42±0.01	2.44±0.04	2.48±0.03		2.27±0.06	2.66±0.31	2.26±0.02	2.32±0.08		2.64±0.07	2.69±0.09
(E)-2-Decenal	free	Carbonyl compounds	ND	ND	ND	ND		ND	ND	ND	ND		ND	ND	ND	ND		ND	ND	ND	ND		ND	ND	1.92±0.00	ND		ND	ND	ND	ND		1.88±0.00	1.88±0.00	1.88±0.00	1.88±0.00		ND	ND	ND	ND		1.87±0.00	1.90±0.01	ND	ND		1.88±0.01	1.89±0.00
2-Heptanone, 4,6-dimethyl-	free	Carbonyl compounds	2.41±0.06	2.63±0.06	2.64±0.01	2.58±0.03		2.51±0.03	2.60±0.05	2.55±0.03	2.58±0.11		2.44±0.04	2.50±0.03	2.51±0.02	2.48±0.01		2.41±0.03	2.52±0.05	2.48±0.01	2.43±0.02		2.57±0.06	2.61±0.03	2.73±0.06	2.48±0.01		2.56±0.09	2.88±0.43	2.76±0.02	2.63±0.07		2.42±0.08	2.44±0.02	2.44±0.00	2.45±0.01		2.44±0.03	2.52±0.01	2.59±0.04	2.58±0.05		2.27±0.03	2.47±0.00	2.36±0.01	2.36±0.01		2.38±0.04	2.45±0.02
(E)-2-Heptenal	free	Carbonyl compounds	2.81±0.02	2.94±0.14	3.28±0.09	2.96±0.13		2.72±0.17	3.33±0.19	3.38±0.16	2.87±0.06		2.46±0.04	2.57±0.10	2.54±0.03	2.56±0.09		2.38±0.04	2.52±0.04	2.67±0.04	2.40±0.01		3.55±0.14	3.57±0.14	2.85±0.13	3.13±0.09		2.86±0.10	3.18±0.13	3.03±0.07	3.81±0.31		2.77±0.14	2.79±0.14	2.53±0.08	2.54±0.04		2.34±0.01	2.51±0.03	2.53±0.08	2.47±0.04		2.54±0.20	2.77±0.30	2.39±0.06	2.41±0.08		3.02±0.20	3.23±0.10
(E)-2-Octenal	free	Carbonyl compounds	2.00±0.03	2.10±0.02	2.21±0.05	2.16±0.04		2.07±0.06	2.27±0.04	2.28±0.09	2.06±0.02		1.95±0.01	2.02±0.04	2.03±0.03	2.03±0.02		1.94±0.02	2.01±0.02	2.04±0.01	1.95±0.02		2.14±0.03	2.27±0.06	2.16±0.06	2.21±0.04		2.11±0.06	2.22±0.06	2.20±0.04	2.37±0.09		2.04±0.03	2.11±0.05	2.02±0.03	2.05±0.00		1.92±0.01	1.96±0.01	1.96±0.02	1.98±0.02		1.98±0.05	2.05±0.06	1.97±0.03	1.99±0.05		2.16±0.08	2.28±0.05
(E)-2-Pentenal	free	Carbonyl compounds	ND	ND	ND	ND		ND	ND	ND	ND		ND	ND	ND	ND		ND	ND	ND	ND		26.89±1.03	36.45±5.01	34.64±1.85	31.76±3.19		ND	36.10±2.91	36.18±3.84	33.62±0.86		32.49±0.35	32.34±0.29	30.47±1.10	29.11±0.45		29.01±0.15	32.14±0.97	35.14±0.16	30.16±0.85		28.25±1.09	27.31±0.25	26.27±0.26	27.20±0.23		33.24±3.05	31.11±0.79
3-Octanone	free	Carbonyl compounds	2.27±0.00	2.46±0.06	2.50±0.08	2.57±0.03		2.38±0.02	2.47±0.04	2.53±0.07	2.49±0.04		ND	2.31±0.05	2.32±0.09	2.29±0.01		2.25±0.02	2.32±0.02	2.35±0.02	2.40±0.06		2.24±0.02	2.30±0.05	2.53±0.16	2.41±0.01		2.30±0.01	2.49±0.05	2.58±0.07	2.75±0.07		2.23±0.01	2.30±0.01	2.33±0.04	2.28±0.02		2.24±0.01	2.34±0.03	2.34±0.01	2.39±0.05		2.24±0.03	2.38±0.03	2.29±0.02	2.27±0.05		2.33±0.02	2.32±0.04
2,6-Dimethyl-4-heptanone	free	Carbonyl compounds	16.44±0.78	33.77±3.01	30.62±2.32	26.11±1.15		15.61±2.23	19.54±1.97	14.82±0.71	25.58±13.38		20.75±1.02	27.93±2.97	24.60±0.67	22.11±0.59		18.96±1.76	26.48±1.73	24.22±1.26	19.03±1.03		13.35±0.98	25.19±1.20	41.77±4.69	19.33±2.88		25.60±6.12	25.52±3.42	40.30±2.01	23.78±5.22		16.64±2.08	15.31±1.25	20.36±1.46	18.80±0.26		20.10±2.90	23.82±0.47	26.00±10.28	27.82±3.90		10.59±0.59	24.32±1.66	14.60±0.76	15.98±0.26		15.18±1.39	19.12±0.94
Acetophenone	free	Carbonyl compounds	4.01±0.07	4.24±0.08	4.48±0.14	4.24±0.04		4.10±0.17	4.76±0.19	4.38±0.09	4.24±0.07		3.86±0.01	3.99±0.10	4.08±0.08	3.99±0.05		3.86±0.04	4.00±0.04	4.04±0.02	3.97±0.04		4.02±0.04	4.62±0.07	4.53±0.18	4.44±0.14		4.13±0.13	4.62±0.17	4.61±0.32	4.50±0.15		3.83±0.01	3.89±0.01	4.22±0.37	3.96±0.04		3.83±0.03	3.94±0.02	3.92±0.02	3.97±0.03		3.84±0.03	3.87±0.02	3.87±0.04	3.85±0.02		3.97±0.07	4.10±0.03
Benzaldehyde	free	Carbonyl compounds	8.64±0.14	10.87±0.92	18.28±3.78	9.64±0.87		23.46±3.58	37.80±6.31	22.85±9.00	23.69±1.08		8.30±0.38	6.92±0.39	6.79±0.58	6.17±0.43		7.47±1.48	13.78±0.44	10.61±1.24	9.86±1.44		14.58±1.23	26.04±0.29	7.66±0.84	21.60±2.97		19.56±1.17	51.33±24.50	29.09±13.90	34.32±8.57		10.74±4.28	13.22±2.87	7.45±1.24	6.10±0.15		7.15±0.20	9.08±0.68	6.71±0.88	11.41±2.79		5.16±0.16	12.66±3.45	6.88±0.94	6.16±1.10		20.16±11.56	23.20±4.32
Benzaldehyde, 3,4-dimethyl-	free	Carbonyl compounds	3.79±0.01	5.41±2.40	4.29±0.14	5.33±0.29		3.88±0.03	4.27±0.12	4.28±0.02	4.03±0.12		3.92±0.09	4.07±0.14	4.20±0.17	4.47±0.43		3.83±0.02	3.92±0.08	3.93±0.02	3.87±0.01		3.85±0.02	4.15±0.04	4.13±0.14	4.14±0.11		4.01±0.12	4.27±0.11	6.19±1.50	4.33±0.09		4.08±0.19	4.14±0.39	4.00±0.04	3.96±0.06		3.98±0.22	4.20±0.13	3.84±0.02	4.07±0.12		3.94±0.06	3.84±0.03	3.86±0.05	3.82±0.01		3.95±0.06	4.29±0.37
Benzaldehyde, 4-methyl-	free	Carbonyl compounds	4.77±0.15	6.04±1.81	8.14±2.02	5.18±1.01		4.42±0.14	12.60±1.86	7.96±0.15	6.78±0.27		4.50±0.14	5.00±0.30	5.11±0.14	4.96±0.07		4.08±0.04	4.39±0.47	3.86±0.02	3.86±0.11		5.13±0.11	13.26±0.86	9.84±0.44	11.07±0.67		5.00±0.22	7.03±0.19	1.71±2.96	6.01±0.03		5.15±0.20	6.01±0.33	6.27±0.15	6.76±0.89		3.99±0.19	4.09±0.29	5.39±0.66	5.67±0.16		3.77±0.02	4.41±0.30	3.81±0.04	3.81±0.06		5.08±0.42	5.89±0.41
Benzeneacetaldehyde	free	Carbonyl compounds	3.10±0.10	10.61±2.37	12.41±2.10	14.59±1.53		9.77±2.95	22.43±1.66	24.86±2.36	60.62±6.67		2.83±0.19	4.88±0.39	8.86±0.37	11.93±2.36		3.35±0.21	12.15±1.16	21.33±3.04	18.02±1.11		3.09±0.17	27.88±8.25	43.82±8.79	22.80±1.93		28.82±24.06	134.16±39.46	111.69±16.27	224.05±51.83		3.40±0.23	10.95±0.94	26.80±3.23	25.77±2.52		13.04±4.96	57.31±7.17	29.25±4.60	79.28±12.12		2.86±0.01	8.39±1.36	7.43±3.00	7.27±1.21		4.49±0.75	24.03±4.52
Ethyl acetate	free	Esters	538.55±84.55	236.08±36.05	254.33±57.12	235.12±13.07		169.73±38.90	107.14±14.16	172.00±50.56	168.17±16.04		75.26±9.32	66.22±5.77	75.55±3.19	131.77±63.39		134.14±47.33	43.82±13.75	69.11±8.00	59.60±5.27		337.60±64.13	206.22±38.97	90.21±12.69	180.28±5.65		570.93±44.14	674.88±113.28	279.75±50.05	519.96±11.58		358.71±149.51	217.44±62.07	320.16±242.70	691.78±96.18		271.74±38.81	240.66±68.80	172.14±47.82	235.57±92.62		357.56±44.87	64.73±29.93	48.15±8.59	29.53±7.27		23.13±2.87	28.72±0.97
Butyl acetate	free	Esters	3.03±0.03	1.92±0.09	1.79±0.23	1.30±0.27		1.39±0.26	3.20±0.63	1.47±0.15	1.33±0.29		0.84±0.04	0.70±0.08	0.89±0.11	0.55±0.05		1.70±0.68	1.00±0.11	1.38±0.09	0.73±0.06		2.54±0.66	3.24±0.42	ND	2.75±0.34		ND	ND	ND	ND		ND	ND	ND	ND		ND	ND	ND	ND		ND	ND	ND	ND		ND	ND
Ethyl butanoate	free	Esters	0.80±0.01	0.87±0.01	0.87±0.01	0.89±0.04		0.84±0.02	0.91±0.08	0.88±0.02	ND		0.79±0.00	0.83±0.01	0.86±0.01	0.83±0.02		0.81±0.02	0.83±0.02	0.85±0.01	0.86±0.06		ND	ND	ND	ND		ND	ND	ND	ND		ND	ND	ND	ND		ND	ND	ND	ND		0.78±0.01	0.79±0.01	0.79±0.01	0.79±0.00		0.79±0.01	0.81±0.01
Isopentyl acetate	free	Esters	0.19±0.01	ND	ND	ND		0.57±0.28	1.23±0.40	ND	ND		2.02±0.41	0.34±0.09	ND	ND		0.40±0.18	0.25±0.03	0.15±0.01	ND		ND	ND	ND	ND		ND	ND	ND	ND		ND	ND	ND	ND		ND	ND	ND	ND		ND	ND	ND	ND		ND	ND
Methyl hexadecanoate	free	Esters	1.37±0.04	1.51±0.11	1.45±0.09	1.58±0.07		1.39±0.00	1.70±0.14	1.63±0.01	1.75±0.11		2.28±0.65	2.49±0.31	3.44±0.85	2.94±1.79		1.44±0.07	1.68±0.14	1.62±0.07	1.46±0.05		1.35±0.00	2.67±0.38	1.70±0.12	2.19±0.38		ND	ND	1.88±0.46	1.85±0.15		3.05±1.37	2.27±0.71	2.02±0.29	1.87±0.34		1.61±0.30	1.81±0.35	2.48±0.46	1.95±0.32		ND	1.60±0.07	ND	ND		1.57±0.33	1.50±0.11
Methyl salicylate	free	Esters	ND	ND	ND	ND		ND	ND	ND	ND		ND	ND	ND	ND		ND	ND	ND	ND		ND	ND	ND	ND		ND	ND	ND	ND		ND	ND	ND	ND		ND	ND	ND	ND		1.73±0.09	1.69±0.01	1.65±0.02	1.63±0.01		1.71±0.06	2.13±0.15
Toluene	free	Others	3.16±0.41	3.79±0.22	4.45±0.39	3.67±0.11		3.21±0.16	4.01±0.58	3.67±0.20	3.59±0.16		2.76±0.02	2.93±0.05	2.96±0.08	2.81±0.00		2.72±0.09	2.96±0.04	3.17±0.11	2.89±0.17		3.24±0.23	4.40±0.42	4.58±0.37	3.60±0.38		3.47±0.37	3.73±0.26	4.08±0.77	3.94±0.23		3.02±0.26	3.33±0.10	2.96±0.23	2.81±0.03		3.41±0.13	3.01±0.03	2.75±0.05	3.14±0.15		3.18±0.15	2.96±0.03	4.24±0.90	3.23±0.19		3.24±0.20	3.51±0.09
Indane	free	Others	1.10±0.00	1.12±0.01	1.15±0.01	1.12±0.01		1.10±0.00	1.12±0.01	1.12±0.00	1.11±0.00		1.10±0.00	1.11±0.01	1.10±0.00	1.10±0.00		1.10±0.00	1.10±0.00	1.11±0.01	1.10±0.00		1.10±0.00	1.12±0.00	1.12±0.00	ND		ND	1.12±0.00	1.13±0.01	1.13±0.01		ND	1.11±0.00	1.10±0.01	1.10±0.00		1.10±0.00	1.10±0.00	1.10±0.00	1.11±0.00		ND	ND	ND	ND		ND	ND
Styrene	free	Others	2.82±0.32	60.20±28.51	13.35±1.58	5.37±0.33		3.45±1.24	35.18±16.07	33.54±1.21	6.89±0.67		2.00±0.25	2.91±0.70	4.29±0.75	4.38±0.71		2.20±0.57	3.13±0.18	4.79±1.24	2.76±0.25		2.49±0.15	25.60±11.44	4.34±0.97	8.51±1.81		2.45±0.36	28.85±14.75	56.74±8.27	10.39±1.50		1.38±0.07	1.99±0.26	1.84±0.16	2.49±0.15		1.65±0.17	2.45±0.06	1.81±0.36	2.23±0.37		2.31±0.46	2.44±0.22	2.28±0.57	1.96±0.24		4.19±1.76	17.19±1.68
p-Cymene	free	Others	3.11±0.27	3.10±0.39	2.18±0.30	1.73±0.12		5.01±0.41	5.76±0.60	3.53±0.35	2.52±0.23		3.26±0.18	3.04±0.23	1.41±0.03	1.36±0.06		2.27±0.50	3.88±0.42	1.86±0.06	1.48±0.13		7.73±0.56	5.63±1.82	2.36±0.22	4.04±0.40		15.13±4.19	14.99±3.78	9.76±0.51	5.12±0.47		6.10±1.34	7.61±1.02	1.74±0.02	1.70±0.15		8.38±0.82	5.69±1.38	2.84±0.25	2.76±0.15		1.19±0.06	1.21±0.06	1.12±0.01	1.12±0.01		1.24±0.06	1.24±0.06
Phenol	free	Others	6.65±0.77	23.98±3.48	35.44±1.18	25.42±4.50		15.23±3.64	27.19±5.33	28.23±2.43	22.42±0.86		5.41±0.23	9.37±1.50	10.31±0.91	9.95±1.82		5.58±1.86	10.45±2.58	9.45±1.63	6.87±1.01		7.92±1.74	22.15±2.16	20.62±2.57	14.69±1.43		18.33±2.14	23.50±3.72	31.88±13.46	24.97±2.77		7.16±0.69	10.47±0.36	13.45±3.98	8.91±1.65		5.55±0.58	12.95±1.20	16.00±5.21	12.80±1.65		5.27±2.79	5.86±0.80	6.33±1.72	6.12±0.98		5.73±1.52	10.39±1.74
2-Methoxy-4-vinylphenol	free	Others	ND	ND	ND	ND		ND	ND	ND	ND		ND	ND	ND	ND		ND	ND	ND	ND		ND	ND	ND	ND		ND	ND	ND	ND		ND	ND	ND	ND		ND	ND	ND	ND		ND	ND	ND	ND		ND	ND
Thymol	free	Others	ND	ND	ND	ND		ND	ND	ND	ND		ND	ND	ND	ND		ND	ND	ND	ND		ND	ND	ND	ND		ND	ND	ND	ND		ND	ND	ND	ND		ND	ND	ND	ND		ND	ND	ND	ND		ND	ND
Naphthalene	free	Others	0.38±0.01	0.47±0.01	0.52±0.03	0.52±0.01		0.39±0.01	0.52±0.01	0.48±0.01	0.44±0.01		0.35±0.00	0.38±0.01	0.38±0.01	0.38±0.01		0.35±0.00	0.38±0.00	0.38±0.00	0.37±0.00		0.36±0.01	0.51±0.03	0.51±0.03	0.49±0.03		0.39±0.02	0.67±0.06	0.56±0.04	0.52±0.04		0.35±0.00	0.39±0.00	0.39±0.00	0.40±0.01		0.35±0.00	0.41±0.01	0.38±0.01	0.42±0.00		0.35±0.01	0.40±0.01	0.40±0.02	0.40±0.02		0.40±0.02	0.52±0.03
2-Ethylfuran	free	Others	12.08±0.27	6.66±0.46	6.85±0.24	6.19±0.23		7.27±0.69	9.45±0.47	8.43±0.93	6.98±0.76		12.96±0.38	6.67±0.41	5.01±0.26	4.82±0.24		8.78±2.12	8.05±0.23	6.55±0.27	4.33±0.21		10.15±1.77	6.85±0.30	6.09±0.48	6.04±1.86		7.87±0.54	7.81±0.42	6.95±0.27	7.97±0.43		12.40±1.31	6.74±0.40	4.81±0.48	4.71±0.33		5.41±0.33	5.74±0.58	7.50±0.22	5.71±0.30		8.53±2.11	3.59±0.15	3.56±0.26	3.86±0.21		7.09±1.17	5.86±0.14
2(5H)-Furanone, 5-ethyl-	free	Others	1.95±0.72	2.13±0.21	2.49±0.15	2.78±0.29		2.06±0.37	2.86±0.08	2.95±0.22	2.45±0.27		1.69±0.26	2.01±0.26	2.02±0.25	1.63±0.08		1.21±0.17	1.98±0.16	2.06±0.09	1.18±0.08		0.31±0.07	1.50±0.31	2.40±0.52	1.35±0.32		1.52±0.60	2.29±0.16	2.13±0.34	2.33±0.42		1.53±0.44	1.51±0.18	1.47±0.09	1.33±0.11		1.26±0.14	1.92±0.06	2.72±1.06	1.77±0.12		1.87±0.49	0.98±0.08	0.91±0.16	0.89±0.11		4.23±1.58	1.36±0.20
2-Pentylfuran	free	Others	2.42±0.04	3.00±0.07	3.62±0.21	4.42±0.54		2.54±0.10	3.62±0.15	3.77±0.24	3.25±0.12		2.40±0.02	2.72±0.12	3.27±0.08	3.45±0.13		2.33±0.05	2.71±0.06	3.38±0.17	2.91±0.16		2.44±0.01	3.61±0.50	4.08±0.34	4.08±0.23		2.78±0.20	4.07±0.32	3.45±0.04	5.72±0.93		2.58±0.09	3.24±0.19	3.26±0.15	4.66±0.45		2.31±0.03	2.78±0.07	3.10±0.08	3.49±0.06		2.36±0.12	2.56±0.08	2.52±0.15	2.67±0.21		3.36±0.49	5.59±0.14
3-Furanmethanol	free	Others	ND	ND	ND	ND		ND	ND	ND	ND		ND	ND	ND	ND		ND	ND	ND	ND		0.11±0.02	ND	ND	ND		ND	ND	ND	ND		0.09±0.01	0.13±0.04	0.26±0.44	ND		ND	ND	ND	0.56±0.18		ND	ND	ND	ND		ND	ND
Butyrolactone	free	Others	ND	ND	ND	ND		ND	ND	ND	ND		ND	ND	ND	ND		ND	ND	ND	ND		0.32±0.07	0.72±0.14	0.67±0.12	0.36±0.31		0.40±0.01	1.59±0.27	1.24±0.16	1.30±0.26		0.27±0.06	0.68±0.07	0.55±0.04	0.99±0.16		0.23±0.03	0.46±0.02	0.71±0.10	1.28±0.18		ND	ND	ND	ND		ND	ND
Acetic acid	free	Others	4.33±0.04	4.45±0.08	4.55±0.17	6.37±2.37		4.34±0.02	4.42±0.06	6.64±1.16	7.56±0.10		4.35±0.02	4.35±0.05	4.65±0.15	4.80±0.15		4.31±0.02	4.35±0.06	4.75±0.24	4.91±0.30		4.43±0.13	4.36±0.03	4.48±0.02	4.40±0.10		4.32±0.04	4.35±0.07	4.95±0.13	5.78±0.28		4.40±0.06	4.43±0.06	4.67±0.15	4.92±0.17		4.29±0.00	4.47±0.05	5.11±0.26	5.82±0.46		4.40±0.09	4.33±0.05	4.32±0.03	4.38±0.03		4.37±0.05	4.44±0.03
Hexanoic acid	free	Others	8.82±0.34	18.52±2.43	30.18±8.03	156.60±127.95		10.70±0.54	13.25±1.15	18.94±4.27	21.31±2.08		8.65±0.32	11.13±0.88	22.37±1.31	70.05±17.19		9.42±0.14	17.90±10.69	17.77±3.02	20.62±2.06		9.23±1.56	15.74±2.09	24.37±9.82	18.98±5.80		11.70±1.35	16.81±7.60	16.89±2.26	31.70±6.38		9.56±0.66	11.86±0.65	22.06±6.64	19.98±4.17		8.95±0.32	15.73±1.95	24.03±2.03	23.88±4.51		8.25±0.61	12.35±0.80	12.38±2.53	12.36±1.96		10.58±0.88	14.68±1.97
Octanoic acid	free	Others	ND	ND	ND	ND		ND	ND	ND	ND		ND	ND	ND	ND		ND	ND	ND	ND		ND	ND	ND	ND		ND	ND	ND	ND		ND	ND	ND	ND		ND	ND	ND	ND		ND	ND	ND	ND		ND	ND
IPMP	free	Others	0.18±0.04	0.13±0.01	ND	ND		0.26±0.03	0.30±0.02	0.23±0.04	0.19±0.02		0.19±0.02	0.20±0.02	ND	ND		0.19±0.03	0.22±0.01	0.13±0.00	ND		ND	ND	ND	ND		ND	ND	ND	ND		ND	ND	ND	ND		ND	ND	ND	ND		ND	ND	ND	ND		ND	ND
IBMP	free	Others	0.09±0.00	ND	ND	ND		ND	ND	ND	ND		0.09±0.00	ND	ND	ND		ND	ND	ND	ND		ND	ND	ND	ND		ND	ND	ND	ND		ND	ND	ND	ND		ND	ND	ND	ND		ND	ND	ND	ND		ND	ND
Values are reported as means ± SD of three biological replicates. ND, not detected.
[truncated: 26 more columns]

## Sheet: Supplementary Table 5
Supplementary Table 5. Concentrations of bound volatile compounds in CS, R, MH, and V grapes during development stages (μg/L).
Compounds	Form	Class	14 summer (CS)					14 winter (CS)					15 summer (CS)					15 winter (CS)					14 summer (R)					14 winter (R)					15 summer (R)					15 winter (R)					14 summer (V)					14 winter (V)
			E-L 31	E-L 35	E-L 36	E-L 38		E-L 31	E-L 35	E-L 36	E-L 38		E-L 31	E-L 35	E-L 36	E-L 38		E-L 31	E-L 35	E-L 36	E-L 38		E-L 31	E-L 35	E-L 36	E-L 38		E-L 31	E-L 35	E-L 36	E-L 38		E-L 31	E-L 35	E-L 36	E-L 38		E-L 31	E-L 35	E-L 36	E-L 38		E-L 31	E-L 35	E-L 36	E-L 38		E-L 31	E-L 35
1-Hexanol	bound	C6/C9	12.14±1.68	9.00±1.83	13.88±3.63	16.50±1.82		27.28±1.02	27.35±1.36	48.94±5.86	38.06±4.90		20.09±4.51	15.58±1.33	19.50±4.25	38.45±2.34		6.73±1.15	10.48±0.72	16.15±3.26	32.78±1.66		30.30±1.78	39.15±9.68	35.75±15.42	24.77±1.03		43.14±13.25	53.62±6.35	87.69±11.95	96.42±22.33		19.76±1.31	31.54±2.71	33.84±13.36	69.31±5.09		36.97±5.88	35.61±4.59	52.24±6.74	98.77±15.69		11.41±1.82	8.29±0.83	26.37±5.67	31.01±5.61		14.68±1.24	28.86±5.27
1-Nonanol	bound	C6/C9	1.79±0.01	1.82±0.01	1.87±0.02	1.87±0.04		1.84±0.01	1.90±0.07	1.86±0.01	1.86±0.03		1.87±0.05	1.94±0.04	1.82±0.02	1.81±0.00		1.80±0.04	1.80±0.03	1.85±0.02	1.87±0.02		2.05±0.06	2.02±0.03	1.93±0.04	1.89±0.06		1.98±0.03	1.96±0.07	1.96±0.03	1.93±0.04		1.83±0.01	1.79±0.01	1.82±0.05	1.81±0.05		1.80±0.00	1.80±0.00	1.82±0.01	1.82±0.05		2.04±0.04	1.78±0.01	2.02±0.02	2.03±0.11		2.07±0.03	2.10±0.03
(E,E)-2,4-Hexadienal	bound	C6/C9	ND	ND	ND	ND		ND	ND	ND	ND		ND	ND	ND	ND		ND	ND	ND	ND		ND	ND	ND	ND		ND	ND	ND	ND		ND	ND	ND	ND		ND	ND	ND	ND		ND	ND	ND	ND		ND	ND
2-Hexanol	bound	C6/C9	2.96±0.07	2.95±0.21	2.99±0.18	3.11±0.13		3.11±0.16	3.15±0.07	3.34±0.18	3.00±0.11		3.24±0.15	3.09±0.11	3.07±0.20	3.11±0.09		2.85±0.08	2.84±0.07	2.99±0.07	3.11±0.11		3.08±0.09	2.99±0.12	2.86±0.30	2.87±0.11		3.01±0.17	3.13±0.13	3.10±0.18	3.17±0.04		3.50±0.06	3.45±0.20	3.51±0.36	3.42±0.05		2.87±0.13	2.99±0.07	3.02±0.18	3.42±0.12		2.07±0.10	5.49±0.14	2.05±0.08	2.12±0.10		5.95±0.10	5.89±0.22
(E)-2-Hexen-1-ol	bound	C6/C9	7.43±0.79	9.61±1.98	35.80±11.87	19.44±6.11		14.12±0.99	32.57±1.53	35.66±11.04	36.51±10.39		11.14±2.80	12.17±1.20	17.95±3.09	25.10±2.79		7.76±1.01	12.15±2.35	16.60±2.97	17.47±3.38		13.34±1.81	20.40±2.90	40.18±15.88	20.40±3.63		17.09±3.62	31.33±5.46	331.08±35.10	41.64±5.17		13.23±1.52	19.75±1.41	54.59±38.90	48.23±21.49		16.15±1.61	32.93±6.12	29.95±11.72	30.37±5.06		22.51±4.71	6.06±0.40	36.01±10.25	37.14±14.03		9.00±0.18	16.85±3.13
(Z)-2-Hexen-1-ol	bound	C6/C9	ND	ND	ND	ND		ND	ND	ND	ND		ND	ND	ND	ND		ND	ND	ND	ND		ND	ND	ND	ND		ND	ND	ND	ND		ND	ND	ND	ND		ND	ND	ND	ND		ND	ND	ND	ND		ND	ND
(E)-2-Hexenal	bound	C6/C9	9.15±0.50	11.63±0.29	16.13±5.64	14.82±3.35		10.20±0.84	20.47±3.42	19.26±2.85	14.78±3.12		8.34±0.40	9.42±0.54	11.96±2.31	11.47±0.47		7.68±0.06	9.98±0.74	9.08±0.54	8.96±0.30		8.61±0.10	13.64±1.50	28.03±10.33	11.60±2.01		10.07±0.62	16.84±1.22	158.36±19.58	18.12±2.29		25.32±4.79	30.47±4.51	105.28±55.14	74.82±20.02		28.51±8.83	115.86±36.12	25.02±4.92	25.47±15.38		150.18±0.77	148.29±0.26	153.07±2.16	154.11±2.55		149.79±0.91	153.40±2.87
Hexanal	bound	C6/C9	ND	ND	ND	ND		ND	ND	ND	ND		ND	ND	ND	ND		ND	ND	ND	ND		ND	ND	ND	ND		ND	ND	ND	ND		ND	ND	ND	ND		ND	ND	ND	ND		ND	ND	ND	ND		ND	ND
2-Nonanol	bound	C6/C9	ND	ND	ND	ND		ND	ND	ND	ND		ND	ND	ND	ND		ND	ND	ND	ND		1.80±0.00	1.77±0.00	1.76±0.00	1.76±0.00		1.77±0.00	1.77±0.00	1.77±0.00	1.77±0.00		1.78±0.01	1.77±0.01	1.76±0.00	1.76±0.00		1.78±0.00	1.77±0.00	1.77±0.00	1.78±0.01		ND	ND	ND	ND		ND	ND
Nonanal	bound	C6/C9	1.31±0.35	1.58±0.23	1.48±0.29	1.96±0.16		1.32±0.17	3.03±1.69	1.14±0.09	1.08±0.14		3.15±1.00	1.21±0.05	0.97±0.17	0.85±0.04		3.12±0.53	1.25±0.38	1.07±0.20	1.29±0.32		2.58±0.80	1.75±0.62	1.57±0.20	1.57±0.36		1.28±0.04	1.69±0.23	1.87±0.26	1.58±0.32		16.27±1.52	15.80±1.29	7.62±3.30	8.77±2.53		11.93±1.47	7.83±1.69	4.37±2.54	7.54±9.74		1.61±0.21	1.87±0.52	ND	1.48±0.18		1.97±0.10	1.88±0.42
(Z)-3-Hexen-1-ol	bound	C6/C9	18.80±4.34	12.88±1.15	13.51±1.47	11.82±3.26		14.89±1.38	19.27±3.97	30.38±3.42	15.46±1.81		27.73±6.93	16.63±1.26	13.79±2.02	19.46±0.87		9.63±0.29	12.99±0.31	13.33±1.38	15.38±1.02		18.22±0.75	25.67±2.65	23.49±6.31	19.49±1.19		15.30±2.41	33.03±3.99	36.85±2.05	18.57±2.66		12.80±0.57	29.31±1.08	21.69±4.51	23.49±3.04		21.44±3.19	25.62±1.90	27.81±2.46	29.51±2.36		11.17±0.58	13.34±1.87	27.12±7.75	26.53±4.13		11.34±0.88	11.70±0.99
(E)-3-Hexen-1-ol	bound	C6/C9	ND	ND	ND	2.93±0.26		1.65±0.00	2.81±0.23	4.33±1.35	7.37±1.70		ND	ND	3.29±0.63	3.68±0.26		3.09±0.16	2.42±0.02	4.38±0.41	5.11±1.38		ND	ND	2.23±0.17	2.58±0.08		2.75±0.10	2.39±0.24	2.99±0.14	2.45±0.21		ND	ND	ND	2.78±0.11		ND	2.12±0.04	2.24±0.09	2.74±0.07		ND	ND	2.56±0.17	2.34±0.63		ND	ND
Hexanoic acid, ethyl ester	bound	C6/C9	ND	ND	ND	ND		ND	ND	ND	ND		ND	ND	ND	ND		ND	ND	ND	ND		ND	ND	ND	ND		ND	ND	ND	ND		ND	ND	ND	ND		ND	ND	ND	ND		45.19±0.05	45.14±0.01	45.13±0.03	45.17±0.03		45.11±0.02	45.09±0.00
2H-Pyran, 2-ethenyltetrahydro-2,6	bound	Terpenes	ND	ND	ND	ND		ND	ND	ND	ND		ND	ND	ND	ND		ND	ND	ND	ND		ND	ND	ND	ND		ND	ND	ND	ND		ND	ND	ND	ND		ND	ND	ND	ND		ND	ND	ND	ND		ND	ND
Cyclohexene, 1,5,5-trimethyl-3-methylene-	bound	Terpenes	ND	ND	ND	ND		ND	ND	ND	ND		ND	ND	ND	ND		ND	ND	ND	ND		ND	ND	ND	ND		ND	ND	ND	ND		ND	ND	ND	ND		ND	ND	ND	ND		ND	ND	ND	ND		ND	ND
β-Myrcene	bound	Terpenes	ND	ND	ND	ND		ND	ND	ND	ND		ND	ND	ND	ND		ND	ND	ND	ND		10.75±1.15	5.16±0.12	5.13±0.87	4.72±0.25		5.83±0.60	5.05±0.40	5.51±0.16	7.22±0.47		7.81±0.69	5.91±0.44	5.18±0.64	5.08±0.27		6.79±0.34	5.02±0.23	5.66±0.53	7.18±0.69		ND	ND	ND	ND		ND	ND
α-phellandrene	bound	Terpenes	ND	ND	ND	ND		ND	ND	ND	ND		ND	ND	ND	ND		ND	ND	ND	ND		ND	ND	ND	ND		ND	ND	ND	ND		ND	ND	ND	ND		ND	ND	ND	ND		ND	ND	ND	ND		ND	ND
α-Terpinene	bound	Terpenes	ND	ND	ND	ND		ND	ND	ND	ND		ND	ND	ND	ND		ND	ND	ND	ND		2.07±0.12	1.72±0.02	1.77±0.08	1.69±0.03		2.23±0.20	2.05±0.12	2.04±0.02	1.92±0.02		1.88±0.17	1.80±0.06	1.68±0.03	1.72±0.02		2.30±0.12	1.92±0.06	1.95±0.04	2.09±0.09		ND	ND	ND	ND		ND	ND
D-Limonene	bound	Terpenes	ND	ND	ND	ND		ND	ND	ND	ND		ND	ND	ND	ND		ND	ND	ND	ND		8.68±0.22	8.46±0.03	8.52±0.10	8.44±0.02		9.08±0.22	8.81±0.16	8.77±0.04	8.64±0.02		8.74±0.09	8.57±0.04	8.49±0.07	8.48±0.04		9.16±0.12	8.68±0.04	8.68±0.07	8.86±0.12		8.30±0.02	ND	ND	ND		8.30±0.01	8.30±0.03
β-Phellandrene	bound	Terpenes	ND	ND	ND	ND		ND	ND	ND	ND		ND	ND	ND	ND		ND	ND	ND	ND		ND	ND	ND	ND		ND	ND	ND	ND		ND	ND	ND	ND		ND	ND	ND	ND		ND	ND	ND	ND		ND	ND
(Z)-β-Ocimene	bound	Terpenes	ND	ND	ND	ND		ND	ND	ND	ND		ND	ND	ND	ND		ND	ND	ND	ND		4.70±0.36	3.37±0.03	3.40±0.22	3.28±0.07		3.45±0.15	3.29±0.09	3.41±0.03	3.75±0.10		3.92±0.18	3.45±0.08	3.34±0.13	3.30±0.04		3.62±0.10	3.30±0.03	3.41±0.12	3.67±0.13		3.23±0.07	ND	ND	ND		3.35±0.08	3.26±0.09
γ-Terpinene	bound	Terpenes	ND	ND	ND	ND		ND	ND	ND	ND		ND	ND	ND	ND		ND	ND	ND	ND		1.96±0.04	1.71±0.02	1.76±0.06	1.70±0.02		2.17±0.19	2.03±0.11	2.05±0.01	1.92±0.01		1.88±0.09	1.78±0.06	1.74±0.08	1.73±0.03		2.21±0.16	1.95±0.07	1.93±0.05	2.21±0.16		ND	ND	ND	ND		ND	ND
(E)-β-Ocimene	bound	Terpenes	ND	ND	ND	ND		ND	ND	ND	ND		ND	ND	ND	ND		ND	ND	ND	ND		5.78±0.62	3.63±0.04	3.66±0.35	3.50±0.12		3.92±0.40	3.53±0.15	3.69±0.04	4.25±0.14		4.55±0.25	3.80±0.12	3.55±0.17	3.53±0.07		4.14±0.25	3.50±0.07	3.73±0.26	4.14±0.22		3.43±0.13	ND	3.10±0.01	3.17±0.08		3.70±0.09	3.52±0.09
3,8-p-Menthadiene	bound	Terpenes	ND	ND	ND	ND		ND	ND	ND	ND		ND	ND	ND	ND		ND	ND	ND	ND		ND	ND	ND	ND		ND	ND	ND	ND		ND	ND	ND	ND		ND	ND	ND	ND		ND	ND	ND	ND		ND	ND
Terpinolene	bound	Terpenes	ND	ND	ND	ND		ND	ND	ND	ND		ND	ND	ND	ND		ND	ND	ND	ND		1.99±0.09	1.71±0.03	1.76±0.07	1.70±0.02		2.20±0.17	2.01±0.13	1.97±0.01	1.88±0.01		1.94±0.09	1.81±0.04	1.74±0.05	1.74±0.02		2.28±0.12	1.91±0.05	1.92±0.04	2.07±0.09		ND	ND	ND	ND		ND	ND
Isoterpinolene	bound	Terpenes	ND	ND	ND	ND		ND	ND	ND	ND		ND	ND	ND	ND		ND	ND	ND	ND		ND	ND	ND	ND		ND	ND	ND	ND		ND	ND	ND	ND		ND	ND	ND	ND		ND	ND	ND	ND		ND	ND
Rose oxide	bound	Terpenes	ND	ND	ND	ND		ND	ND	ND	ND		ND	ND	ND	ND		ND	ND	ND	ND		ND	ND	ND	ND		ND	ND	ND	ND		ND	ND	ND	ND		ND	ND	ND	ND		ND	ND	ND	ND		ND	ND
trans-rose oxide	bound	Terpenes	ND	ND	ND	ND		ND	ND	ND	ND		ND	ND	ND	ND		ND	ND	ND	ND		ND	ND	ND	ND		ND	ND	ND	ND		ND	ND	ND	ND		ND	ND	ND	ND		ND	ND	ND	ND		ND	ND
(E,Z)-alloociene	bound	Terpenes	ND	ND	ND	ND		ND	ND	ND	ND		ND	ND	ND	ND		ND	ND	ND	ND		3.43±0.11	3.04±0.01	3.04±0.07	3.00±0.01		3.05±0.03	3.01±0.02	3.03±0.01	3.15±0.03		3.24±0.05	3.09±0.04	3.04±0.04	3.03±0.01		3.12±0.03	3.02±0.01	3.06±0.03	3.16±0.04		ND	ND	ND	ND		ND	ND
(E,E)-alloociene	bound	Terpenes	ND	ND	ND	ND		ND	ND	ND	ND		ND	ND	ND	ND		ND	ND	ND	ND		ND	ND	ND	ND		ND	ND	ND	ND		ND	ND	ND	ND		ND	ND	ND	ND		3.08±0.04	ND	ND	ND		3.18±0.04	3.13±0.03
cis-Furan linalool oxide	bound	Terpenes	2.58±0.57	1.98±0.79	1.58±0.16	1.99±0.31		5.47±0.55	4.21±1.05	6.55±1.00	3.55±0.72		3.51±0.57	2.01±0.18	1.51±0.17	1.47±0.10		2.39±0.45	2.95±0.36	2.18±0.35	2.51±0.33		5.91±0.79	3.89±0.35	7.10±2.30	3.92±0.45		24.66±8.39	17.92±7.59	30.44±3.04	15.54±1.15		8.04±2.59	5.21±0.79	5.68±1.57	4.55±0.07		25.56±6.07	13.79±2.17	11.64±2.13	14.47±2.93		8.23±5.67	1.84±0.14	2.11±0.18	3.37±0.69		4.17±0.63	3.20±0.58
1,3,8-p-Menthatriene	bound	Terpenes	ND	ND	ND	ND		ND	ND	ND	ND		ND	ND	ND	ND		ND	ND	ND	ND		ND	ND	ND	ND		ND	ND	ND	ND		ND	ND	ND	ND		ND	ND	ND	ND		ND	ND	ND	ND		ND	ND
trans-Furan linalool oxide	bound	Terpenes	1.80±0.07	1.89±0.75	1.40±0.11	1.66±0.23		3.49±0.42	2.41±0.29	3.97±0.54	2.39±0.38		2.14±0.13	1.71±0.10	1.22±0.11	1.32±0.07		1.82±0.21	2.11±0.12	1.82±0.33	1.87±0.19		3.76±0.63	3.88±0.48	5.78±1.85	3.57±0.67		15.89±5.63	16.53±8.69	26.89±4.23	11.12±0.69		5.69±1.39	4.68±0.99	5.13±1.41	4.50±0.22		19.22±4.38	10.34±1.64	9.34±2.51	11.57±1.82		4.18±2.74	1.53±0.04	1.78±0.13	2.42±0.49		2.24±0.13	1.91±0.17
Nerol oxide	bound	Terpenes	ND	ND	ND	ND		ND	ND	ND	ND		ND	ND	ND	ND		ND	ND	ND	ND		4.16±0.00	4.16±0.00	4.17±0.01	4.16±0.00		4.18±0.01	4.21±0.04	4.19±0.00	4.20±0.00		4.16±0.00	4.17±0.00	4.17±0.00	4.18±0.00		4.18±0.01	4.18±0.01	4.19±0.00	4.21±0.02		ND	ND	ND	4.17±0.01		ND	ND
Citronellal	bound	Terpenes	ND	ND	ND	ND		ND	ND	ND	ND		ND	ND	ND	ND		ND	ND	ND	ND		ND	ND	ND	ND		ND	ND	ND	ND		ND	ND	ND	ND		ND	ND	ND	ND		ND	ND	ND	ND		ND	ND
Camphor	bound	Terpenes	ND	ND	ND	ND		ND	ND	ND	ND		ND	ND	ND	ND		ND	ND	ND	ND		ND	ND	ND	ND		ND	ND	ND	ND		ND	ND	ND	ND		ND	ND	ND	ND		1.07±0.02	ND	1.06±0.01	1.11±0.07		1.13±0.02	1.12±0.02
Bornylene	bound	Terpenes	ND	ND	ND	ND		ND	ND	ND	ND		ND	ND	ND	ND		ND	ND	ND	ND		1.96±0.14	1.69±0.00	1.69±0.06	1.77±0.03		2.37±0.27	2.22±0.06	2.43±0.06	2.09±0.02		1.83±0.11	ND	ND	ND		2.56±0.21	1.99±0.12	2.03±0.06	2.69±0.38		ND	ND	ND	ND		ND	ND
Linalool	bound	Terpenes	1.39±0.01	1.35±0.02	1.34±0.00	1.35±0.00		1.49±0.01	1.41±0.01	1.38±0.01	1.36±0.01		1.42±0.01	1.37±0.00	1.36±0.00	1.38±0.01		1.37±0.01	1.35±0.00	1.35±0.01	1.36±0.01		2.15±0.22	1.59±0.10	1.64±0.09	1.55±0.03		3.49±0.55	2.40±0.48	2.63±0.13	2.30±0.01		3.00±0.55	1.68±0.08	1.54±0.05	1.76±0.33		5.12±0.61	2.01±0.23	1.79±0.05	1.99±0.20		1.58±0.11	1.44±0.00	1.45±0.04	1.53±0.04		1.60±0.00	1.55±0.06
p-Menthan-8-ol	bound	Terpenes	0.89±0.06	ND	ND	ND		ND	ND	ND	ND		1.16±0.15	0.67±0.04	0.62±0.01	0.63±0.02		ND	ND	ND	ND		ND	ND	0.62±0.02	ND		ND	ND	ND	ND		1.26±0.21	0.73±0.07	0.60±0.03	0.73±0.02		ND	ND	ND	ND		ND	ND	ND	ND		ND	ND
Terpinen-4-ol	bound	Terpenes	3.67±0.03	3.52±0.02	3.52±0.01	3.55±0.01		3.76±0.07	3.70±0.04	3.77±0.05	3.81±0.10		3.88±0.10	3.63±0.03	3.58±0.03	3.57±0.01		3.60±0.03	3.65±0.03	3.60±0.02	3.70±0.06		4.10±0.17	3.65±0.05	3.81±0.02	3.79±0.04		5.38±0.36	5.00±0.43	5.06±0.04	4.42±0.08		3.90±0.14	3.88±0.09	3.74±0.07	3.75±0.02		5.00±0.31	4.36±0.30	4.54±0.08	5.05±0.29		ND	ND	ND	ND		ND	ND
Hotrienol	bound	Terpenes	ND	ND	ND	ND		ND	ND	ND	ND		ND	ND	ND	ND		ND	ND	ND	ND		4.08±0.06	3.52±0.01	3.49±0.01	3.45±0.00		3.69±0.06	3.59±0.03	3.64±0.02	3.60±0.02		3.63±0.03	ND	ND	ND		6.42±1.05	3.60±0.05	ND	ND		ND	ND	ND	ND		ND	ND
p-Menth-1-en-9-al	bound	Terpenes	ND	ND	ND	ND		ND	ND	ND	ND		ND	ND	ND	ND		ND	ND	ND	ND		ND	ND	ND	ND		ND	ND	ND	ND		ND	ND	ND	ND		ND	ND	ND	ND		ND	ND	ND	ND		ND	ND
Menthol	bound	Terpenes	3.70±0.03	3.64±0.03	3.63±0.03	3.71±0.05		3.72±0.11	3.71±0.10	3.65±0.03	3.67±0.01		3.75±0.01	3.76±0.01	3.68±0.04	3.74±0.02		3.61±0.02	3.61±0.01	3.66±0.07	3.69±0.00		3.72±0.01	3.68±0.05	3.69±0.02	3.69±0.04		3.69±0.02	3.67±0.01	3.68±0.02	3.68±0.03		3.96±0.05	3.88±0.05	3.78±0.05	3.79±0.02		3.81±0.05	3.74±0.02	3.79±0.02	3.75±0.07		4.22±0.10	3.71±0.01	4.15±0.08	4.17±0.31		3.99±0.06	3.93±0.06
Isoborneol	bound	Terpenes	1.10±0.03	ND	ND	ND		ND	ND	ND	ND		1.26±0.05	ND	ND	ND		ND	ND	ND	ND		ND	ND	ND	ND		ND	ND	ND	ND		1.26±0.09	ND	0.31±0.54	0.81±0.26		ND	ND	ND	ND		ND	ND	ND	ND		ND	ND
trans-Ocimenol	bound	Terpenes	ND	ND	ND	ND		ND	ND	ND	ND		ND	ND	ND	ND		ND	ND	ND	ND		ND	ND	ND	ND		ND	ND	ND	ND		ND	ND	ND	ND		ND	ND	ND	ND		ND	ND	ND	ND		ND	ND
Neral	bound	Terpenes	ND	ND	ND	ND		ND	ND	ND	ND		ND	ND	ND	ND		ND	ND	ND	ND		ND	ND	ND	ND		ND	ND	ND	ND		ND	ND	ND	ND		ND	ND	ND	ND		4.39±0.18	ND	4.10±0.01	4.32±0.29		4.11±0.08	4.19±0.12
α-Terpineol	bound	Terpenes	2.70±0.33	1.07±0.28	0.93±0.08	1.22±0.04		4.12±0.93	2.36±0.35	2.86±0.29	2.45±0.60		4.49±0.69	1.62±0.15	1.18±0.17	1.05±0.06		1.60±0.19	1.81±0.16	1.46±0.28	1.91±0.41		10.57±1.42	3.93±0.91	5.33±1.37	4.05±0.30		25.85±5.85	15.91±4.96	14.45±0.67	8.03±0.21		10.62±2.35	7.50±0.92	5.21±1.66	5.22±0.53		33.99±1.53	15.27±2.73	14.20±1.88	17.90±3.51		0.68±0.05	1.00±0.05	0.61±0.02	0.63±0.05		1.01±0.04	0.95±0.05
γ-Terpineol	bound	Terpenes	ND	ND	ND	ND		ND	ND	ND	ND		ND	ND	ND	ND		ND	ND	ND	ND		0.86±0.02	0.66±0.02	0.64±0.04	0.64±0.02		0.64±0.03	0.65±0.02	0.66±0.01	0.60±0.01		0.88±0.06	1.30±1.01	0.64±0.04	0.67±0.01		0.84±0.03	0.72±0.03	0.71±0.03	0.73±0.03		ND	ND	ND	ND		ND	ND
p-Mentha-1,5-dien-8-ol	bound	Terpenes	ND	ND	ND	ND		ND	ND	ND	ND		ND	ND	ND	ND		ND	ND	ND	ND		ND	ND	ND	ND		ND	ND	ND	ND		ND	ND	ND	ND		ND	ND	ND	ND		ND	ND	ND	ND		ND	ND
Geranial	bound	Terpenes	ND	ND	ND	ND		ND	ND	ND	ND		ND	ND	ND	ND		ND	ND	ND	ND		10.69±1.99	5.31±0.21	5.46±0.58	4.87±0.33		4.79±0.34	4.80±0.15	5.43±0.16	6.91±0.54		6.57±0.23	6.28±0.22	6.16±0.23	6.24±0.08		6.21±0.05	5.98±0.12	6.50±0.17	7.66±0.46		8.09±0.75	4.47±0.05	4.86±0.05	5.09±0.58		8.35±0.05	8.29±1.20
trans-Pyran linalool oxide	bound	Terpenes	0.99±0.10	0.98±0.17	0.96±0.03	1.07±0.08		1.67±0.11	1.42±0.17	1.93±0.29	1.30±0.15		1.12±0.05	0.97±0.06	0.92±0.09	0.89±0.03		1.01±0.09	1.24±0.12	1.07±0.15	1.22±0.14		1.53±0.13	1.40±0.13	1.85±0.47	1.47±0.04		3.36±0.79	3.06±1.27	4.66±0.44	3.28±0.07		1.81±0.31	1.59±0.31	1.73±0.42	1.43±0.20		3.69±0.51	2.64±0.24	2.59±0.56	3.25±0.19		ND	ND	ND	ND		ND	ND
cis-Pyran linalool oxide	bound	Terpenes	0.69±0.25	0.79±0.64	0.70±0.31	0.73±0.27		0.77±0.08	0.69±0.10	1.08±0.29	0.60±0.18		1.57±0.33	1.30±0.03	0.82±0.10	0.90±0.10		0.94±0.18	1.05±0.05	ND	ND		ND	5.14±1.23	7.20±3.50	3.43±0.10		12.65±4.14	14.46±8.76	21.61±5.12	9.26±0.31		10.33±2.57	6.68±1.84	7.51±3.38	4.71±0.97		23.22±2.05	11.81±0.65	11.10±4.52	12.93±0.87		ND	ND	ND	ND		ND	ND
p-Mentha-1(7),2-dien-8-ol	bound	Terpenes	ND	ND	ND	ND		ND	ND	ND	ND		ND	ND	ND	ND		ND	ND	ND	ND		ND	ND	ND	ND		ND	ND	ND	ND		ND	ND	ND	ND		ND	ND	ND	ND		ND	ND	ND	ND		ND	ND
γ-Geraniol	bound	Terpenes	2.09±0.05	ND	2.00±0.01	2.03±0.01		2.07±0.06	2.05±0.01	2.05±0.03	2.00±0.02		2.25±0.08	2.08±0.00	2.02±0.05	2.01±0.01		ND	ND	ND	2.02±0.01		2.89±0.13	2.39±0.07	2.33±0.21	2.29±0.01		2.60±0.10	2.55±0.10	2.71±0.08	2.51±0.06		3.02±0.12	2.53±0.14	2.40±0.17	2.38±0.02		2.88±0.04	2.40±0.07	2.55±0.17	2.94±0.18		2.52±0.13	2.33±0.04	2.48±0.09	2.72±0.32		2.69±0.10	2.68±0.08
Citronellol	bound	Terpenes	0.88±0.16	ND	ND	ND		ND	ND	ND	ND		0.96±0.11	0.67±0.01	ND	ND		ND	ND	ND	ND		5.72±0.52	1.57±0.17	1.56±0.51	1.16±0.08		3.13±0.58	2.46±0.76	2.95±0.40	1.82±0.08		4.87±0.72	2.32±0.40	1.59±0.51	1.17±0.10		4.60±0.07	2.24±0.15	2.04±0.46	2.79±0.39		1.60±0.32	0.79±0.01	0.78±0.02	0.91±0.23		1.51±0.03	1.36±0.11
Myrtenol	bound	Terpenes	ND	ND	ND	ND		ND	ND	ND	ND		ND	ND	ND	ND		ND	ND	ND	ND		3.53±0.09	2.26±0.08	2.39±0.21	2.41±0.06		4.02±0.59	3.98±0.58	3.95±0.18	2.79±0.12		3.72±0.33	2.75±0.06	2.45±0.25	2.31±0.02		5.05±0.40	3.19±0.22	3.08±0.33	3.22±0.21		ND	ND	ND	ND		ND	ND
Nerol	bound	Terpenes	2.03±0.05	ND	2.03±0.02	2.11±0.05		2.03±0.03	2.05±0.01	2.02±0.03	1.93±0.08		2.13±0.02	2.08±0.02	2.08±0.04	2.08±0.01		ND	ND	2.01±0.04	2.15±0.03		4.02±0.18	2.88±0.08	2.94±0.53	2.63±0.09		3.22±0.35	3.61±0.45	3.42±0.11	3.49±0.32		4.07±0.28	3.69±0.12	3.12±0.47	3.20±0.17		4.24±0.43	3.01±0.11	3.56±0.53	4.86±0.59		2.67±0.19	2.57±0.05	2.91±0.16	3.25±0.53		2.56±0.05	3.09±0.26
cis-Isogeraniol	bound	Terpenes	ND	ND	ND	ND		ND	ND	ND	ND		ND	ND	ND	ND		ND	ND	ND	ND		ND	ND	ND	ND		ND	ND	ND	ND		ND	ND	ND	ND		ND	ND	ND	ND		ND	ND	ND	ND		ND	ND
trans-Isogeraniol	bound	Terpenes	ND	ND	ND	ND		ND	ND	ND	ND		ND	ND	ND	ND		ND	ND	ND	ND		2.06±0.00	ND	ND	ND		ND	ND	ND	ND		2.16±0.01	1.96±0.02	1.88±0.04	1.92±0.01		1.96±0.03	1.88±0.03	1.94±0.03	1.92±0.02		ND	ND	ND	ND		ND	ND
Geraniol	bound	Terpenes	2.95±0.70	2.08±0.08	2.14±0.03	2.26±0.07		2.28±0.07	2.31±0.04	2.19±0.04	2.09±0.03		3.52±0.38	2.44±0.04	2.24±0.09	2.22±0.02		2.03±0.03	2.04±0.02	2.09±0.09	2.34±0.04		37.65±4.06	9.12±0.82	8.71±3.74	7.25±0.88		7.77±1.52	6.10±0.76	7.91±0.24	16.72±2.59		25.90±2.36	14.43±1.93	10.82±3.38	10.21±0.92		14.02±1.48	8.89±1.04	12.63±2.87	20.08±2.97		22.86±5.14	7.25±0.74	8.54±0.79	10.19±3.67		25.16±1.66	18.32±2.84
endo-Borneol	bound	Terpenes	2.57±1.24	1.07±0.03	1.07±0.03	1.11±0.02		1.35±0.02	1.33±0.03	1.37±0.05	1.27±0.05		4.70±0.98	1.79±0.19	1.43±0.04	1.46±0.08		1.23±0.04	1.35±0.04	1.26±0.09	1.24±0.02		1.52±0.19	1.33±0.01	1.50±0.13	1.31±0.03		1.65±0.17	1.75±0.15	1.93±0.06	1.44±0.05		4.04±0.73	1.87±0.23	1.47±0.16	1.77±0.05		2.03±0.01	1.65±0.09	1.67±0.14	1.73±0.11		1.41±0.01	1.26±0.01	1.24±0.06	1.38±0.12		1.44±0.03	1.40±0.02
Geranic acid	bound	Terpenes	ND	ND	ND	ND		ND	ND	ND	ND		ND	ND	ND	ND		ND	ND	ND	ND		ND	ND	ND	ND		ND	ND	ND	ND		ND	ND	ND	ND		ND	ND	ND	ND		ND	ND	ND	ND		ND	ND
Isophorone	bound	Terpenes	ND	ND	3.87±0.06	3.90±0.08		4.02±0.10	3.90±0.09	ND	ND		ND	ND	3.86±0.05	3.96±0.08		3.80±0.02	3.86±0.02	ND	ND		ND	ND	ND	ND		ND	ND	ND	ND		3.97±0.06	3.90±0.06	ND	ND		ND	ND	3.94±0.14	3.91±0.21		4.01±0.08	ND	ND	4.17±0.20		3.82±0.00	3.84±0.06
6-Methyl-5-hepten-2-one	bound	Norisoprenoids	ND	ND	ND	ND		ND	ND	ND	ND		ND	ND	ND	ND		ND	ND	ND	ND		ND	ND	ND	ND		ND	ND	ND	ND		ND	ND	ND	ND		ND	ND	ND	ND		4.41±0.10	4.65±0.02	4.33±0.10	4.50±0.29		4.80±0.10	4.68±0.05
6-Methyl-5-hepten-2-ol	bound	Norisoprenoids	1.26±0.01	1.12±0.03	1.21±0.01	1.43±0.02		1.18±0.03	1.15±0.01	1.13±0.01	1.10±0.01		1.39±0.11	1.21±0.02	1.12±0.02	1.15±0.01		1.04±0.02	1.04±0.01	1.07±0.03	1.08±0.02		2.16±0.19	1.34±0.04	1.30±0.11	1.27±0.01		1.44±0.07	1.37±0.06	1.40±0.04	1.26±0.02		1.61±0.13	1.39±0.10	1.34±0.12	1.38±0.03		1.60±0.03	1.30±0.03	1.36±0.06	1.59±0.18		1.59±0.08	1.41±0.04	1.54±0.04	1.68±0.20		1.46±0.02	1.41±0.01
trans-Theaspirane	bound	Norisoprenoids	ND	ND	ND	ND		ND	ND	ND	ND		ND	ND	ND	ND		ND	ND	ND	ND		ND	ND	ND	ND		ND	ND	ND	ND		ND	ND	ND	ND		ND	ND	ND	ND		0.76±0.02	ND	ND	ND		ND	ND
α-Cyclogeraniol	bound	Norisoprenoids	ND	ND	ND	ND		ND	ND	ND	ND		ND	ND	ND	ND		ND	ND	ND	ND		16.58±0.12	14.88±0.16	14.63±0.27	14.67±0.16		14.42±0.10	14.46±0.08	14.47±0.05	14.20±0.04		15.57±0.20	14.87±0.13	14.53±0.27	14.65±0.07		15.70±0.25	15.05±0.19	14.92±0.21	15.04±0.15		4.55±0.10	4.00±0.05	3.83±0.08	3.96±0.23		4.17±0.11	4.01±0.08
Geranylacetone	bound	Norisoprenoids	2.20±0.02	2.20±0.03	2.28±0.12	2.28±0.02		2.22±0.01	2.21±0.03	2.20±0.03	2.20±0.01		2.50±0.03	2.41±0.05	2.28±0.03	2.32±0.02		2.24±0.03	2.22±0.02	2.19±0.01	2.18±0.02		2.35±0.09	2.25±0.05	2.23±0.01	2.23±0.03		2.27±0.05	2.24±0.01	2.26±0.04	2.23±0.03		2.66±0.02	2.54±0.03	2.27±0.05	2.37±0.13		2.60±0.09	2.58±0.09	2.56±0.02	2.80±0.28		2.70±0.12	3.20±0.68	2.79±0.12	2.83±0.21		3.75±0.37	3.18±0.29
(E)-2-Octen-1-ol	bound	Alcohols	ND	ND	ND	ND		ND	ND	ND	ND		ND	ND	ND	ND		ND	ND	ND	ND		3.66±0.00	3.68±0.04	3.66±0.03	3.65±0.01		3.66±0.02	3.68±0.02	3.72±0.01	3.74±0.04		3.66±0.01	3.65±0.01	3.66±0.02	3.70±0.04		3.68±0.01	3.66±0.00	3.69±0.02	3.84±0.07		ND	ND	ND	ND		3.70±0.04	3.70±0.01
1-Butanol	bound	Alcohols	21.61±0.91	21.74±0.08	22.18±1.14	24.04±0.92		23.99±2.39	22.96±1.55	26.89±0.50	30.98±1.79		21.86±0.65	21.74±0.77	28.85±2.40	30.23±2.94		21.47±0.38	21.98±0.47	31.82±5.22	28.88±2.08		26.62±1.24	27.16±1.61	47.14±15.83	26.13±0.80		22.83±0.52	26.80±4.28	33.78±2.21	122.28±23.25		24.14±1.63	22.95±1.14	29.83±3.11	39.36±4.54		24.11±1.74	23.48±1.50	34.89±0.79	66.01±5.66		ND	ND	ND	ND		ND	ND
3-Methyl-1-butanol	bound	Alcohols	66.41±5.65	73.19±25.06	76.33±3.89	89.88±10.88		62.62±3.95	61.39±4.20	71.83±2.97	69.96±1.38		76.79±8.78	71.94±9.87	88.13±14.64	81.09±2.35		36.46±3.97	47.69±2.84	73.89±11.08	85.46±6.84		120.86±10.93	122.77±16.13	137.72±38.79	119.20±11.94		101.36±12.65	119.74±20.35	118.82±11.05	124.04±15.18		111.61±4.20	82.97±7.70	86.88±16.68	135.38±10.43		72.66±1.27	69.93±8.50	71.32±7.80	114.56±12.30		90.24±60.53	45.29±3.80	116.12±49.58	219.77±169.89		30.54±4.50	39.03±2.85
1-Decanol	bound	Alcohols	ND	ND	7.61±0.00	7.61±0.00		7.61±0.00	7.61±0.00	7.61±0.00	7.61±0.00		7.61±0.00	7.61±0.01	7.61±0.00	ND		ND	ND	7.61±0.00	7.61±0.00		7.61±0.00	7.61±0.00	7.61±0.00	7.60±0.00		7.62±0.01	7.61±0.01	7.62±0.01	7.61±0.00		ND	ND	ND	ND		ND	ND	ND	ND		7.67±0.01	7.61±0.00	7.67±0.01	7.67±0.02		7.71±0.05	7.68±0.01
1-Dodecanol	bound	Alcohols	ND	ND	ND	ND		ND	ND	ND	ND		ND	ND	ND	ND		ND	ND	ND	ND		ND	ND	ND	ND		ND	ND	ND	ND		ND	ND	ND	ND		ND	ND	ND	ND		22.96±0.00	22.97±0.03	22.96±0.01	22.97±0.05		23.01±0.02	23.00±0.04
1-Heptanol	bound	Alcohols	3.30±0.02	3.26±0.08	3.38±0.09	3.52±0.06		3.39±0.04	3.42±0.10	3.45±0.09	3.53±0.05		3.71±0.20	3.65±0.00	3.45±0.05	3.72±0.06		3.17±0.03	3.21±0.02	3.42±0.14	3.66±0.13		5.03±0.23	4.50±0.38	4.03±0.45	3.92±0.02		4.25±0.26	4.07±0.13	4.38±0.11	4.59±0.25		5.07±0.33	4.43±0.26	4.12±0.52	4.16±0.17		4.28±0.06	3.86±0.15	4.18±0.21	5.26±0.47		3.88±0.13	3.58±0.03	3.99±0.11	4.18±0.41		4.41±0.23	5.78±0.34
1-Heptanol, 2,4-dimethyl-	bound	Alcohols	2.99±0.02	2.99±0.02	3.01±0.02	3.02±0.01		3.00±0.01	2.97±0.03	2.98±0.01	3.01±0.01		3.02±0.01	3.04±0.01	3.00±0.03	3.04±0.01		3.01±0.01	3.00±0.00	3.08±0.06	3.09±0.02		2.98±0.00	3.00±0.01	3.01±0.01	3.00±0.01		3.02±0.01	3.02±0.02	3.02±0.01	3.02±0.01		3.03±0.02	3.09±0.06	3.08±0.03	3.03±0.00		3.05±0.03	3.01±0.02	3.02±0.03	3.02±0.01		3.13±0.04	3.31±0.01	3.06±0.03	3.11±0.09		3.31±0.04	3.30±0.03
1-Hexanol, 2-ethyl-	bound	Alcohols	8.41±0.57	7.84±0.47	8.42±0.38	8.97±0.25		8.58±0.86	8.35±1.46	7.97±0.39	9.01±0.80		10.07±0.34	10.40±0.46	8.28±1.65	12.07±3.31		9.32±0.38	8.87±0.39	11.64±2.61	12.69±1.74		8.58±0.13	8.50±0.17	8.56±0.32	8.67±0.50		9.61±0.39	9.38±0.50	9.46±0.12	9.89±0.16		13.75±0.91	14.62±2.78	14.03±1.18	13.14±0.11		12.02±0.76	10.41±0.39	11.14±1.27	12.02±2.01		6.82±0.56	16.29±0.26	6.56±0.22	8.31±2.25		16.99±0.77	17.57±0.13
1-Octanol	bound	Alcohols	4.34±0.03	4.36±0.06	4.43±0.05	4.52±0.03		4.43±0.04	4.54±0.15	4.45±0.04	4.51±0.01		4.64±0.14	4.60±0.04	4.39±0.05	4.47±0.03		4.26±0.03	4.28±0.04	4.38±0.08	4.48±0.06		5.37±0.12	5.00±0.15	4.75±0.16	4.73±0.05		4.90±0.13	4.92±0.15	4.98±0.08	5.05±0.07		4.98±0.10	4.68±0.10	4.69±0.22	4.68±0.17		4.80±0.05	4.65±0.03	4.81±0.13	5.03±0.39		4.91±0.08	4.40±0.04	4.80±0.06	4.89±0.23		5.11±0.08	5.49±0.16
1-Octen-3-ol	bound	Alcohols	0.99±0.02	0.98±0.04	1.05±0.04	1.21±0.07		1.04±0.05	1.00±0.01	1.10±0.03	1.05±0.03		1.15±0.06	1.04±0.01	0.97±0.03	1.05±0.01		0.92±0.01	0.95±0.00	1.00±0.04	1.15±0.03		1.10±0.02	1.36±0.18	1.31±0.27	1.27±0.05		1.29±0.15	1.33±0.10	1.70±0.04	1.80±0.17		1.23±0.04	1.23±0.07	1.34±0.13	1.80±0.44		1.21±0.03	1.22±0.03	1.50±0.12	2.77±0.53		1.05±0.03	1.05±0.01	1.17±0.03	1.28±0.14		1.27±0.03	1.39±0.07
1-Pentanol	bound	Alcohols	0.56±0.10	0.84±0.04	1.57±0.37	2.12±0.32		1.96±0.15	2.36±0.15	2.91±0.19	2.85±0.26		1.81±0.27	1.44±0.14	2.10±0.21	2.37±0.05		1.06±0.09	1.31±0.12	1.42±0.07	2.00±0.30		1.20±0.15	1.60±0.20	1.67±0.70	1.16±0.12		0.93±0.02	1.81±0.52	2.60±0.24	5.05±1.99		1.09±0.14	0.83±0.08	0.81±0.18	1.45±0.21		0.92±0.11	0.77±0.13	1.42±0.12	3.48±0.31		ND	ND	ND	ND		ND	ND
1-Pentanol, 2-methyl-	bound	Alcohols	2.10±0.11	2.64±0.21	3.00±0.14	3.21±0.19		2.27±0.15	2.51±0.03	2.94±0.06	2.98±0.09		2.44±0.06	2.42±0.06	2.93±0.43	2.80±0.07		2.09±0.09	2.18±0.02	3.52±0.39	3.57±0.36		2.37±0.31	2.91±0.12	3.08±0.25	2.85±0.25		3.24±0.27	3.27±0.35	3.23±0.20	3.42±0.14		2.94±0.26	2.83±0.10	2.80±0.16	2.70±0.22		2.48±0.07	2.49±0.03	2.43±0.14	2.88±0.05		ND	ND	ND	ND		ND	ND
1-Pentanol, 3-methyl-	bound	Alcohols	0.95±0.05	1.08±0.16	1.22±0.06	1.50±0.13		1.06±0.03	1.10±0.09	1.38±0.07	1.42±0.14		0.97±0.15	1.11±0.04	1.47±0.12	1.55±0.11		0.57±0.04	0.75±0.02	0.87±0.12	1.27±0.04		1.24±0.03	1.64±0.13	1.86±0.46	1.78±0.05		1.55±0.16	1.80±0.16	2.00±0.12	2.10±0.31		1.33±0.16	1.37±0.07	1.64±0.21	1.65±0.10		1.34±0.02	1.32±0.12	1.49±0.21	1.87±0.14		ND	ND	ND	ND		ND	ND
1-Pentanol, 4-methyl-	bound	Alcohols	0.17±0.01	0.14±0.06	0.24±0.03	0.30±0.04		0.21±0.03	0.23±0.02	0.36±0.03	0.36±0.01		0.26±0.05	0.21±0.01	0.39±0.15	0.58±0.04		0.05±0.02	0.10±0.02	0.22±0.02	0.46±0.07		0.46±0.03	0.56±0.08	0.67±0.17	0.43±0.06		0.65±0.22	0.72±0.16	0.89±0.26	0.83±0.30		0.42±0.04	0.37±0.03	0.44±0.12	0.67±0.08		0.43±0.05	0.35±0.06	0.44±0.08	0.78±0.07		1.84±1.88	0.61±0.02	1.57±0.66	1.46±0.26		0.66±0.28	0.93±0.02
2-Butanol, 3-methyl-	bound	Alcohols	158.74±6.71	185.74±13.76	182.16±5.56	202.38±8.74		171.86±9.56	194.77±12.94	220.29±3.14	211.49±9.28		160.02±11.04	139.88±13.12	211.37±2.11	200.96±11.12		150.57±11.04	155.02±17.98	127.86±13.99	154.58±24.81		165.26±7.40	190.52±7.40	210.28±47.97	202.12±12.28		165.86±10.72	195.66±11.10	190.63±14.88	206.81±9.64		134.35±11.17	137.84±28.41	163.08±28.24	172.05±9.99		108.32±10.38	120.09±5.62	131.91±5.67	169.92±28.72		ND	ND	ND	ND		ND	ND
2-Buten-1-ol, 3-methyl-	bound	Alcohols	19.31±3.81	54.29±16.67	105.26±12.57	158.67±14.48		36.49±6.34	59.91±3.07	102.61±15.62	70.18±6.63		26.70±4.50	53.92±1.70	149.51±24.56	156.40±5.00		6.33±3.52	16.45±1.89	30.25±0.16	71.62±12.90		19.69±1.96	113.71±23.92	230.14±116.66	151.56±11.17		17.84±3.00	94.83±17.87	135.47±15.14	157.65±25.93		7.38±0.59	48.46±4.77	127.71±36.68	137.89±9.80		10.51±1.01	34.91±6.52	89.07±14.20	156.69±10.64		0.10±0.01	0.66±0.06	1.22±0.18	1.22±0.14		0.08±0.01	0.41±0.05
2-Heptanol	bound	Alcohols	4.17±0.78	1.62±0.27	1.50±0.19	1.97±0.35		2.69±0.26	2.53±0.15	2.32±0.19	1.66±0.19		5.61±1.11	2.54±0.22	1.40±0.34	1.49±0.05		1.91±0.14	2.00±0.17	1.56±0.19	1.76±0.13		6.10±0.16	2.89±0.53	1.61±0.50	2.43±0.53		2.77±0.21	2.11±0.27	2.40±0.13	1.98±0.12		4.88±0.49	3.23±0.83	2.75±0.42	2.75±0.31		4.13±0.27	2.79±0.10	2.61±0.44	3.56±0.53		18.79±2.13	8.53±0.32	8.61±0.99	10.84±2.68		19.53±0.16	15.75±1.19
2-Heptanol, 4-methyl-	bound	Alcohols	3.84±0.28	3.45±0.19	3.67±0.17	3.78±0.14		3.76±0.19	3.68±0.41	3.86±0.21	3.94±0.13		4.56±0.12	4.67±0.19	3.68±0.81	4.36±0.20		4.08±0.22	3.85±0.12	5.25±1.13	5.54±0.62		3.87±0.05	3.71±0.03	3.75±0.16	3.74±0.16		4.30±0.17	4.10±0.22	4.26±0.09	4.38±0.06		6.18±0.28	6.51±1.10	6.21±0.54	5.83±0.14		5.28±0.20	4.61±0.19	4.88±0.51	5.15±0.49		3.89±0.29	7.38±0.23	3.70±0.11	4.41±1.25		7.94±0.31	8.01±0.05
2-Heptanol, 5-methyl-	bound	Alcohols	0.60±0.18	0.60±0.03	0.64±0.03	0.64±0.02		0.65±0.03	0.65±0.09	0.71±0.03	0.69±0.04		0.82±0.02	0.79±0.02	0.65±0.11	0.74±0.04		0.67±0.03	0.67±0.02	0.85±0.16	0.91±0.09		0.69±0.01	0.68±0.01	0.69±0.03	0.67±0.02		0.73±0.04	0.76±0.04	0.79±0.04	0.76±0.02		0.99±0.06	1.10±0.15	1.02±0.09	0.98±0.03		0.90±0.04	0.81±0.01	0.83±0.06	0.90±0.07		0.49±0.06	1.23±0.04	0.41±0.10	0.32±0.09		1.19±0.08	1.24±0.03
2-Heptanol, 6-methyl-	bound	Alcohols	0.28±0.02	0.25±0.02	0.28±0.01	0.30±0.01		0.30±0.02	0.28±0.02	0.29±0.01	0.30±0.01		0.32±0.02	0.32±0.01	0.29±0.04	0.32±0.02		0.29±0.02	0.29±0.01	0.38±0.05	0.39±0.03		0.35±0.02	0.32±0.02	0.31±0.02	0.30±0.02		0.32±0.00	0.33±0.02	0.34±0.01	0.35±0.02		0.43±0.03	0.44±0.04	0.42±0.03	0.41±0.02		0.38±0.02	0.34±0.01	0.34±0.03	0.39±0.05		0.20±0.02	0.46±0.02	0.20±0.02	0.23±0.06		0.41±0.03	0.45±0.02
2-Octanol	bound	Alcohols	0.03±0.00	0.02±0.00	0.03±0.00	0.03±0.00		0.03±0.00	0.03±0.00	0.03±0.00	0.03±0.00		0.05±0.01	0.04±0.00	0.03±0.00	0.03±0.00		0.02±0.00	0.02±0.00	0.02±0.00	0.03±0.00		0.07±0.00	0.06±0.02	0.05±0.02	0.04±0.00		0.04±0.00	0.05±0.01	0.08±0.01	0.07±0.01		0.07±0.01	0.06±0.01	0.09±0.05	0.07±0.01		0.06±0.00	0.05±0.00	0.06±0.00	0.10±0.02		ND	ND	ND	ND		ND	ND
2-Pentanol	bound	Alcohols	ND	ND	ND	ND		ND	ND	ND	ND		ND	ND	ND	ND		ND	ND	ND	ND		ND	ND	ND	ND		ND	ND	ND	ND		ND	ND	ND	ND		ND	ND	ND	ND		3.60±0.08	10.22±0.48	4.21±0.27	3.67±0.91		9.10±0.31	9.03±0.59
3-Buten-1-ol, 3-methyl-	bound	Alcohols	276.48±41.20	180.67±35.71	168.84±19.13	183.63±22.70		252.91±44.67	259.55±13.61	253.96±23.09	203.75±33.06		311.24±62.40	197.49±23.50	181.25±10.08	179.46±3.20		129.41±14.78	141.31±20.99	82.31±15.17	102.09±25.45		353.84±24.28	247.11±8.04	276.10±122.08	193.15±18.62		297.50±31.83	312.15±31.14	330.97±42.41	346.13±33.66		239.30±23.63	148.77±25.56	139.21±45.88	164.05±23.90		199.33±12.81	137.44±20.39	163.42±15.18	281.80±9.50		71.61±14.08	98.69±18.27	107.77±24.03	104.16±15.02		57.71±8.07	55.41±10.89
3-Ethyl-4-methylpentanol	bound	Alcohols	2.12±1.07	16.58±6.91	29.51±6.67	39.01±8.98		3.60±0.42	6.85±0.33	18.59±3.94	15.79±2.35		4.36±1.61	8.57±0.74	14.78±8.84	12.53±0.44		1.40±0.24	5.06±0.34	7.12±1.65	12.37±1.80		2.07±0.68	25.16±8.54	14.91±8.65	22.41±3.96		4.00±1.21	12.98±2.98	31.73±3.36	16.32±0.44		8.80±1.92	10.52±2.81	14.23±4.95	8.94±2.35		17.30±1.56	35.38±8.88	32.10±9.00	40.20±6.40		ND	ND	ND	ND		ND	ND
3-Heptanol	bound	Alcohols	ND	ND	ND	ND		ND	ND	ND	ND		0.11±0.00	0.11±0.01	0.13±0.03	0.12±0.01		0.09±0.01	0.11±0.00	0.22±0.03	0.24±0.02		ND	ND	ND	ND		ND	ND	ND	ND		ND	ND	ND	ND		ND	ND	ND	ND		0.43±0.06	0.21±0.00	0.49±0.08	ND		0.28±0.04	0.29±0.02
3-Octanol	bound	Alcohols	0.05±0.01	0.06±0.02	0.07±0.01	0.11±0.00		0.07±0.01	0.07±0.01	0.07±0.01	0.06±0.00		0.07±0.02	0.07±0.01	0.05±0.01	0.07±0.01		0.04±0.01	0.05±0.00	0.05±0.01	0.08±0.01		0.06±0.01	0.09±0.03	0.09±0.04	0.09±0.01		0.08±0.02	0.10±0.01	0.14±0.01	0.14±0.02		0.08±0.01	0.08±0.02	0.11±0.03	0.30±0.19		0.09±0.01	0.08±0.01	0.12±0.02	0.38±0.16		ND	ND	ND	ND		ND	ND
Benzyl alcohol	bound	Alcohols	385.88±29.68	202.25±44.30	200.31±19.40	419.46±132.99		424.87±91.95	451.11±21.56	402.56±123.91	308.60±37.55		797.54±164.84	445.72±112.12	267.51±101.98	361.81±42.05		222.54±44.41	258.51±14.26	201.48±49.43	375.97±45.89		380.78±56.21	209.13±44.46	189.92±128.54	148.16±26.14		339.20±78.93	266.78±125.94	333.31±49.58	314.70±63.62		291.33±36.02	170.83±53.32	193.04±91.77	144.57±33.92		354.53±17.70	234.33±35.41	252.75±90.34	308.65±48.77		181.81±31.73	102.97±22.15	128.85±15.30	158.07±58.47		258.60±34.43	252.63±42.80
α-Phenylethanol	bound	Alcohols	41.12±0.37	40.31±0.95	39.95±0.04	41.19±0.67		44.33±1.21	43.82±0.39	45.39±2.05	42.96±0.73		43.77±1.38	42.25±1.01	41.73±1.04	42.19±0.79		41.40±0.96	41.88±0.61	41.79±1.27	43.71±0.60		51.72±1.23	43.51±0.70	44.21±3.37	45.21±2.97		55.62±4.93	53.13±2.87	54.62±2.16	48.46±1.03		51.07±2.72	44.83±1.62	44.42±2.81	43.49±0.38		70.46±4.28	49.35±0.92	50.52±3.19	56.85±3.97		42.84±1.05	41.22±0.21	41.89±0.80	43.36±2.29		43.53±0.75	45.17±0.68
β-Phenylethyl alcohol	bound	Alcohols	161.13±0.98	175.78±18.69	165.60±5.44	182.17±12.22		192.80±23.57	204.58±12.70	209.01±31.70	185.02±8.45		220.29±27.77	209.01±27.26	160.31±18.26	171.46±7.46		141.90±6.04	161.25±5.90	154.31±11.52	180.57±6.40		141.49±4.95	179.23±23.02	188.38±43.38	164.54±13.28		177.47±19.93	194.20±29.21	184.34±15.20	183.47±8.53		165.02±8.60	189.45±25.06	193.62±44.65	179.46±15.96		202.68±13.55	187.62±16.58	206.98±45.52	234.46±6.34		138.82±25.55	147.10±4.27	163.44±24.52	157.43±21.49		128.63±6.61	144.67±7.54
3,4-Dimethylbenzyl alcohol	bound	Alcohols	35.61±6.08	58.82±10.00	75.01±25.56	81.30±28.58		75.90±4.41	94.36±25.50	126.22±23.53	131.19±35.39		88.99±35.82	135.55±8.86	83.26±37.04	140.23±44.32		36.78±6.12	63.18±2.87	84.24±22.72	111.59±28.19		125.18±29.77	142.90±48.57	146.04±63.87	131.93±21.42		143.96±27.02	144.20±100.24	128.66±22.45	154.56±35.29		21.91±0.88	28.09±8.70	193.35±156.44	143.29±127.07		54.19±28.14	90.23±54.46	139.84±91.58	148.81±98.03		138.24±24.02	42.63±8.93	183.39±41.99	212.63±109.43		251.35±87.97	256.28±89.05
1-Butanol, 2,3-dimethyl-	bound	Alcohols	ND	ND	ND	ND		ND	ND	ND	ND		ND	ND	ND	ND		ND	ND	ND	ND		ND	ND	ND	ND		ND	ND	ND	ND		ND	ND	ND	ND		ND	ND	ND	ND		1.84±0.08	4.15±0.06	1.99±0.13	2.20±0.29		4.71±0.31	4.89±0.04
Methyl Isobutyl Ketone	bound	Carbonyl compounds	378.55±15.60	381.26±17.18	393.71±16.47	387.84±13.75		368.13±1.86	356.73±13.91	340.18±18.15	326.84±3.70		352.93±5.01	347.05±5.20	395.89±31.48	383.83±16.49		381.18±12.00	372.22±9.47	348.01±12.97	327.24±13.68		380.63±14.35	359.96±10.86	350.45±10.66	366.67±17.85		362.46±5.05	344.03±8.46	333.48±10.25	323.10±4.44		356.31±15.26	340.97±25.43	332.77±14.96	336.85±6.32		330.41±18.01	333.59±17.54	345.22±6.50	336.48±18.98		316.68±16.61	359.50±2.58	319.08±5.47	290.77±20.41		326.79±5.05	321.02±6.75
Heptanal	bound	Carbonyl compounds	ND	ND	ND	ND		ND	ND	ND	ND		ND	ND	ND	ND		ND	ND	ND	ND		ND	ND	ND	ND		ND	ND	ND	ND		3.14±0.11	2.33±0.21	1.79±1.03	1.27±0.43		2.15±0.58	1.53±0.10	0.95±0.30	1.61±2.79		ND	ND	ND	ND		ND	ND
Octanal	bound	Carbonyl compounds	ND	ND	ND	ND		ND	ND	ND	ND		ND	ND	ND	ND		ND	ND	ND	ND		ND	ND	ND	ND		ND	ND	ND	ND		11.26±0.05	11.19±0.03	11.09±0.15	11.07±0.09		11.20±0.01	11.13±0.06	11.03±0.09	11.23±0.41		ND	ND	ND	ND		ND	ND
Decanal	bound	Carbonyl compounds	ND	ND	ND	ND		ND	ND	ND	ND		ND	ND	ND	ND		ND	ND	ND	ND		11.53±0.01	11.52±0.02	11.51±0.01	11.50±0.01		11.51±0.02	11.54±0.02	11.55±0.04	11.55±0.04		11.73±0.04	11.66±0.02	11.69±0.08	11.63±0.10		11.87±0.07	11.76±0.12	11.62±0.10	11.84±0.53		11.59±0.07	7.77±6.73	11.53±0.02	ND		11.76±0.13	11.63±0.09
Furfural	bound	Carbonyl compounds	ND	ND	ND	ND		ND	ND	ND	ND		ND	ND	ND	ND		ND	ND	ND	ND		ND	ND	ND	ND		ND	ND	ND	ND		1.09±0.15	1.26±0.23	0.90±0.25	0.98±0.08		1.12±0.02	1.03±0.06	0.67±0.30	0.84±0.39		ND	ND	ND	ND		ND	ND
(E,E)-2,4-Heptadienal	bound	Carbonyl compounds	ND	ND	ND	ND		ND	ND	ND	ND		ND	ND	ND	ND		ND	ND	ND	ND		ND	ND	ND	ND		ND	ND	ND	ND		ND	ND	ND	ND		ND	ND	ND	ND		ND	ND	ND	ND		9.36±0.01	9.36±0.02
1-Octen-3-one	bound	Carbonyl compounds	ND	ND	ND	ND		ND	ND	ND	ND		ND	ND	ND	ND		ND	ND	ND	ND		ND	ND	ND	ND		ND	ND	ND	ND		ND	ND	ND	ND		ND	ND	ND	ND		ND	ND	ND	ND		ND	ND
2,3-Butanedione	bound	Carbonyl compounds	10.00±7.14	198.93±58.31	253.37±50.00	181.26±72.56		85.26±39.66	206.82±71.53	338.40±60.83	424.50±45.05		9.75±2.77	34.21±9.04	80.36±51.54	58.19±1.88		8.13±2.47	20.40±15.68	105.51±8.82	104.93±29.96		ND	ND	ND	ND		ND	ND	ND	ND		ND	ND	ND	ND		ND	ND	ND	ND		ND	ND	ND	ND		ND	ND
2,3-Pentanedione	bound	Carbonyl compounds	3.55±3.25	34.35±5.04	27.39±6.80	20.60±15.57		36.18±21.84	42.50±9.19	54.92±11.40	57.80±7.36		0.18±0.02	6.77±1.38	6.06±5.12	13.95±3.83		-0.06±0.42	4.79±6.03	8.76±0.79	7.37±2.15		ND	ND	ND	ND		ND	ND	ND	ND		ND	ND	ND	ND		ND	ND	ND	ND		ND	ND	ND	ND		ND	ND
2-Heptanone, 4,6-dimethyl-	bound	Carbonyl compounds	ND	ND	ND	ND		ND	ND	ND	ND		ND	ND	ND	ND		ND	ND	ND	ND		ND	ND	ND	ND		ND	ND	ND	ND		ND	ND	ND	ND		ND	ND	ND	ND		11.36±0.03	11.30±0.04	11.23±0.01	11.29±0.12		11.25±0.03	11.19±0.08
2-Heptanone, 4-methyl-	bound	Carbonyl compounds	11.26±0.11	11.24±0.15	11.22±0.12	11.32±0.20		11.23±0.16	11.24±0.09	11.28±0.18	11.28±0.14		0.44±0.01	0.72±0.12	0.53±0.10	0.75±0.39		0.38±0.06	0.42±0.07	0.43±0.06	0.64±0.15		11.26±0.03	11.38±0.27	11.33±0.06	11.38±0.07		11.36±0.06	11.47±0.19	11.49±0.21	11.50±0.30		11.53±0.12	11.62±0.29	11.60±0.19	11.46±0.09		11.51±0.05	11.38±0.07	11.49±0.29	11.54±0.16		11.70±0.20	11.71±0.09	11.68±0.22	11.94±0.11		11.83±0.16	11.67±0.16
2-Octenal, (E)-	bound	Carbonyl compounds	ND	ND	ND	ND		ND	ND	ND	ND		ND	ND	ND	ND		ND	ND	ND	ND		ND	ND	ND	ND		9.33±0.01	9.33±0.01	9.33±0.00	9.33±0.01		9.40±0.01	9.40±0.01	9.37±0.01	9.38±0.03		9.39±0.02	9.42±0.04	9.39±0.02	9.38±0.04		ND	ND	ND	ND		ND	ND
3-Octanone	bound	Carbonyl compounds	ND	ND	ND	ND		ND	ND	ND	ND		ND	ND	ND	ND		ND	ND	ND	ND		ND	ND	ND	10.91±0.02		10.92±0.01	10.93±0.00	10.95±0.02	10.94±0.01		ND	ND	10.96±0.02	11.13±0.34		10.94±0.04	10.94±0.01	10.98±0.07	11.07±0.03		11.06±0.09	10.96±0.01	11.00±0.05	11.05±0.11		11.05±0.05	10.96±0.03
4-Heptanone, 2,6-dimethyl-	bound	Carbonyl compounds	20.62±0.53	19.42±1.01	20.11±0.42	20.04±0.43		19.61±0.30	18.44±0.99	17.14±0.83	16.46±0.18		22.97±0.32	23.01±0.95	21.28±1.14	21.41±0.38		22.43±0.11	21.25±0.75	23.76±2.86	23.29±1.61		19.33±0.44	18.17±0.26	17.81±0.54	18.01±0.50		18.14±0.26	17.30±0.42	16.91±0.43	16.27±0.11		29.71±1.11	28.84±2.93	25.19±3.12	24.65±1.11		27.42±0.96	24.47±1.72	25.87±1.19	26.30±2.49		48.15±3.68	48.80±1.00	44.51±2.21	48.01±12.72		47.00±1.79	45.49±1.27
Acetophenone	bound	Carbonyl compounds	19.33±0.09	19.18±0.05	19.15±0.06	19.26±0.04		19.26±0.18	19.13±0.21	19.05±0.05	19.03±0.03		20.07±0.10	20.01±0.04	19.41±0.13	19.61±0.17		19.22±0.03	19.38±0.04	21.10±1.20	19.96±0.27		19.05±0.03	18.91±0.02	18.92±0.02	18.92±0.03		19.06±0.05	18.98±0.05	19.00±0.04	18.96±0.04		20.31±0.08	20.12±0.23	20.13±0.14	20.13±0.15		20.70±0.31	19.96±0.05	19.91±0.20	19.95±0.49		19.02±0.06	19.11±0.04	18.92±0.01	19.03±0.16		20.00±0.12	19.88±0.23
Benzaldehyde	bound	Carbonyl compounds	19.31±0.12	19.69±0.15	19.30±0.38	21.62±1.19		19.80±0.21	20.09±0.40	20.02±0.17	20.84±0.46		19.86±0.26	19.40±0.15	19.66±0.07	19.91±0.12		19.21±0.17	19.69±0.55	19.24±0.18	19.76±0.35		20.56±0.31	19.97±0.46	21.01±2.33	20.75±1.65		21.58±2.30	26.21±1.82	25.48±7.71	44.17±22.79		21.33±0.15	21.44±0.46	20.80±1.33	20.85±0.80		20.73±0.29	20.69±0.13	19.76±0.33	20.73±1.30		19.04±0.04	19.03±0.03	18.99±0.01	21.13±2.49		19.30±0.19	21.00±1.36
Benzaldehyde, 3,4-dimethyl-	bound	Carbonyl compounds	22.48±0.74	24.90±1.11	23.10±0.45	32.97±5.71		25.42±2.06	26.60±1.28	28.40±3.79	28.97±3.30		36.94±8.26	25.64±1.08	26.92±4.95	28.00±1.62		21.75±1.15	23.87±0.95	22.94±0.73	25.57±2.70		34.47±1.01	31.44±5.76	34.31±4.12	31.42±3.27		25.43±1.95	40.09±3.32	41.94±5.51	35.26±5.90		164.46±6.56	186.15±51.13	116.70±37.35	116.90±26.39		147.59±17.16	120.77±23.01	69.44±27.17	84.27±38.57		23.10±0.32	25.44±0.95	25.91±2.19	31.32±3.23		29.01±2.63	30.86±3.08
Benzenacetaldehyde	bound	Carbonyl compounds	ND	ND	ND	ND		ND	ND	ND	ND		ND	ND	ND	ND		ND	ND	ND	ND		12.16±0.55	12.38±0.31	12.96±0.77	11.88±0.19		12.18±0.31	12.35±0.39	12.12±0.08	12.33±0.35		13.20±0.16	13.11±0.14	12.55±0.17	12.53±0.22		12.94±0.15	12.66±0.13	12.29±0.33	13.16±1.50		ND	ND	12.30±0.37	ND		11.97±0.37	11.93±0.25
Ethyl Acetate	bound	Esters	11,117.42±5,334.95	5,881.08±997.62	10,080.85±2,204.67	6,992.83±712.42		8,619.44±1,920.65	4,150.40±491.78	4,439.95±1,161.90	3,782.43±404.58		11,120.43±1,145.17	16,830.61±4,436.58	29,099.43±7,047.37	30,506.47±4,944.89		26,007.74±3,756.16	22,322.74±6,466.84	62,482.31±35,405.64	65,984.96±22,844.09		340.30±71.66	234.97±3.55	224.67±1.23	223.70±16.14		236.13±28.33	227.14±19.29	173.62±7.50	169.31±9.92		37,975.71±10,444.93	50,057.15±35,257.59	39,642.62±11,194.81	30,039.63±5,958.70		56,085.02±17,766.23	31,090.71±2,187.89	33,973.05±5,811.53	39,284.48±24,447.26		23,274.72±25,773.52	19,404.23±2,622.68	5,910.68±534.12	56,409.51±86,702.26		1,859.58±189.58	5,668.72±5,357.75
Acetic acid, butyl ester	bound	Esters	2.26±0.49	1.27±0.19	1.95±1.21	0.70±0.20		1.55±0.49	1.01±0.37	0.75±0.27	0.52±0.07		1.32±0.24	0.80±0.14	0.82±0.04	0.59±0.03		0.73±0.08	0.50±0.04	0.74±0.26	0.51±0.03		2.48±0.08	1.38±0.19	1.32±0.27	0.93±0.14		1.00±0.26	0.66±0.10	0.51±0.18	0.43±0.03		1.47±0.13	1.07±0.17	0.99±0.14	0.75±0.07		1.27±0.01	1.05±0.22	0.88±0.14	0.82±0.09		ND	ND	ND	ND		ND	ND
Butanoic acid, ethyl ester	bound	Esters	ND	ND	ND	ND		ND	ND	ND	ND		ND	ND	ND	ND		ND	ND	ND	ND		ND	ND	ND	ND		ND	ND	ND	ND		ND	ND	ND	ND		ND	ND	ND	ND		ND	ND	ND	ND		ND	ND
1-Butanol, 3-methyl-, acetate	bound	Esters	ND	ND	ND	ND		21.57±0.18	20.32±0.54	20.27±0.29	19.92±0.19		ND	ND	ND	ND		ND	ND	ND	ND		21.49±0.12	20.98±0.26	20.41±0.15	21.48±0.51		22.10±1.50	21.42±0.74	20.92±0.12	20.89±0.25		0.01±0.01	ND	ND	ND		ND	ND	ND	ND		ND	19.63±0.14	ND	ND		ND	ND
Hexadecanoic acid, methyl ester	bound	Esters	ND	ND	0.38±0.05	0.69±0.27		0.49±0.29	0.88±1.47	ND	ND		ND	ND	0.14±0.25	0.70±0.51		ND	ND	ND	ND		ND	ND	ND	ND		ND	ND	ND	ND		ND	ND	ND	ND		ND	ND	ND	ND		6.48±0.25	ND	2.04±3.53	8.05±2.48		6.33±0.11	6.33±0.28
Methyl Salicylate	bound	Esters	ND	ND	ND	ND		ND	ND	ND	ND		ND	ND	ND	ND		ND	ND	ND	ND		ND	ND	ND	ND		ND	ND	ND	ND		ND	ND	ND	ND		ND	ND	ND	ND		8.48±0.18	8.67±0.11	8.78±0.10	9.09±0.26		8.53±0.08	11.09±1.12
Toluene	bound	Others	13.00±0.05	12.99±0.05	12.80±0.02	12.83±0.02		12.83±0.04	12.79±0.12	12.73±0.07	12.71±0.02		13.30±0.04	13.32±0.11	12.96±0.30	13.20±0.05		13.01±0.09	12.86±0.06	13.30±0.31	13.18±0.10		12.67±0.10	12.56±0.02	12.54±0.03	12.53±0.04		12.62±0.04	12.53±0.02	12.59±0.02	12.57±0.01		13.52±0.11	13.55±0.25	13.44±0.14	13.31±0.01		13.41±0.06	13.15±0.13	13.24±0.12	13.27±0.13		13.23±0.10	14.99±0.03	13.11±0.05	13.31±0.45		15.27±0.09	15.03±0.08
Indane	bound	Others	5.49±0.00	5.48±0.00	5.48±0.00	5.48±0.00		5.48±0.00	5.48±0.00	5.48±0.00	5.48±0.00		5.53±0.01	5.53±0.00	5.49±0.01	5.50±0.00		5.49±0.00	5.49±0.00	5.52±0.02	5.52±0.01		5.49±0.01	5.48±0.00	5.48±0.00	5.48±0.00		5.48±0.00	5.48±0.00	5.48±0.00	5.48±0.00		5.59±0.04	5.56±0.02	5.55±0.01	5.52±0.00		5.68±0.01	5.63±0.01	5.62±0.02	5.63±0.04		ND	ND	ND	ND		ND	ND
Styrene	bound	Others	9.88±1.17	7.53±0.76	8.37±0.35	7.69±0.27		7.31±0.22	6.90±0.21	6.49±0.31	6.34±0.11		13.98±0.43	15.33±1.96	10.12±0.73	10.95±0.35		6.19±0.14	6.21±0.13	122.96±33.42	55.69±3.28		5.75±0.09	5.39±0.05	5.37±0.05	5.29±0.02		5.48±0.04	5.31±0.05	5.34±0.04	5.33±0.03		12.80±0.17	11.15±1.71	11.20±1.52	10.98±0.88		14.09±2.33	9.48±0.67	9.35±0.60	10.14±1.90		5.44±0.04	36.19±5.74	5.33±0.10	5.47±0.32		8.41±0.36	7.38±0.21
p-Cymene	bound	Others	ND	ND	ND	ND		ND	ND	ND	ND		ND	ND	ND	ND		ND	ND	ND	ND		5.56±0.02	5.49±0.01	5.50±0.01	5.49±0.00		5.59±0.02	5.55±0.02	5.56±0.00	5.53±0.00		5.56±0.01	5.53±0.01	5.51±0.01	5.50±0.00		5.62±0.01	5.54±0.01	5.55±0.01	5.59±0.03		5.48±0.01	ND	ND	5.47±0.01		5.48±0.00	5.48±0.00
Phenol	bound	Others	18.91±3.36	5.58±3.28	7.93±0.52	8.35±0.57		18.46±1.31	12.81±2.29	22.20±10.90	16.25±5.86		40.49±9.98	20.90±4.89	14.87±7.60	15.08±2.22		9.12±2.55	12.86±1.55	10.90±6.48	12.14±1.82		28.18±0.47	10.75±3.33	28.85±9.80	12.58±9.25		23.35±8.82	14.50±6.54	14.15±6.99	18.00±10.64		49.86±7.10	27.47±9.06	15.95±8.35	13.57±1.81		19.08±5.59	9.65±2.04	14.17±7.84	14.85±3.56		24.75±6.70	10.07±2.18	16.72±5.83	21.19±12.58		19.36±4.59	39.82±5.17
p-Cresol	bound	Others	40.37±3.18	20.15±6.36	17.69±1.27	22.16±3.02		38.30±8.32	33.55±0.52	41.50±13.13	24.24±3.25		82.67±17.63	57.85±9.90	30.36±8.19	29.51±3.66		17.95±2.42	26.28±2.12	20.59±6.28	27.82±2.06		105.63±13.38	32.02±7.29	46.23±21.58	31.81±4.41		56.23±6.35	50.36±12.85	44.56±6.81	38.36±3.79		102.11±11.56	56.75±13.61	45.83±19.90	35.66±3.39		61.72±3.89	42.37±4.67	44.04±14.58	47.40±0.92		ND	ND	ND	ND		ND	ND
2-Methoxy-4-vinylphenol	bound	Others	474.91±160.54	241.85±79.09	149.68±46.84	90.63±24.63		473.46±142.55	254.71±17.68	119.49±44.46	110.82±9.44		317.77±236.52	290.55±79.02	45.10±27.84	37.18±8.35		161.02±51.53	126.14±35.09	127.95±18.19	120.19±9.70		1,411.86±407.66	1,071.86±201.67	877.49±783.70	538.05±220.46		1,297.01±543.94	541.48±349.16	672.92±62.45	573.27±211.23		24.27±5.44	16.50±3.37	37.51±37.26	14.12±1.75		57.31±4.67	26.82±6.22	344.60±457.72	56.00±48.91		ND	ND	ND	ND		ND	ND
Thymol	bound	Others	ND	ND	ND	ND		ND	ND	ND	ND		ND	ND	ND	ND		ND	ND	ND	ND		88.22±8.30	38.13±11.75	52.94±20.33	35.84±3.75		152.79±53.18	134.13±31.90	124.69±14.33	63.82±6.01		121.70±24.42	88.24±12.57	59.64±24.25	51.77±1.00		286.36±1.58	137.35±9.18	136.67±33.80	166.25±30.08		ND	ND	ND	ND		ND	ND
Naphthalene	bound	Others	1.65±0.01	1.64±0.00	1.64±0.00	1.65±0.00		1.65±0.01	1.64±0.01	1.65±0.00	1.64±0.00		1.67±0.01	1.67±0.00	1.63±0.01	1.64±0.00		1.64±0.00	1.63±0.00	1.65±0.01	1.65±0.00		1.68±0.01	1.65±0.00	1.65±0.00	1.65±0.00		1.66±0.01	1.65±0.00	1.65±0.00	1.65±0.00		1.72±0.02	1.72±0.01	1.70±0.01	1.70±0.00		1.73±0.01	1.71±0.00	1.71±0.01	1.72±0.04		1.81±0.04	1.66±0.01	1.80±0.00	1.80±0.05		1.94±0.03	1.86±0.02
3-Furanmethanol	bound	Others	ND	ND	ND	ND		ND	ND	ND	ND		ND	ND	ND	ND		ND	ND	ND	ND		0.20±0.01	0.30±0.06	0.34±0.15	0.29±0.07		0.24±0.02	0.30±0.07	0.33±0.07	0.31±0.04		ND	ND	ND	ND		ND	ND	ND	ND		ND	ND	ND	ND		ND	ND
Acetoin	bound	Others	1.48±1.17	26.70±8.67	57.04±15.16	45.81±21.04		3.84±4.00	22.16±13.40	55.95±26.52	72.05±21.98		ND	3.48±2.05	36.05±29.12	8.42±3.39		0.51±0.12	2.06±2.02	79.77±7.39	91.76±24.85		20.36±24.27	70.00±15.85	110.02±92.66	51.48±34.67		161.29±80.21	118.88±64.71	57.91±42.61	65.67±47.49		ND	ND	ND	ND		ND	ND	ND	ND		294.37±38.62	ND	275.86±73.72	381.42±135.97		36.26±55.56	28.09±23.00
Acetic acid	bound	Others	21.91±0.34	24.13±0.87	23.74±0.45	22.64±0.62		23.22±0.57	24.47±1.36	24.74±0.35	25.26±0.31		21.40±0.06	21.76±0.20	23.72±1.90	22.34±0.55		21.89±0.89	21.78±0.32	23.97±0.58	23.28±0.37		24.44±1.71	26.89±1.12	26.40±1.86	24.85±1.52		26.24±2.42	26.45±1.82	25.00±2.51	25.13±1.49		21.46±0.02	21.39±0.21	21.42±0.14	21.27±0.03		21.57±0.08	21.34±0.10	21.35±0.12	21.32±0.05		26.79±0.48	21.63±0.23	27.16±1.66	25.44±4.04		23.60±1.38	23.89±1.61
Hexanoic acid	bound	Others	ND	ND	ND	ND		ND	ND	ND	ND		ND	ND	ND	ND		ND	ND	ND	ND		ND	ND	ND	ND		ND	ND	ND	ND		ND	ND	ND	ND		ND	ND	ND	ND		38.34±0.50	36.95±0.05	38.00±0.55	38.18±1.37		38.92±0.84	37.78±0.32
Octanoic acid	bound	Others	ND	ND	ND	ND		ND	ND	ND	ND		ND	ND	ND	ND		ND	ND	ND	ND		ND	ND	ND	ND		ND	ND	ND	ND		ND	ND	ND	ND		ND	ND	ND	ND		ND	ND	ND	ND		ND	ND
Values are reported as means ± SD of three biological replicates. ND, not detected.
[truncated: 26 more columns]

## Sheet: Supplementary Table 6
Supplementary Table 6. Expression profiles of candidate transcripts related to terpene biosynthesis pathway in CS, R, V, and MH grapes in 2014.
Gene_ID	Annotation	Cabernet Sauvignon (FPKM)							Riesling (FPKM)							Victoria (FPKM)							Muscat Hamburg (FPKM)
		Summer			Winter				Summer			Winter				Summer			Winter				Summer			Winter
		E-L 35	E-L 36	E-L 38	E-L 35	E-L 36	E-L 38		E-L 35	E-L 36	E-L 38	E-L 35	E-L 36	E-L 38		E-L 35	E-L 36	E-L 38	E-L 35	E-L 36	E-L 38		E-L 35	E-L 36	E-L 38	E-L 35	E-L 36	E-L 38
VIT_200s0218g00110	1-deoxy-D-xylulose-5-phosphate synthase, chloroplast precursor	5.81333	1.78333	1.10667	4.56333	1.82333	0.79		2.61333	2.62333	1.16	2.61667	1.04333	0.99		2.42	1.22667	0.966667	3.54667	4.68333	2.41		8.02333	4.21333	4	5.23667	1.94333	1.23667
VIT_204s0008g04970	1-deoxy-D-xylulose-5-phosphate synthase, chloroplast precursor	6.67333	8.17	6.71667	9.38333	10.26	13.69		5.76667	9.05333	6.08333	7.2	8.14333	12.4067		6.54667	9.12667	7.67333	8.86667	13.5667	17.3633		7.73	9.31667	11.4067	11.81	13.45	13.9967
VIT_205s0020g02130	1-deoxy-D-xylulose-5-phosphate synthase, chloroplast precursor	24.0767	14.5333	15.9033	25.5933	13.7067	13.2167		33.25	15.3367	21.2467	39.75	29.5033	30.68		46.6167	21.39	27.0567	52.89	25.3867	32.4933		25.4033	7.38667	9.89667	27.9	18.4967	21.3133
VIT_211s0052g01730	1-deoxy-D-xylulose-5-phosphate synthase	1.09333	0.233333	0.506667	2.88	1.32667	2.96		0.886667	0.97	0.326667	3.76333	0.846667	7.29667		0.513333	1.44	1.08333	2.03	8.01	20.6833		0.51	0.383333	0.416667	0.93	2.50667	2.78667
VIT_211s0052g01780	1-deoxy-D-xylulose-5-phosphate synthase	0.0533333	0	0.0166667	0.246667	0.0933333	0.206667		0.183333	0.08	0.02	0.206667	0.04	0.303333		0	0.0133333	0.04	0.113333	0.193333	0.643333		0.0133333	0	0.0166667	0.0533333	0.12	0.106667
VIT_217s0000g08390	1-deoxy-D-xylulose 5-phosphate reductoisomerase, chloroplast	18.7367	24.13	24.39	30.57	13.2067	19.8467		22.76	20.04	30.4	32.54	16.9933	20.2667		19.7967	15.1067	12.5367	19.8167	21.5733	26.78		14.1233	9.37333	8.46333	19.35	16.41	19.7967
VIT_202s0025g00370	2-C-methyl-D-erythritol 2,4-cyclodiphosphate synthase, chloroplast	40.6733	36.46	34.7733	36.0067	35.9633	26.4833		40.1933	34.68	35.0267	36.3833	33.1867	26.2267		25.42	37.4333	35.7167	32.9167	33.86	41.39		23.36	23.94	31.2267	26.9333	20.0833	25.54
VIT_206s0009g02320	4-diphosphocytidyl-2-C-methyl-D-erythritol kinase, chloroplast precursor	24.4933	21.0667	19.87	18.1067	19.29	18.1167		25.3333	17.2167	18.6967	17.0333	18.0433	16.51		26.1367	18.6	17.8433	20.8767	17.5533	19.6133		23.59	19.4233	21.5133	21.1533	17.37	18.91
VIT_212s0035g01950	4-diphosphocytidyl-2-C-methyl-D-erythritol synthase	11.15	9.39667	10.0533	8.35667	8.24	3.68		11.4933	9.56667	12.6267	8.64667	8.96	5.51		13.0333	8.62667	8.20333	11.3867	6.35	5.07667		6.63	5.29	5.64	6.02667	4.84667	4.51667
VIT_200s0194g00290	4-hydroxy-3-methylbut-2-enyl diphosphate reductase	1.25	1.09667	1.54667	1.23333	0.816667	1.66		0.273333	0.0933333	0.2	0	0.0866667	0		1.28667	0.386667	0.183333	1.19	0.676667	0.813333		1.85	1.14667	1.23667	2.32	2.33333	1.88333
VIT_203s0063g02030	4-hydroxy-3-methylbut-2-enyl diphosphate reductase	392.85	426.797	479.527	300.24	365.733	367.81		374.01	338.35	405.363	281.957	442.947	444.903		281.73	232.34	219.417	319.777	486.047	509.733		318.513	342.34	320.157	309.727	352.803	496.627
VIT_206s0004g02900	Hydroxymethylbutenyl 4-diphosphate synthase	51.2567	52.78	64.1	45.9767	52.3833	65.1		69.7	63.58	72.7367	65.18	62.8433	85.5367		74.1267	46.2633	42.5533	60.9733	68.8933	86.5667		64.4633	56.45	71.0533	72.0567	59.2	90.1267
VIT_204s0023g00600	Isopentenyl diphosphate isomerase 2	170.757	151.737	100.437	206.937	188.55	101.513		25.85	28.0533	29.7333	83.1933	91.83	66.01		170.14	93.3767	92.2833	248.957	165.2	160.157		249.633	140.59	99.6467	220.17	156.15	120.73
VIT_211s0206g00020	Isopentenyl diphosphate isomerase 2	0.156667	0.266667	0.116667	0.0466667	0.133333	0.17		0.673333	1.01333	0.953333	1.72333	2.77667	1.72667		0.02	0	0	0	0	0		2.28333	2.35333	1.61	4.11667	2.55	2.33333
VIT_219s0090g00530	Geranyl diphosphate synthase small subunit	0.37	0.176667	0	0.0233333	0.05	0.01		6.14667	11.02	6.59667	2.83	6.84	6.42667		2.67333	1.29	1.46	2.58333	1.05	2.47		21.3833	18.3	10.2967	23.9233	6.81	13.3133
VIT_215s0024g00850	Geranyl diphosphate synthase	7.90667	10.0133	9.35333	7.89667	9.42333	9.84		7.65	8.65333	9.66333	8.64	8.34333	10.59		7.02	7.48667	7.62333	9.35333	11.32	10.16		9.08333	9.02667	9.02	9.64333	9.66333	8.67667
VIT_205s0020g01240	Geranylgeranyl pyrophosphate synthase	2.62	0.576667	0.58	1.37333	0.696667	0.536667		1.33667	0.33	0.306667	0.876667	0.593333	0.226667		2.6	0.476667	0.223333	0.843333	0.313333	0.17		0.923333	0.14	0.3	0.906667	0.303333	0.156667
VIT_218s0001g12000	Geranylgeranyl pyrophosphate synthetase 1, chloroplast precursor	13.84	14.1033	14.85	12.59	7.16333	4.97667		6.83	6.53333	7.46667	15.59	6.33333	5.12667		9.08667	6.50667	4.54667	13.2233	11.4167	12.7933		7.59667	4.38	4.71333	8.77	5.55333	4.95
VIT_203s0038g03050	Geranylgeranyl pyrophosphate synthetase, chloroplast precursor	22.73	20.9567	21.26	26.3733	22.91	22.12		21.7833	18.9367	22.98	26.2133	23.9833	21.5567		17.8533	29.89	25.8633	35.8733	42.67	41.3533		17.5267	23.0667	22.7433	25.4467	28.8333	26.32
VIT_204s0023g01210	Geranylgeranyl pyrophosphate synthetase 1, chloroplast precursor	0.806667	0.666667	0.563333	1.02333	0.766667	1.86667		2.45333	2.80333	2.71	4.58333	1.89	2.08		3.59	1.52667	1.29	1.72	2.60333	1.21333		2.37	1.45	2.40333	2.44333	3.42333	2.36667
VIT_217s0000g02800	Hydroxymethylglutaryl coenzyme A synthase	17.7833	23.22	23.2567	21.2	20.8267	17.8933		26.5333	32.1533	32.4	32.03	43.0033	23.88		21.7467	41.9333	32.7633	55.9633	39.23	39.8033		38.0467	39.02	34.51	53.2967	42.99	35.6567
VIT_202s0025g04580	Hydroxymethylglutaryl-CoA synthase	230.073	282.323	334.033	275.843	289.483	200.09		142.063	211.803	201.097	174.693	246.5	133.793		159.87	217.997	204.07	291.847	215.217	244.343		264.41	227.427	212.31	294.19	237.707	210.117
VIT_203s0038g04100	3-hydroxy-3-methylglutaryl-coenzyme A reductase 3	25.23	24.1567	28.05	45.6667	37.9933	126.747		30.66	16.2467	17.6567	57.6567	20.2933	75.2367		88.5033	68.3067	44.9933	72.5467	66.8467	70.02		28.7467	57.12	57.5067	24.5567	48.39	61.8067
VIT_204s0044g01740	3-hydroxy-3-methylglutaryl-coenzyme A reductase 3	4.14	0.84	0.17	4.91	0.753333	0.316667		3.12667	1.16	2.06333	5.62667	4.9	6.5		7.3	1.07	1.7	6.77	4.15667	3.57		7.67	1.14667	1.17	15.25	8.51667	3.34333
VIT_218s0122g00610	3-hydroxy-3-methylglutaryl-coenzyme A reductase 3	26.3367	9.42667	4.57	31.8767	19.98	9.19667		20.2	14.9433	13.2367	20.37	21.7167	8.63667		23.0267	18.0567	14.0567	21.4067	6.69333	7.23667		25.7133	19.6633	22.1033	37.08	19.9533	12.7233
VIT_214s0128g00330	Mevalonate kinase (MK)	15.9867	17.9233	15.1267	17.4133	12.0767	11.4033		14.3433	10.49	19.6133	10.9567	11.0067	6.12		17.16	11.29	13.7367	11.3233	3.61667	4.67667		13.63	10.1667	11.5867	14.3233	9.42333	10.2033
VIT_202s0012g02530	Phosphomevalonate kinase	16.6167	13.6567	11.5267	14.89	12.0133	6.11333		16.4133	9.62	17.7467	16.93	14.28	7.25667		20.48	13.62	12.1567	18.58	10.15	8.09		15.98	11.4533	9.74333	15.44	9.22	8.05
VIT_213s0106g00790	Mevalonate diphosphate decarboxylase (MVD1)	17.8233	21.3167	24.84	19.2467	17.9133	25.6433		14.0767	19.7633	16.09	19.19	18.8267	21.6433		11.9133	12.2767	12.1633	17.5533	14.9633	18.3867		15.01	11.7867	12.5467	17.9967	15.0867	14.2633
VIT_219s0015g01010	Farnesyl diphosphate synthase	35.63	28.2233	33.8567	36.13	23.94	21.7833		45.9433	30.72	46.2667	42.9	29.3833	17.26		29.1633	17.8667	17.7867	26.2133	17.4467	26.86		21.48	13.7167	10.2033	22.52	12.4167	20.4767
VIT_212s0134g00020	Isoprene synthase TPS34	0.01	0.01	0.01	0.01	0.01	0.0533333		0.0933333	0.0633333	0.02	0.126667	0.106667	0.603333		0.0133333	0.02	0.01	0.0233333	0.47	0.416667		0.0733333	0.0166667	0.01	0.0633333	0.126667	0.19
VIT_212s0134g00030	E-beta-ocimene synthase TPS35 ocimene synthase	3.14	1.83333	8.38667	0.0266667	0.05	3.89333		0.893333	0.703333	0.746667	0.746667	1.35333	14.9667		0.223333	0.0166667	0.0433333	0.633333	18.9067	35.35		0.103333	0.103333	0.376667	0.426667	0.523333	14.43
VIT_208s0007g06860	Pinene synthase TPS31	0.136667	0.01	0.0166667	0.04	0.0133333	0.07		0.01	0.01	0.01	1.51333	0.263333	0.01		0.66	0.146667	0.34	0.0266667	0.0833333	0.01		0.01	0.0333333	0.01	0.486667	0.0333333	0.0333333
VIT_212s0059g02710	Pinene synthase TPS32	0.08	0.04	0.07	0.226667	0.0333333	0.07		0.0166667	0.01	0.01	0.413333	0.22	0.01		0.32	0.326667	0.2	0.06	0.07	0.01		0.0833333	0.09	0.0133333	0.433333	0.01	0.03
VIT_200s0266g00070	Linalool synthase TPS54	0.0466667	0.06	0.01	0.01	0.01	0.19		0.01	0.27	0.01	0.01	0.01	0.546667		0.01	0.05	0.13	0.0333333	2.98	1.48333		0.01	0.18	0.01	0.01	0.04	0.513333
VIT_200s0271g00060	Linalool synthase TPS56 linalool synthase	0.633333	0.24	0.303333	2.06667	0.18	0.08		1.32	0.296667	1.81333	3.69	0.0666667	0		0.383333	2.58	0.103333	0.216667	0.993333	0.233333		0.203333	0.676667	0.0966667	1.80333	0.256667	0.103333
VIT_200s0385g00010	Linalool synthase TPS59	0.0833333	0.193333	0.01	0.166667	0.07	0.113333		0.01	0.19	0.02	0.01	0.0433333	0.68		0.01	0.01	0.01	0.01	0.933333	0.26		0.07	0.446667	3.10667	0.356667	0.423333	2.24667
VIT_200s0385g00020	Linalool synthase TPS60	0.0466667	0.163333	0.176667	0.01	0.01	0.01		0.01	0.0833333	0.01	0.03	0.01	0.01		0.01	0.01	0.01	0.37	0.886667	0.446667		0.0533333	0.193333	0.516667	0.116667	0.116667	0.116667
VIT_218s0001g04120	(-)-germacrene D synthase TPS04	0.356667	1.13667	3.41333	0.166667	0.413333	0.69		0.253333	0.05	0.0733333	0.0366667	0.0733333	0		0.01	0.02	0.01	0.0266667	0.28	0.41		0.24	0.55	0.52	0.353333	0.266667	2.09667
VIT_218s0001g04220	Germacrene-D synthase TPS06	0.0666667	0.11	0.406667	0.00666667	0.0233333	0.07		0.0266667	0.04	0.01	0	0	0.0233333		0.02	0.01	0.01	0.04	0.146667	0.116667		0.0733333	0.216667	0.243333	0.213333	0.0733333	1.29333
VIT_218s0001g04280	(-)-germacrene D synthase TPS07	0.15	0.203333	1.51	0.163333	0.636667	2.93		5.03667	5.45	1.70667	4.54333	0.903333	1.97		0.28	0.01	0.01	0.37	0.463333	1.18		0.24	0.04	0.0766667	0.43	1.19667	4.22333
VIT_218s0001g04780	(-)-germacrene D synthase TPS10	0.37	1.12333	3.25333	0.14	0.06	0.623333		0.493333	0.126667	0.02	0.603333	0.08	0.0166667		0.0366667	0.0466667	0.02	0.0366667	0.8	0.846667		0.196667	0.88	0.85	0.66	0.33	3.25
VIT_218s0001g05240	(-)-germacrene D synthase TPS14	0.21	0.343333	1.37667	0.0533333	0.03	0.376667		0.386667	0.0433333	0.0866667	0.0366667	0.146667	0.02		0.04	0.01	0.01	0.01	0.196667	0.24		0.0533333	0.493333	0.233333	0.476667	0.16	1.42667
VIT_219s0014g04900	(-)-germacrene D synthase TPS27	0.24	0.32	0.583333	0.203333	0.0333333	0.163333		0.626667	0.0733333	0.446667	1.51667	0.153333	0.01		0.92	0.26	0.283333	0.32	0.01	0.01		0.316667	0.456667	0.0733333	0.133333	0.26	0.0366667
VIT_219s0014g04930	Germacrene-D synthase TPS28	0.686667	3.31	6.98	0.703333	0.163333	1.78333		1.40333	0.21	1.23667	3.19	0.373333	0.0333333		0.856667	0.596667	0.183333	0.136667	0.196667	0.0166667		0.233333	0.533333	0.15	0.263333	0.0966667	0.06
VIT_219s0085g00830	Ent-kaurene synthase TPS69	4.10333	5.92	5.57	3.02333	2.45	4.37333		4.25667	4.52	3.37667	3.19	1.90667	3.14333		2.87333	2.32	2.57333	2.45	3.33	3.80333		6.02	4.38333	5.51333	4.21333	3.30667	5.83333
VIT_215s0046g03550	(+)-neomenthol dehydrogenase	3.29667	2.44667	2.51667	1.05	1.17333	0.58		3.72333	6.62667	6.27333	1.20667	1.66333	0.253333		2.97667	2.50667	2.32667	0.336667	0.09	0.13		4.47333	3.32667	3.28667	0.983333	0.443333	0.253333
VIT_215s0046g03570	(+)-neomenthol dehydrogenase	116.76	72.56	86.31	48.7633	24.4667	22.81		158.027	96.6033	169.653	159.113	60.7267	18.0367		80.04	44.4633	45.0633	35.4667	11.87	4.01		38.7567	22.5833	27.87	46.7467	18.39	10.5233
VIT_215s0046g03580	(+)-neomenthol dehydrogenase	41.5633	41.36	35.5233	32.7033	22.9133	15.4533		24.0333	20.8433	37.5867	22.7833	19.4133	11.14		9.13667	1.06667	0	0.893333	0	0		17.5233	14.9667	10.4833	23.4933	11.8867	9.65
VIT_215s0046g03590	(+)-neomenthol dehydrogenase	40.85	34.38	32.8867	30.05	28.94	14.7633		47.2333	68.92	63.39	24.1733	42.8967	20.99		85.9433	67.31	85.07	60.33	40.0867	25.23		70.9633	47.1133	40.4333	49.12	38.2367	21.6033
VIT_215s0046g03600	(+)-neomenthol dehydrogenase	24.43	23.36	20.83	31.9233	19.0367	18.4033		19.7267	38.3033	38.9267	21.05	17.25	11		53.0267	33.8667	43.4467	20.44	19.5967	9.05333		41.3767	39.4833	44.94	24.2533	26.4	15.34
VIT_215s0046g03650	(+)-neomenthol dehydrogenase	12.11	10.4	10.3433	6.84333	8.27333	7.56		8.06667	9.24	10.4967	4.99	6.60667	4.49333		13.8933	11.1833	14.6033	11.5967	7.75667	7.65		7.25667	5.25667	5.68667	6.07	4.05333	5.13
VIT_202s0012g02820	Geraniol 10-hydroxylase	0.166667	0.213333	0.443333	0.826667	0.446667	0.413333		0.203333	0.34	0.323333	0.133333	0.12	0.676667		0.0866667	0.0866667	0.343333	0.0433333	1.14667	1.47		0.0166667	0.0666667	0.0466667	0.03	0.76	0.546667
VIT_202s0025g04864	Geraniol 10-hydroxylase	90.0367	63.81	97.8333	248.453	248.417	188.233		65.1367	76.4033	47.99	160.48	182.537	169.14		111.273	59.9433	84.6067	306.183	377.55	270.073		8.63333	4.13333	3.45	18.5567	28.45	15.35
VIT_202s0025g04880	Geraniol 10-hydroxylase	25.9433	20.7233	44.4967	119.927	96.33	73.3		24.5433	16.55	23.3333	54.6033	65.36	68.8533		35.62	22.6733	38.0267	100.137	140.41	113.377		2.03333	1.15667	1.13	8.56667	8.40333	5.2
VIT_203s0097g00460	Geraniol 10-hydroxylase	1.38667	2.39667	3.36667	1.93	3.86667	4.57		11.0367	6.32	6.82667	4.53	13.7333	19.6067		1.31667	1.77	2.76	1.88	7.95	6.95667		2.94667	2.73	6.56	20.07	22.4067	18.57
VIT_215s0048g01490	Geraniol 10-hydroxylase	5.38667	5.96667	6.86	6.45333	3.28333	11.06		2.46333	8.51333	4.02	3.85	3.88333	7.80333		3.76333	4.11	4.16333	8.94	20.91	9.61667		2.57	2.95667	4.07333	4.84333	3.76667	5.50333
VIT_215s0048g01500	Geraniol 10-hydroxylase	0	0	0.00333333	0	0	0		0.143333	0	0	0	0.0666667	0		0	0	0	0	0	0		0.03	0	0	0	0.0333333	0
VIT_215s0048g01530	Geraniol 10-hydroxylase	0.32	0.276667	0.44	0.11	0.116667	0.96		0.25	0.22	0.316667	0.363333	0.14	0.196667		0.346667	0.103333	0.0866667	0.173333	0.106667	0.126667		0.163333	0.0633333	0.113333	0.1	0.21	0.173333
VIT_215s0048g01600	Geraniol 10-hydroxylase	0.123333	0	0	0	0.0133333	0		0.396667	0.103333	0.123333	0.0833333	0.08	0.09		0.04	0	0	0	0	0		0	0.02	0.0866667	0.03	0.0766667	0
VIT_215s0048g01610	Geraniol 10-hydroxylase	0	0	0	0.04	0	0		0	0.03	0	0.0566667	0.06	0		0.0333333	0.0266667	0	0	0	0		0.03	0	0.03	0	0.156667	0.0633333
VIT_206s0004g02740	GATA transcription factor 10	3.18667	3.69333	2.92	2.29333	1.62667	2.17		3.13	2.75333	3.09667	2.09333	2.00333	2.14		2.39	2.91	2.46667	1.21333	1.61333	1.51333		1.52667	1.55	2.71667	1.64333	0.77	1.14667
VIT_213s0019g04390	GATA transcription factor 10	46.1033	97.7533	59.0067	38.1767	29.5233	20.0033		51.1767	54.1267	112.497	79.0467	55.2	20.2433		54.9767	78.2367	68.6167	28.6967	13.04	16.51		39.8233	82.3033	71	35.0267	20.67	20.0233
VIT_200s0533g00020	Zeaxanthin epoxidase, chloroplast precursor	7.58667	8.62333	8.84667	8.15333	5.09667	7.10667		8.74333	8.18667	10.3633	11.6667	5.69333	7.26		3.78333	5.97333	6.03	5.52333	5.61333	3.65667		4.96667	6.39	6.2	6.06333	3.77333	4.53333
VIT_202s0025g00240	Beta-carotene hydroxylase	0.406667	0.0166667	0.15	6.55	2.77333	4.80667		1.06333	1.88333	0.116667	1.68	2.61	2.92667		2.06	0.353333	0.416667	0.966667	2.43667	1.20333		3.96333	1.19	1.25	1.68667	4.62667	1.62333
VIT_202s0087g00710	ABA 8'-hydroxylase CYP707A1	3.28	1.36667	1.54333	9.44667	6.57667	3.43667		2.56667	3.5	1.94	7.87333	10.2433	6.56333		1.34	5.11333	1.84	5.9	3.80333	1.47667		0.906667	2.19667	1.89	3.84	5.4	5.07
VIT_202s0087g00910	9-cis-epoxycarotenoid dioxygenase	1.2	6.55333	7.3	4.23333	3.31667	86.9467		7.86	3.08667	4.22333	7.10333	11.7233	38.15		2.22333	0.723333	0.273333	1.70667	7.61667	29.3867		1.44667	0.856667	0.793333	2.82	10.0733	20.0267
VIT_202s0087g00930	9-cis-epoxycarotenoid dioxygenase	14.0933	20.7767	26.2467	16.8767	36.54	16.3467		7.30333	9.35	14.9033	6.43667	18.22	20.9067		14.4433	15.5333	19.94	28.4867	29.94	10.0633		56.3267	80.4167	47.7267	23.3667	14.7967	13.8733
VIT_203s0038g02680	Zeta-carotene desaturase	11.2167	5.62333	4.49	5.08333	4.62667	1.85333		10.21	4.15	8.93	4.83	3.98333	1.50667		11.4467	4.05333	4.67667	6.24667	2.73667	1.95		5.41	2.71667	2.82	7.30333	0.986667	1.18667
VIT_203s0063g00040	Abscisic acid-specific glucosyltransferase	0	0	0	0	0	0.0266667		0.02	0	0	0	0	0.0233333		0	0	0	0	0	0		0	0.0233333	0	0	0.02	0
VIT_203s0063g00380	ABA 8'-hydroxylase CYP707A1	0.03	0	0.0166667	0.543333	0.85	0.593333		0.196667	0.153333	0.0833333	0.246667	0.0866667	0.51		0.366667	0.0166667	0.23	0.273333	0.536667	0.563333		0.616667	0.0333333	0.0166667	0.03	0.586667	0.256667
VIT_204s0008g03380	Carotenoid cleavage dioxygenase 8	0.886667	0.92	0.586667	0.376667	0.626667	0.37		0.84	0.656667	1.01	0.7	0.746667	0.523333		0.963333	0.713333	0.78	0.703333	0.61	0.483333		0.9	0.623333	0.826667	0.67	0.433333	0.43
VIT_204s0023g01780	Phytoene dehydrogenase	4.92	4.94667	5.07333	4.16667	5.03333	4.3		6.55667	6.78667	7.82667	6.47667	6.47333	5.08333		10.5167	5.98	6.54	6.11333	2.86	3.42		5.67	5.09667	4.45667	5.44333	1.73333	2.67
VIT_204s0023g01790	Phytoene dehydrogenase	2.4	3.06333	3.51667	3.93667	5.31	7.7		2.57	4.08	2.19667	4.69333	4.36667	8.79		9.33667	2.65667	2.88667	2.53	1.11333	0.86		3.75667	1.98667	1.83	2.46667	1.42667	1.21667
VIT_204s0043g01010	Violaxanthin de-epoxidase	6.82333	9.80667	7.71333	4.90333	2.14	3.4		5.87	4.88667	11.2267	8.20667	3.55667	4.05333		7.24	4.73667	4.49333	5.88333	6.66667	2.62333		3.06	2.94333	3.87333	4.62667	2.32333	1.24
VIT_205s0051g00670	9-cis-epoxycarotenoid dioxygenase 4	1.03667	0.876667	0.79	2.38667	2.52333	2.34333		0.443333	0.94	0.373333	0.836667	2.94333	2.13667		0.18	0.5	0.606667	1.17667	4.03333	1.76333		0.12	0.2	0.426667	0.523333	1.54667	0.79
VIT_206s0080g00810	Lycopene beta cyclase (LYC)	10.5433	16.43	8.33667	19.21	7.18333	14.1167		8	4.50333	4.89333	8.43	3.64333	8.37667		11.81	10.07	5.77	19.7	29.7733	18.7633		2.6	3.02667	2.66	8.44	12.48	10.1
VIT_207s0031g00620	Zeaxanthin epoxidase (ZEP) (ABA1)	12.89	12.3	9.81333	8.04333	5.4	3.60667		11.5567	7.55667	14.7567	12.0133	8.51667	4.77667		9.94667	5.22	5.31	15.29	4.9	3.52667		10.1467	4.93333	3.56667	9.4	1.91	2.72333
VIT_207s0031g01770	Violaxanthin de-epoxidase	1.58667	1.44667	1.1	0.783333	0.82	1.58333		2.13667	1.29333	2.16333	1.04333	0.896667	1.09		1.95667	0.823333	1.01	0.546667	0.72	1.15667		0.69	0.51	0.673333	1.01	0.756667	1.24333
VIT_208s0007g04530	Carotene hydroxylase Epsilon-ring	4.04	3.96667	2.95667	5.70667	3.30333	2.76333		5.46333	5.49	6.72	6.63667	3.79	4.33		5.54333	3.06333	4.58667	4.96333	4.2	3.65667		3.30333	2.26	2.4	3.78	2.84667	2.73667
VIT_208s0007g05690	Lycopene beta cyclase, chloroplast precursor	6.29667	7.26	6.32667	7.95333	6.42667	10.52		6.43667	8.68	9.46667	8.76667	6.58	13.05		10.5833	5.68333	6.28333	10.1333	13.5367	10.5033		10.72	7.83	7.79	11.0467	8.53667	8.87333
VIT_208s0032g00800	Carotenoid isomerase, chloroplast precursor	31.86	32.62	32.7733	32.46	21.6433	26.48		11.43	23.11	16.26	17.4967	11.3533	13.51		55.97	25.3333	23.8433	36.7067	32.5267	25.1467		16.22	10.14	9.44667	11.7033	9.04333	7.46333
VIT_209s0002g00100	Phytoene desaturase	16.0633	15.9733	16.4533	15.88	8.90333	11.0667		17.4133	15.2933	23.6767	21.1867	12.6833	13.9833		22.9633	15.0133	15.3467	15.88	14.04	11.2867		14.1033	11.33	11.0467	12.44	8.12	8.43667
VIT_210s0003g03750	9-cis-epoxycarotenoid dioxygenase 2	12.3833	5.57	3.47667	21.4433	8.89667	4.72333		5.99	7.29	4.56	7.61667	7.89333	2.16667		10.7533	5.28333	5.87	13.8767	10.2167	10.9267		24.4867	29.0267	5.84667	14.5167	3.58667	3.66
VIT_211s0016g01880	Lycopene epsilon cyclase, chloroplast precursor	1.46	0.496667	0.536667	1.27333	0.363333	1.85333		6.08667	1.29	3.3	5.42667	1.38333	2.97333		5.61667	3.29	2.15667	5.09333	5.44	4.10333		2.96667	0.93	0.986667	3.88333	4.09333	2.24333
VIT_212s0035g01090	Carotenoid isomerase 1, chloroplast precursor	11.99	11.7767	13.1967	15.5567	13.09	29.7733		14.0133	23.1333	13.3133	14.2567	13.7633	32.98		20.4033	15.28	15.5033	14.4767	27.16	32.7933		17.0533	18.9867	23.59	13.2233	23.0167	28.5833
VIT_212s0035g01080	Carotenoid isomerase 1, chloroplast precursor	3.08	4.52333	4.53333	3.69333	1.73333	2.42333		1.25	2.69	2.65	2.79667	1	2.59333		2.83	4.21333	3.92	7.02	6.32333	4.82667		2.40667	2.00333	2.65667	3.26	3.14667	3.42
VIT_213s0064g00810	9,10[9',10']carotenoid cleavage dioxygenase [Vitis vinifera]	28.19	22.85	18.1267	33.2367	22.9533	18.5967		11.07	9.33	13.1633	15.4433	15.4667	9.38333		32.57	32.7567	28.0867	58.0467	41.5233	38.8667		32.0067	19.3967	12.7633	44.4667	30.9	17.82
VIT_213s0064g00840	9,10[9',10']carotenoid cleavage dioxygenase	245.993	203.867	173.593	294.107	195.2	166.963		308.457	207.813	303.51	320.203	281.68	201.76		189.007	157.29	157.603	291.013	206.333	187.19		254.03	138.58	107.283	322.137	229.713	135.307
VIT_213s0156g00350	Zeaxanthin epoxidase (ZEP) (ABA1)	13.7533	14.5033	14.9833	9.76	11.14	14.69		15.0233	16.21	13.6633	13.1667	12.5967	13.0533		18.3033	14.72	16.05	14.2367	18.9133	14.17		11.8367	11.7767	15.0733	10.9533	8.96	10.31
VIT_214s0030g01740	Zeta-carotene desaturase ZDS1	54.7567	66.41	53.37	122.053	63.42	63.56		22.99	32.95	32.12	63.27	46.7233	83.3233		101.18	60.1	72.9	94.8633	101.407	77.8033		103.19	56.27	33.8267	78.55	61.26	47.7333
VIT_214s0083g00770	Phytoene desaturase	10.9767	8.72667	6.3	7.49333	6.67	5.96333		17.3033	11.72	14.67	8.04667	10.1233	7.08		20.43	16.0467	14.1367	13.2433	10.54	8.20333		22.0333	13.3667	13.3167	14.74	11.7633	9.44333
VIT_216s0050g01090	Beta-carotene hydroxylase	7.34	4.53	2.53	6.92	5.03333	2.25333		15.09	8.14667	12.26	8.29	9.11667	3.55667		17.5967	1.89667	2.28667	8.19667	3.23667	2.00333		6.38	1.73333	1.31	12.6867	5.72667	2.22333
VIT_218s0001g10500	ABA 8'-hydroxylase CYP707A1	0.0366667	0	0	0.06	0.00666667	0		0	0.0166667	0.263333	0.0733333	0.0633333	0.0166667		0.1	0.07	0.38	5.00333	0.113333	0.0166667		0.226667	0.283333	0	1.87333	0.216667	0.0933333
VIT_219s0093g00550	9-cis-epoxycarotenoid dioxygenase 2	7.77333	5.67333	2.34	91.29	22.3	13.7333		6.04333	8.4	6.37667	22.7433	16.94	3.19667		37.8167	7.4	9.90333	36.92	7.33	6.45333		43.0833	5.83667	6.21333	19.3433	38.7867	6.59

## Sheet: Supplementary Table 7
Supplementary Table 7. Expression profiles of candidate transcripts related to norisoprenoid biosynthesis pathway in CS, R, V, and MH grapes in 2014.
Gene_ID	Annotation	Cabernet Sauvignon (FPKM)							Riesling (FPKM)							Victoria (FPKM)							Muscat Hamburg (FPKM)
		Summer			Winter				Summer			Winter				Summer			Winter				Summer			Winter
		E-L 35	E-L 36	E-L 38	E-L 35	E-L 36	E-L 38		E-L 35	E-L 36	E-L 38	E-L 35	E-L 36	E-L 38		E-L 35	E-L 36	E-L 38	E-L 35	E-L 36	E-L 38		E-L 35	E-L 36	E-L 38	E-L 35	E-L 36	E-L 38
VIT_204s0079g00680	Phytoene synthase, chloroplast precursor	8.29667	4.16333	4.72667	14.7967	3.69667	6.99667		9.70667	5.8	11.2567	18.51	4.55667	5.99		20.1667	4.56333	5.08333	8.92333	4.19	3.60667		9.52333	1.29	1.45	6.26667	4.85667	2.13333
VIT_206s0004g00820	Ribosomal protein S2; Squalene/phytoene synthase	0.59	0.556667	0.9	1.56	1.04	4.24		0.266667	0.31	0.116667	0.79	0.773333	2.69667		0.0566667	0.0333333	0.03	0.486667	0.656667	0.576667		0.0466667	0.06	0.133333	0.18	0.3	0.42
VIT_212s0028g00960	Phytoene synthase, chloroplast precursor	9.43667	12.6967	12.8667	14.5167	10.9567	11.8333		4.37333	7.60333	9.6	7.91	7.06	12.4367		7.69667	4.04	4.66667	12.7467	19.1833	14.23		11.7033	9.33333	5.78	18.4033	11.74	12.1233
VIT_214s0083g00770	Phytoene desaturase	10.9767	8.72667	6.3	7.49333	6.67	5.96333		17.3033	11.72	14.67	8.04667	10.1233	7.08		20.43	16.0467	14.1367	13.2433	10.54	8.20333		22.0333	13.3667	13.3167	14.74	11.7633	9.44333
VIT_209s0002g00100	Phytoene desaturase	16.0633	15.9733	16.4533	15.88	8.90333	11.0667		17.4133	15.2933	23.6767	21.1867	12.6833	13.9833		22.9633	15.0133	15.3467	15.88	14.04	11.2867		14.1033	11.33	11.0467	12.44	8.12	8.43667
VIT_204s0023g01780	Phytoene dehydrogenase	4.92	4.94667	5.07333	4.16667	5.03333	4.3		6.55667	6.78667	7.82667	6.47667	6.47333	5.08333		10.5167	5.98	6.54	6.11333	2.86	3.42		5.67	5.09667	4.45667	5.44333	1.73333	2.67
VIT_204s0023g01790	Phytoene dehydrogenase	2.4	3.06333	3.51667	3.93667	5.31	7.7		2.57	4.08	2.19667	4.69333	4.36667	8.79		9.33667	2.65667	2.88667	2.53	1.11333	0.86		3.75667	1.98667	1.83	2.46667	1.42667	1.21667
VIT_214s0030g01740	Zeta-carotene desaturase ZDS1	54.7567	66.41	53.37	122.053	63.42	63.56		22.99	32.95	32.12	63.27	46.7233	83.3233		101.18	60.1	72.9	94.8633	101.407	77.8033		103.19	56.27	33.8267	78.55	61.26	47.7333
VIT_203s0038g02680	Zeta-carotene desaturase	11.2167	5.62333	4.49	5.08333	4.62667	1.85333		10.21	4.15	8.93	4.83	3.98333	1.50667		11.4467	4.05333	4.67667	6.24667	2.73667	1.95		5.41	2.71667	2.82	7.30333	0.986667	1.18667
VIT_208s0032g00800	Carotenoid isomerase, chloroplast precursor	31.86	32.62	32.7733	32.46	21.6433	26.48		11.43	23.11	16.26	17.4967	11.3533	13.51		55.97	25.3333	23.8433	36.7067	32.5267	25.1467		16.22	10.14	9.44667	11.7033	9.04333	7.46333
VIT_212s0035g01090	Carotenoid isomerase 1, chloroplast precursor	11.99	11.7767	13.1967	15.5567	13.09	29.7733		14.0133	23.1333	13.3133	14.2567	13.7633	32.98		20.4033	15.28	15.5033	14.4767	27.16	32.7933		17.0533	18.9867	23.59	13.2233	23.0167	28.5833
VIT_212s0035g01080	Carotenoid isomerase 1, chloroplast precursor	3.08	4.52333	4.53333	3.69333	1.73333	2.42333		1.25	2.69	2.65	2.79667	1	2.59333		2.83	4.21333	3.92	7.02	6.32333	4.82667		2.40667	2.00333	2.65667	3.26	3.14667	3.42
VIT_208s0007g05690	Lycopene beta cyclase, chloroplast precursor	6.29667	7.26	6.32667	7.95333	6.42667	10.52		6.43667	8.68	9.46667	8.76667	6.58	13.05		10.5833	5.68333	6.28333	10.1333	13.5367	10.5033		10.72	7.83	7.79	11.0467	8.53667	8.87333
VIT_206s0080g00810	Lycopene beta cyclase (LYC)	10.5433	16.43	8.33667	19.21	7.18333	14.1167		8	4.50333	4.89333	8.43	3.64333	8.37667		11.81	10.07	5.77	19.7	29.7733	18.7633		2.6	3.02667	2.66	8.44	12.48	10.1
VIT_211s0016g01880	Lycopene epsilon cyclase, chloroplast precursor	1.46	0.496667	0.536667	1.27333	0.363333	1.85333		6.08667	1.29	3.3	5.42667	1.38333	2.97333		5.61667	3.29	2.15667	5.09333	5.44	4.10333		2.96667	0.93	0.986667	3.88333	4.09333	2.24333
VIT_202s0025g00240	Beta-carotene hydroxylase	0.406667	0.0166667	0.15	6.55	2.77333	4.80667		1.06333	1.88333	0.116667	1.68	2.61	2.92667		2.06	0.353333	0.416667	0.966667	2.43667	1.20333		3.96333	1.19	1.25	1.68667	4.62667	1.62333
VIT_216s0050g01090	Beta-carotene hydroxylase	7.34	4.53	2.53	6.92	5.03333	2.25333		15.09	8.14667	12.26	8.29	9.11667	3.55667		17.5967	1.89667	2.28667	8.19667	3.23667	2.00333		6.38	1.73333	1.31	12.6867	5.72667	2.22333
VIT_207s0031g01770	Violaxanthin de-epoxidase	1.58667	1.44667	1.1	0.783333	0.82	1.58333		2.13667	1.29333	2.16333	1.04333	0.896667	1.09		1.95667	0.823333	1.01	0.546667	0.72	1.15667		0.69	0.51	0.673333	1.01	0.756667	1.24333
VIT_204s0043g01010	Violaxanthin de-epoxidase	6.82333	9.80667	7.71333	4.90333	2.14	3.4		5.87	4.88667	11.2267	8.20667	3.55667	4.05333		7.24	4.73667	4.49333	5.88333	6.66667	2.62333		3.06	2.94333	3.87333	4.62667	2.32333	1.24
VIT_200s0533g00020	Zeaxanthin epoxidase, chloroplast precursor	7.58667	8.62333	8.84667	8.15333	5.09667	7.10667		8.74333	8.18667	10.3633	11.6667	5.69333	7.26		3.78333	5.97333	6.03	5.52333	5.61333	3.65667		4.96667	6.39	6.2	6.06333	3.77333	4.53333
VIT_207s0031g00620	Zeaxanthin epoxidase (ZEP) (ABA1)	12.89	12.3	9.81333	8.04333	5.4	3.60667		11.5567	7.55667	14.7567	12.0133	8.51667	4.77667		9.94667	5.22	5.31	15.29	4.9	3.52667		10.1467	4.93333	3.56667	9.4	1.91	2.72333
VIT_213s0156g00350	Zeaxanthin epoxidase (ZEP) (ABA1)	13.7533	14.5033	14.9833	9.76	11.14	14.69		15.0233	16.21	13.6633	13.1667	12.5967	13.0533		18.3033	14.72	16.05	14.2367	18.9133	14.17		11.8367	11.7767	15.0733	10.9533	8.96	10.31
VIT_214s0006g02880	Zeaxanthin epoxidase (ZEP) (ABA1)	32.3033	21.0733	12.7533	64.9133	24.0033	19.5333		30.51	28.5033	40.6533	68.9267	36.63	31.3		42.51	28.74	24.63	36.9533	17.8033	13.1433		60.1833	46.3667	26.7767	60.11	45.1167	26.86
VIT_213s0064g00810	9,10[9',10']carotenoid cleavage dioxygenase [Vitis vinifera]	28.19	22.85	18.1267	33.2367	22.9533	18.5967		11.07	9.33	13.1633	15.4433	15.4667	9.38333		32.57	32.7567	28.0867	58.0467	41.5233	38.8667		32.0067	19.3967	12.7633	44.4667	30.9	17.82
VIT_213s0064g00840	9,10[9',10']carotenoid cleavage dioxygenase	245.993	203.867	173.593	294.107	195.2	166.963		308.457	207.813	303.51	320.203	281.68	201.76		189.007	157.29	157.603	291.013	206.333	187.19		254.03	138.58	107.283	322.137	229.713	135.307
VIT_202s0087g00910	9-cis-epoxycarotenoid dioxygenase	1.2	6.55333	7.3	4.23333	3.31667	86.9467		7.86	3.08667	4.22333	7.10333	11.7233	38.15		2.22333	0.723333	0.273333	1.70667	7.61667	29.3867		1.44667	0.856667	0.793333	2.82	10.0733	20.0267
VIT_202s0087g00930	9-cis-epoxycarotenoid dioxygenase	14.0933	20.7767	26.2467	16.8767	36.54	16.3467		7.30333	9.35	14.9033	6.43667	18.22	20.9067		14.4433	15.5333	19.94	28.4867	29.94	10.0633		56.3267	80.4167	47.7267	23.3667	14.7967	13.8733
VIT_205s0051g00670	9-cis-epoxycarotenoid dioxygenase 4	1.03667	0.876667	0.79	2.38667	2.52333	2.34333		0.443333	0.94	0.373333	0.836667	2.94333	2.13667		0.18	0.5	0.606667	1.17667	4.03333	1.76333		0.12	0.2	0.426667	0.523333	1.54667	0.79
VIT_210s0003g03750	9-cis-epoxycarotenoid dioxygenase 2	12.3833	5.57	3.47667	21.4433	8.89667	4.72333		5.99	7.29	4.56	7.61667	7.89333	2.16667		10.7533	5.28333	5.87	13.8767	10.2167	10.9267		24.4867	29.0267	5.84667	14.5167	3.58667	3.66
VIT_219s0093g00550	9-cis-epoxycarotenoid dioxygenase 2	7.77333	5.67333	2.34	91.29	22.3	13.7333		6.04333	8.4	6.37667	22.7433	16.94	3.19667		37.8167	7.4	9.90333	36.92	7.33	6.45333		43.0833	5.83667	6.21333	19.3433	38.7867	6.59
VIT_202s0087g00710	ABA 8'-hydroxylase CYP707A1	3.28	1.36667	1.54333	9.44667	6.57667	3.43667		2.56667	3.5	1.94	7.87333	10.2433	6.56333		1.34	5.11333	1.84	5.9	3.80333	1.47667		0.906667	2.19667	1.89	3.84	5.4	5.07
VIT_203s0063g00380	ABA 8'-hydroxylase CYP707A1	0.03	0.01	0.0166667	0.543333	0.85	0.593333		0.196667	0.153333	0.0833333	0.246667	0.0866667	0.51		0.366667	0.0166667	0.23	0.273333	0.536667	0.563333		0.616667	0.0333333	0.0166667	0.03	0.586667	0.256667
VIT_213s0019g01010	ABA2	31.3633	24.7433	21.5267	21.3267	15.2233	9.53		57.4767	16.8733	45.85	33.6	23.7267	13.62		52.34	24.1133	20.7433	29.4767	7.90667	6.23333		33.7133	19.5033	18.0133	27.6267	10.03	10.82
VIT_206s0009g00770	AAO3	3.08333	3.39667	3.08	2.1	1.92333	1.77333		4.00667	3.77667	5.10333	4.74333	2.67667	3.17333		6.73333	2.96	3.24333	2.80333	1.68667	1.60667		4.32333	3.46	3.25333	2.69667	1.30667	1.62
VIT_209s0002g02050	1-deoxy-D-xylulose 5-phosphate synthase	0	0	0.02	0	0	0		0	0.0166667	0.0533333	0	0.113333	0.03		3.49333	0.55	0.413333	0.62	0.226667	0.0366667		0.656667	0.193333	0.183333	0.59	0.0266667	0
VIT_214s0006g01700	Isopentenyl diphosphate isomerase 2	1.87	0.153333	0.276667	1.11333	0.243333	0.123333		0	0.0533333	0	0	0.38	0		0.0566667	0	0	0.09	0	0		0.06	0	0	0.0966667	0.0766667	0.07
VIT_214s0006g01710	Isopentenyl-diphosphate delta-isomerase.	0.973333	0.0833333	0.336667	0.493333	0.22	0.0266667		0	0	0	0	0	0		0.0633333	0	0	0	0	0		0	0	0	0	0	0

## Sheet: Supplementary Table 8
Supplementary Table 8. Expression profiles of candidate transcripts related to C6/C9 compounds biosynthesis pathway in CS, R, V, and MH grapes in 2014.
Gene_ID	Annotation	Cabernet Sauvignon (FPKM)							Riesling (FPKM)							Victoria (FPKM)							Muscat Hamburg (FPKM)
		Summer			Winter				Summer			Winter				Summer			Winter				Summer			Winter
		E-L 35	E-L 36	E-L 38	E-L 35	E-L 36	E-L 38		E-L 35	E-L 36	E-L 38	E-L 35	E-L 36	E-L 38		E-L 35	E-L 36	E-L 38	E-L 35	E-L 36	E-L 38		E-L 35	E-L 36	E-L 38	E-L 35	E-L 36	E-L 38
VIT_200s0265g00170	Lipoxygenase	0.513333	0.27	0.266667	0.303333	0.456667	0.933333		0.583333	0.456667	0.463333	0.363333	0.363333	1.08333		1.22333	0.74	0.516667	0.673333	0.73	1.09667		0.593333	0.273333	0.4	0.376667	0.79	1.15333
VIT_201s0010g02750	Lipoxygenase	3.61667	4.41667	4.76	3.64667	3.89667	2.90667		5.95	4.45	3.32333	4.54667	2.37667	0.736667		9.20667	7.63333	6.40667	6.18667	2.68667	1.46		5.15667	5.17	5.40333	4.91	2.77333	1.59667
VIT_205s0020g03170	Lipoxygenase	6.36333	5.55	3.28333	3.84333	3.63	0.903333		6.42333	5.04	3.54667	6.63	4.3	1.75333		7.76	11	4.58667	11.4767	1.81	2.26333		8.73	6.42333	7.02667	7.79	4.72	1.36
VIT_206s0004g01450	Lipoxygenase	1.27333	1.25667	0.506667	0.45	0.64	0.696667		0.07	0.0333333	0.0566667	0.0433333	0.0566667	0.01		0.29	0.35	0.43	0.926667	0.88	0.123333		0.0266667	0.0666667	0.03	0.0633333	0.0366667	0.0933333
VIT_206s0004g01480	Lipoxygenase	0.63	0.326667	0.676667	0.433333	0.303333	0.42		0.953333	0.29	0.19	0.606667	0.27	0.0166667		0.23	0.123333	0.146667	0.323333	0.183333	0.06		1.88	0.746667	2.05333	2.47	1.37333	0.77
VIT_206s0004g01510	LOXA	297.473	424.983	242.837	238.203	173.56	68.9067		109.497	268.21	106.537	84.0967	155.993	184.95		145.327	121.357	146.28	251.757	175.317	325.83		134.223	99.5267	150.533	228.213	115.35	146.61
VIT_209s0002g01080	LOXO	18.7867	24.6733	26.1167	30.38	22.9833	24.51		47.9733	29.3467	56.71	120.477	27.0367	6.49333		41.74	35.8567	31.1867	20.2833	6.88333	5.27667		9.5	29.3967	22.3267	11.0267	5.48333	8.50333
VIT_213s0064g01480	Lipoxygenase	2.12	0.06	0.1	0.576667	0.356667	0.163333		7.09667	0.246667	0.786667	1.22667	0.64	0.463333		4.11667	0.45	0.21	0.536667	0.693333	0.11		0.893333	0.05	0.0433333	1.53	0.0433333	0.0366667
VIT_214s0128g00780	LOXC	3.95333	4.41333	15.0367	5.76	13.3833	10.5833		3.34	3.81667	1.29333	6.73333	1.86	0.43		5.11	3.64	5.30333	10.8933	0.486667	0.933333		5.35	3.75667	4.87333	2.49333	1.80667	1.64667
VIT_214s0128g00790	Lipoxygenase	0.303333	0.426667	1.36667	0.52	0.72	0.716667		0.913333	0.863333	0.39	1.82667	0.54	0.156667		1.34	0.983333	1.58667	2.77667	0.126667	0.13		0.13	0.0233333	0.166667	0.126667	0.02	0.04
VIT_212s0059g01060	Hydroperoxide_lyase_(HPL1)	277.943	230.05	258.587	270.4	232.983	198.26		457.85	420.993	373.267	453.99	588.843	330.777		219.797	259.833	304.89	407.623	336.06	216.03		274.883	252.18	343.42	279.413	249.667	208.62
VIT_200s0371g00050	Alcohol dehydrogenase	135.08	84.0767	59.02	375.54	155.09	79.7367		34.6833	48.8933	43.1233	232.34	100.447	95.0867		112.8	66.6933	78.3433	197.19	177.98	142.703		12.48	5.02333	3.57	18.9	33.8733	11.5767
VIT_204s0044g01110	Alcohol dehydrogenase 6	1275.65	1113.64	1079.54	2087.32	1951.72	922.337		1176.58	1793.57	603.46	1216.59	2072.22	630.5		1029.11	2407.09	2247.83	1550.33	1151.41	1385.05		1075.14	1687.29	1499.93	1185.64	927.257	632.573
VIT_204s0044g01120	Alcohol dehydrogenase 2 [Vitis vinifera]	32.0667	6.65	16.8	40.63	63.1667	42.86		72.2467	134.083	8.38333	98.7133	151.81	24.46		50.1167	283.913	234.607	93.4533	74.83	158.987		74.07	154.727	140.757	89.5533	88.1667	55.16
VIT_204s0044g01130	Alcohol dehydrogenase 2 [Vitis vinifera]	5.72667	0.743333	3.14667	6.73333	11.23	8.06333		146.72	256.54	48.8833	192.873	283.657	47.3867		166.24	473.63	373.217	207.487	103.413	126.96		169.907	268.347	258.107	187.91	148.977	86.34
VIT_206s0004g04310	Alcohol dehydrogenase	6.05	2.96667	2.51	3.29667	1.95333	0.473333		3.44667	2.47667	2.44667	3.15667	1.53667	0.326667		5.34	2.5	1.51	4.8	0.82	0.473333		3.03667	1.66667	1.35333	3.56333	0.853333	0.306667
VIT_206s0004g04320	Alcohol dehydrogenase 3	8.76667	5.07333	4.83	5.88667	3.65333	0.963333		12.19	4.79333	8.11667	7.91667	4.39667	0.263333		12.36	6.81	5.44667	8.76333	1.61333	1.61667		7.67	2.79667	3.35	8.71	3.13667	1.08333
VIT_207s0005g04600	Alcohol dehydrogenase class III	98.4333	64.79	65.34	92.8467	50.3533	26.1733		153.9	85.12	130.003	143.1	102.283	33.0533		116.543	89.0567	80.7167	90.41	54.5767	31.2533		80.7633	52.62	51.9433	81.9133	56.3	27.7033
VIT_207s0005g04610	Alcohol dehydrogenase class III	100.407	65.49	69.24	97.4767	51.3167	23.6933		155.993	77.0533	133.527	149.217	98.7567	35.1767		115.22	90.22	80.77	92.75	51.3667	31.57		72.5167	54.6533	52.9633	86.4233	57.1133	28.5833
VIT_214s0030g01030	Alcohol dehydrogenase	2.17667	1.83333	1.98333	1.24333	2.1	1.24		2.4	1.84667	1.04667	1.02	1.53667	1.25667		3.98333	1.09333	1.00333	1.39	0.793333	1.49667		0.683333	0.34	0.57	0.783333	0.336667	0.56
VIT_214s0068g01760	Alcohol dehydrogenase	20.5333	12.5967	25.1167	23.8	82.83	96.9		49.1467	112.01	23.39	48.51	194.563	104.417		72.4267	206.007	199.287	185.23	184.8	195.42		93.88	173.717	192.413	98.29	212.99	146.517
VIT_216s0039g00320	Alcohol dehydrogenase 1	2.99667	2.29333	2.72333	4.62333	3.55	5.05667		6.40667	4.65	5.23667	8.19667	7.85	5.42		4.91333	4.06333	3.78333	5.73333	3.54667	3.07333		4.62	4.24333	3.53	6.04	5.90667	4.29667
VIT_217s0000g03280	Alcohol dehydrogenase 7	2073.77	2164.75	1721.47	1614.4	1549.27	525.73		899.693	665.27	1405.05	1052.69	1382.04	576.613		1939.47	2537.29	2689.81	1774.97	1238.82	927.623		1397.91	1246.8	894.357	988.847	853.13	593.137
VIT_218s0001g00380	Alcohol dehydrogenase	17.7033	15.5067	15.0967	12.8767	12.7867	7.55667		7.70667	5.76	5.86333	5.50667	9.99333	2.12667		20.64	10.4233	11.4833	14.7133	5.7	5.24667		21.1533	9.25667	9.05667	15.88	6.03667	4.78333
VIT_218s0001g15410	Alcohol dehydrogenase 1	115.517	60.9233	86.1133	167.94	168.63	55.1933		78.1033	25.59	6.62667	32.9867	69.14	14.06		60.5867	32.19	26.1333	107.673	34.2567	15.1		21.2967	19.76	23.7333	84.7367	38.1333	33.79
VIT_218s0001g15450	Alcohol dehydrogenase 3	32.0433	8.94667	8.05	54.92	44.32	33.57		68.86	48.62	38.13	111.017	83.55	58.4133		91.63	49.9133	40.31	89.35	73.5767	74.75		96.9033	55.77	43.2033	117.08	117.983	84.6867

## Sheet: Supplementary Table 9
Supplementary Table 9. Pearson correlation analysis between transcriptome gene expression and the corresponding aroma concentration of C6/C9 compounds, terpenes, and norisoprenoids.
	Gene_ID	Cabernet Sauvignon	Riesling	Victoria	Muscat Hamburg
C6/C9	VIT_201s0010g02750	0.24	-0.5	-0.70*	-0.77*
	VIT_206s0004g01450	-0.48	-0.68	0.32	0.73**
	VIT_204s0044g01130	0.23	0.34	-0.78*	-0.65*
Terpenes	VIT_200s0218g00110	0.31	-0.17	0.65	-0.72*
	VIT_204s0008g04970	0.28	0.14	0.92**	0.68*
	VIT_211s0052g01730	0.64*	0.32	0.83*	0.65*
	VIT_211s0052g01780	0.74*	0.2	0.79*	0.53
	VIT_212s0035g01950	-0.18	-0.48	-0.76**	-0.72**
	VIT_203s0063g02030	-0.84	-0.03	0.97**	0.87**
	VIT_206s0004g02900	-0.61	-0.2	0.64	0.79*
	VIT_204s0023g00600	0.71*	0.94**	0.25	-0.6
	VIT_211s0206g00020	-0.70*	0.83*	-0.41	-0.21
	VIT_203s0038g03050	0.92*	0.74*	0.87*	0.44
	VIT_218s0122g00610	0.71*	0.46	-0.86*	-0.62
	VIT_202s0012g02530	0.18	0.11	-0.71*	-0.70*
	VIT_212s0134g00020	-0.15	0.18	0.97**	0.64
	VIT_212s0134g00030	-0.67*	0.07	0.90**	0.89*
	VIT_208s0007g06860	-0.19	0.66*	-0.62*	-0.19
	VIT_212s0059g02710	0.76*	0.82*	-0.82*	-0.3
	VIT_200s0266g00070	-0.32	-0.17	0.91**	0.83**
	VIT_200s0385g00010	0.33	-0.05	0.81*	0.63
	VIT_200s0385g00020	-0.62*	-0.31	0.90**	0.09
	VIT_218s0001g04120	-0.52	-0.3	0.94*	0.90*
	VIT_218s0001g04220	-0.55	-0.74*	0.98*	0.90*
	VIT_218s0001g04280	-0.28	-0.32	0.78*	0.86*
	VIT_218s0001g04780	-0.54	0.27	0.97**	0.90**
	VIT_218s0001g05240	-0.55	-0.18	0.94**	0.85*
	VIT_219s0014g04900	-0.5	0.38	-0.73*	-0.62
	VIT_219s0085g00830	-0.76*	-0.76*	0.85*	0.29
	VIT_215s0046g03550	-0.60*	-0.78*	-0.86*	-0.56
	VIT_215s0046g03570	-0.5	-0.26	-0.88**	-0.68**
	VIT_215s0046g03590	-0.18	-0.69*	-0.92*	-0.83*
	VIT_215s0046g03600	0.61*	-0.63*	-0.82*	-0.60*
	VIT_215s0046g03650	-0.76*	-0.74*	-0.90**	-0.39
	VIT_202s0012g02820	0.86**	-0.35	0.93**	0.49
	VIT_202s0025g04864	0.85**	0.87**	0.83**	0.11
	VIT_202s0025g04880	0.91**	0.81**	0.91**	0.11
	VIT_203s0097g00460	-0.12	0.17	0.96*	0.38
	VIT_215s0048g01490	-0.2	-0.26	0.84*	0.73*
	VIT_215s0048g01610	0.86*	0.74*	-0.63*	0.21
	VIT_206s0004g02740	-0.61*	-0.85*	-0.68*	-0.14
	VIT_202s0087g00710	0.97**	0.91**	-0.1	0.54
	VIT_202s0087g00910	-0.16	0.22	0.75*	0.81*
	VIT_203s0063g00380	0.67*	0.13	0.82*	-0.16
	VIT_204s0023g01780	-0.60*	-0.38	-0.83**	-0.55
	VIT_204s0023g01790	0.16	0.35	-0.64*	-4.2
	VIT_205s0051g00670	0.74*	0.61	0.87*	0.29
	VIT_207s0031g01770	-0.76*	-0.72*	-0.3	0.68
	VIT_209s0002g00100	-0.19	-0.24	-0.66*	-0.66*
	VIT_212s0035g01090	0.02	-0.15	0.86**	0.78**
	VIT_213s0064g00810	0.68*	0.69*	0.3	-0.48
	VIT_213s0156g00350	-0.94**	-0.73*	0.1	-0.14
	VIT_214s0083g00770	-0.23	-0.63*	-0.86*	-0.71*
	VIT_219s0093g00550	0.94	0.76	-0.46	-0.52
Norisoprenoids	VIT_204s0043g01010	0.77*	0.18	-0.26	-0.63
	VIT_200s0533g00020	0.67*	0.34	-0.31	-0.61
	VIT_213s0064g00810	0.15	0.72*	0.68*	0.12
	VIT_213s0064g00840	0.22	0.63*	0.66*	0.14
	VIT_202s0087g00910	-0.65*	0.01	0.44	0.67*
**: significantly correlated at p < 0.01; *: significantly correlated at p < 0.05.
